# Supplementary material for: Redox induced oxidative C–C coupling of non-innocent bis(heterocyclo)methanides
Source: Royal Society of Chemistry journal article supplement (doi:10.1039/d1dt03310g), 2021-01-01
Supplement: d1dt03310g1.pdf [file d1dt03310g1.pdf]

**Supporting Information**

**Redox induced oxidative C-C coupling of non-innocent  
bis(heterocyclo)methanides**

Sanjib Panda,<sup>\*a,b</sup> Rupal Baliyan,<sup>a</sup> Suman Dhara,<sup>a</sup> Kuo-Wei Huang,<sup>b</sup> and Goutam Kumar  
Lahiri<sup>\*a</sup>

<sup>a</sup>Department of Chemistry, Indian Institute of Technology Bombay, Mumbai, Powai 400076,  
India

<sup>b</sup>KAUST Catalysis Center and Division of Chemical and Life Sciences and Engineering,  
KAUST, Saudi Arabia

## Table of Contents

|                                                                                                          |         |
|----------------------------------------------------------------------------------------------------------|---------|
| Fukui Indices Calculation (Scheme S1)                                                                    | S3      |
| Crystal Structures (Fig. S1a-S1c)                                                                        | S4-S6   |
| NMR Spectra of Ligand and Complexes (Fig. S2a-S2u)                                                       | S7-S17  |
| UV-vis Change for <b>1a</b> Formation (Initial N <sub>2</sub> atm to air exposure)<br>(Figure S3)        | S18     |
| UV-vis Change for [3-H]PF <sub>6</sub> → [3]PF <sub>6</sub> Transformation (Fig. S4)                     | S19     |
| Change in Cyclic Voltammograms for [3-H]PF <sub>6</sub> → [3]PF <sub>6</sub><br>Transformation (Fig. S5) | S20     |
| Cyclic Voltammograms of <b>1a-1b</b> (Fig. S6)                                                           | S21     |
| Spin Density Plot (Fig. S7)                                                                              | S22     |
| Transition State Calculation for the Oxygenation versus<br>Homocoupling (Scheme S2 and Fig. S8)          | S23     |
| Crystallographic Parameters (Tables S1-S5)                                                               | S24-S28 |
| EPR Data (Table S6)                                                                                      | S29     |
| Electrochemical Data (Table S7)                                                                          | S30     |
| Spin Density Data (Table S8)                                                                             | S31     |
| DFT Calculated Selective MO Compositions (Table S9)                                                      | S32     |
| DFT Calculated MO Compositions (Tables S10-S27)                                                          | S33-S62 |
| Cartesian Coordinates                                                                                    | S63-S92 |

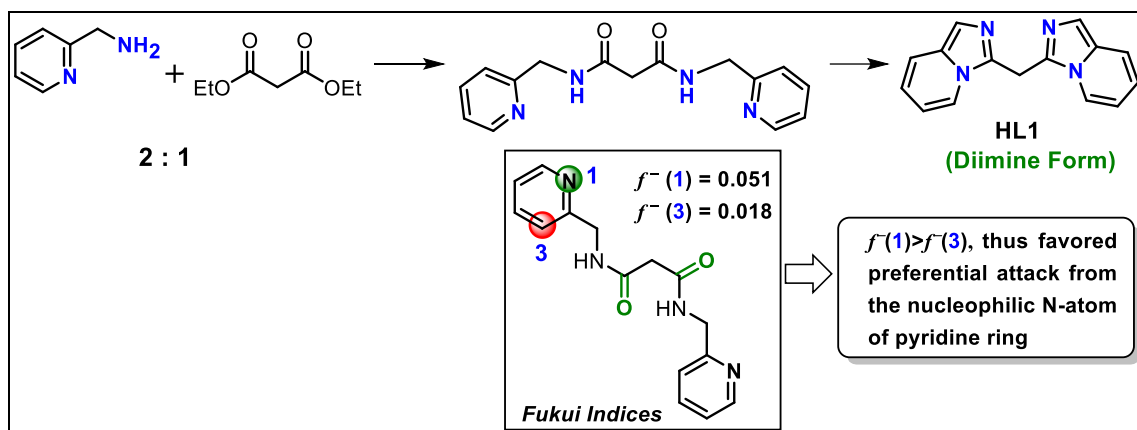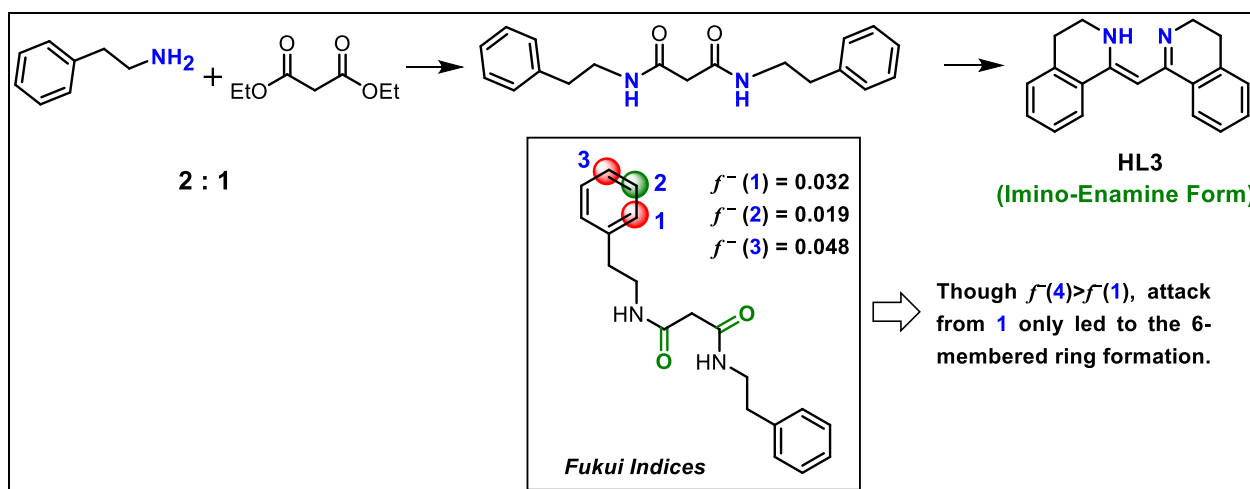

**Scheme S1** Fukui indices calculation and positional selectivity.

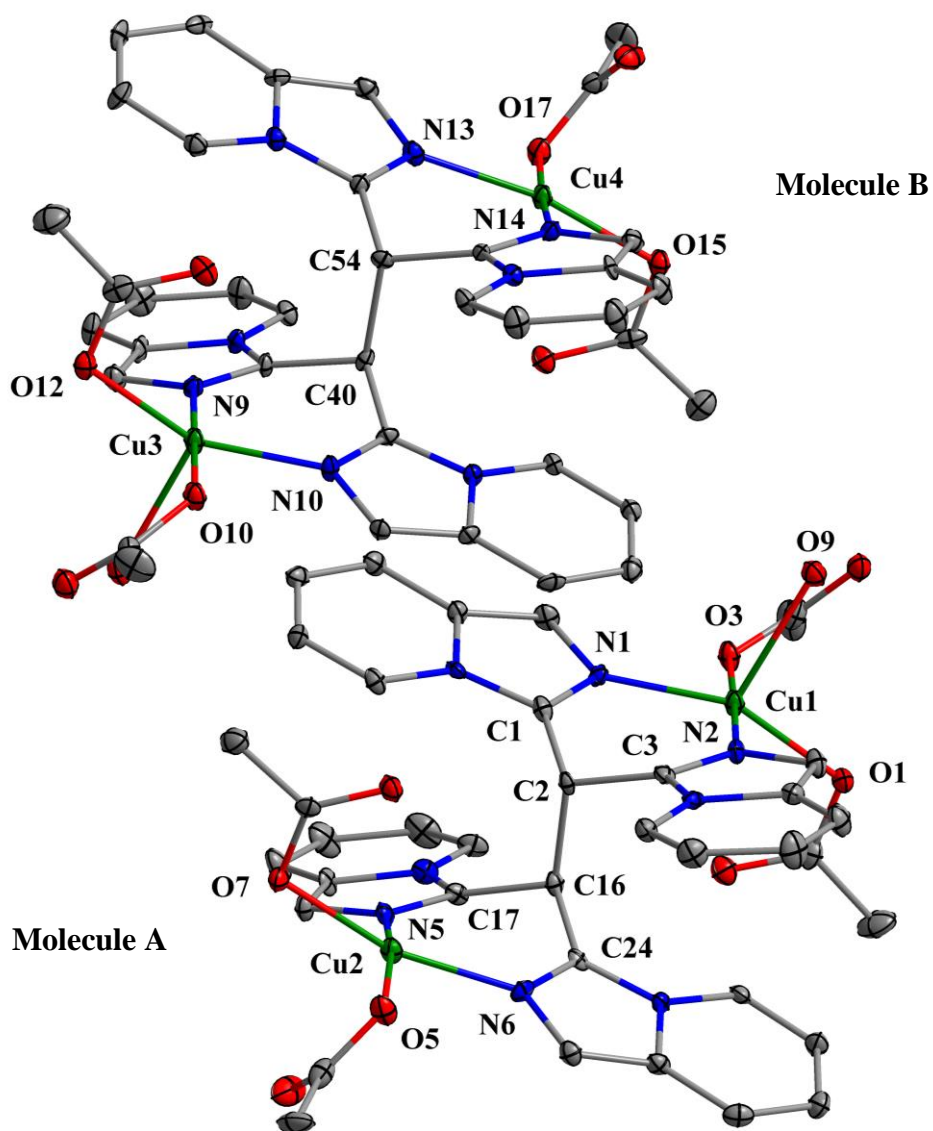

**Fig. S1a** Perspective view of the asymmetric unit of **1a**. Ellipsoids are drawn at 20% probability level. Hydrogen atoms are removed for clarity.

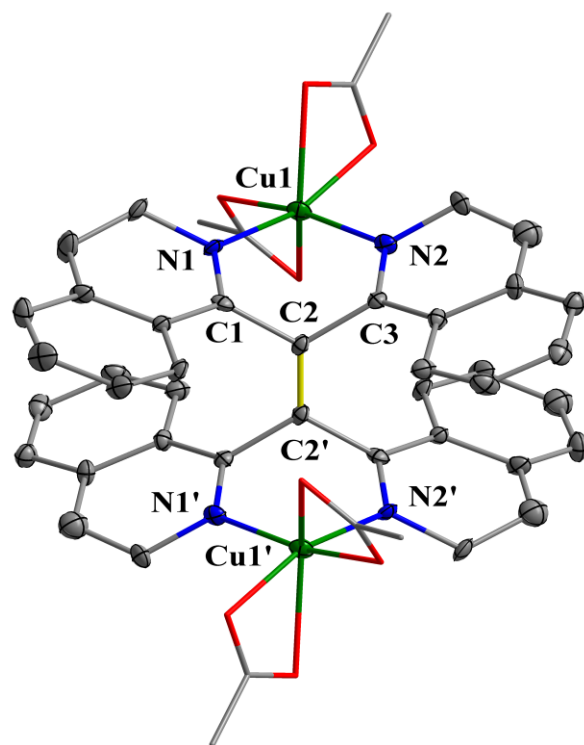

**Fig. S1b** Perspective view of the asymmetric unit of **1c**. Ellipsoids are drawn at 25% probability level. Hydrogen atoms are removed for clarity.

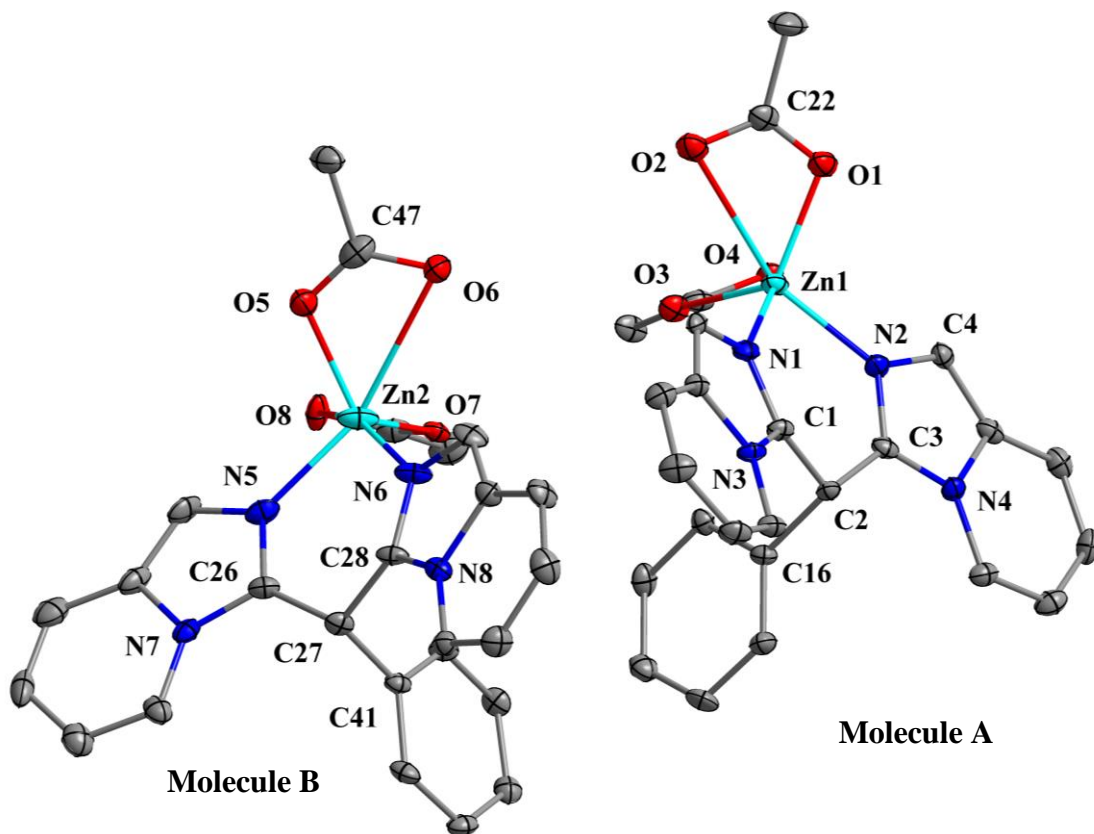

**Fig. S1c** Perspective view of the asymmetric unit of **2**. Ellipsoids are drawn at 20% probability level. Hydrogen atoms are removed for clarity.

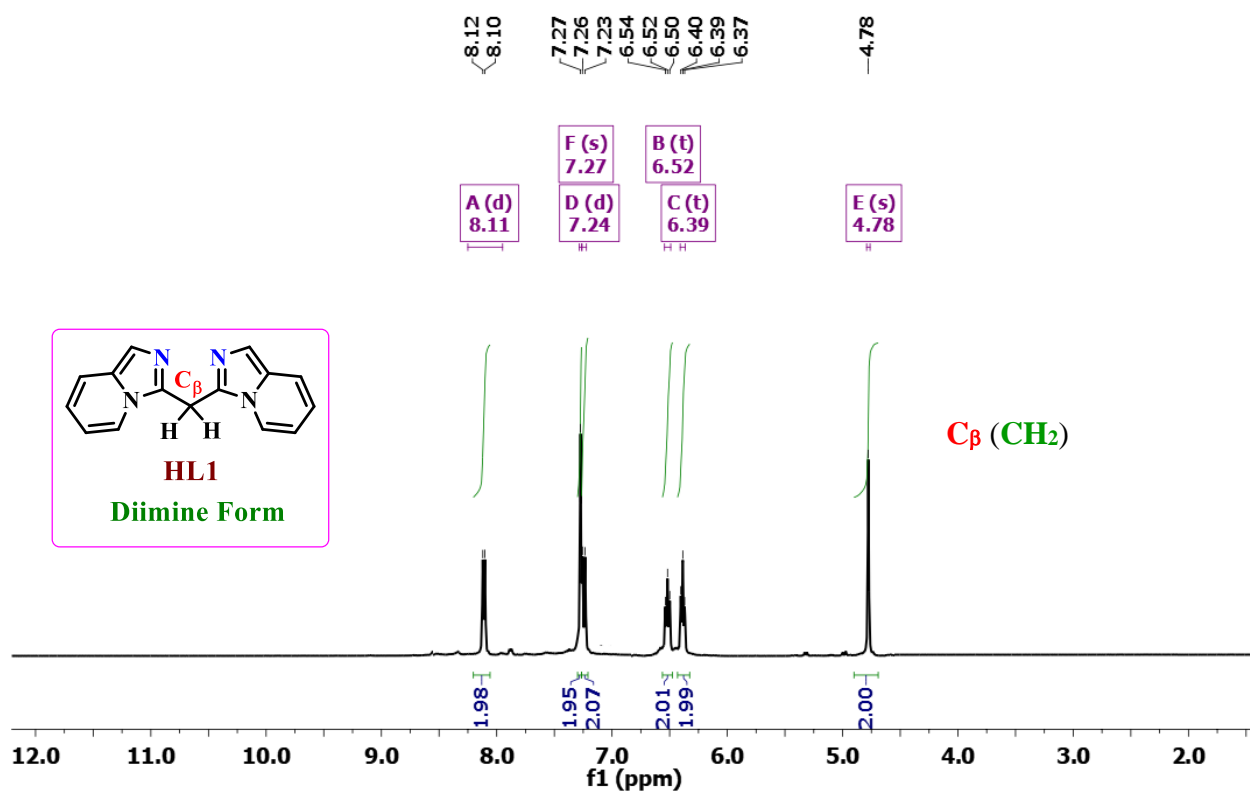

Fig. S2a  $^1\text{H}$  NMR of **HL1** in  $\text{CDCl}_3$  with TMS ( $\delta = 0$  ppm) as internal standard.

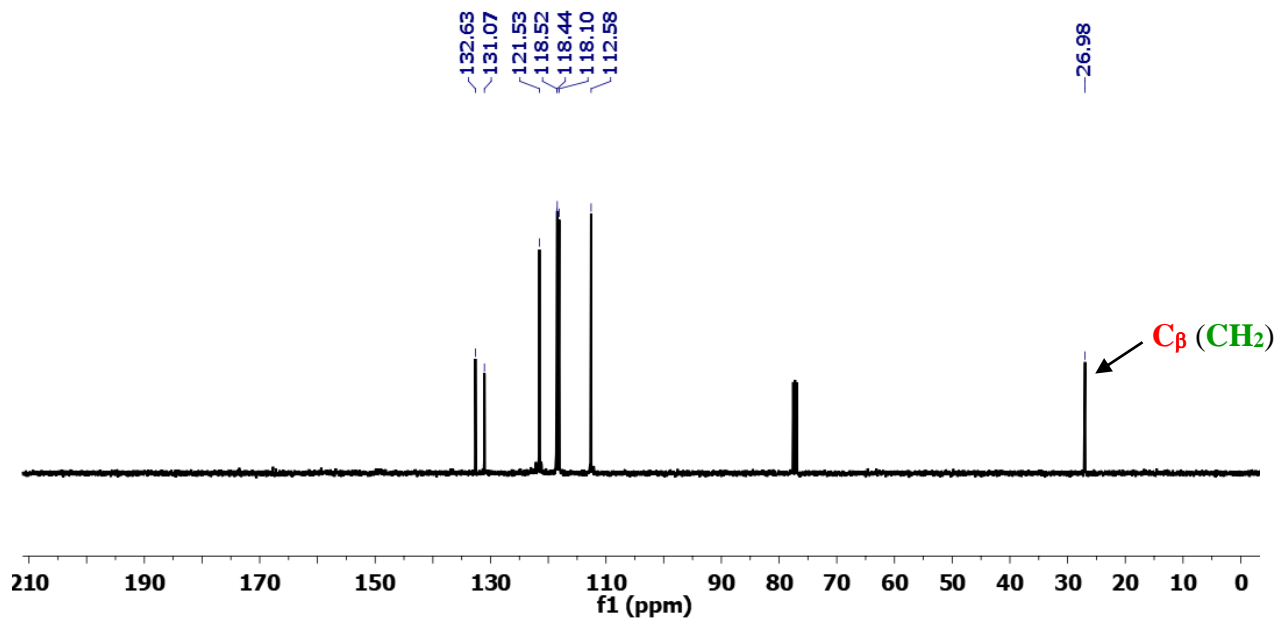

Fig. S2b  $^{13}\text{C}$  NMR of **HL1** in  $\text{CDCl}_3$  with TMS ( $\delta = 0$  ppm) as internal standard.

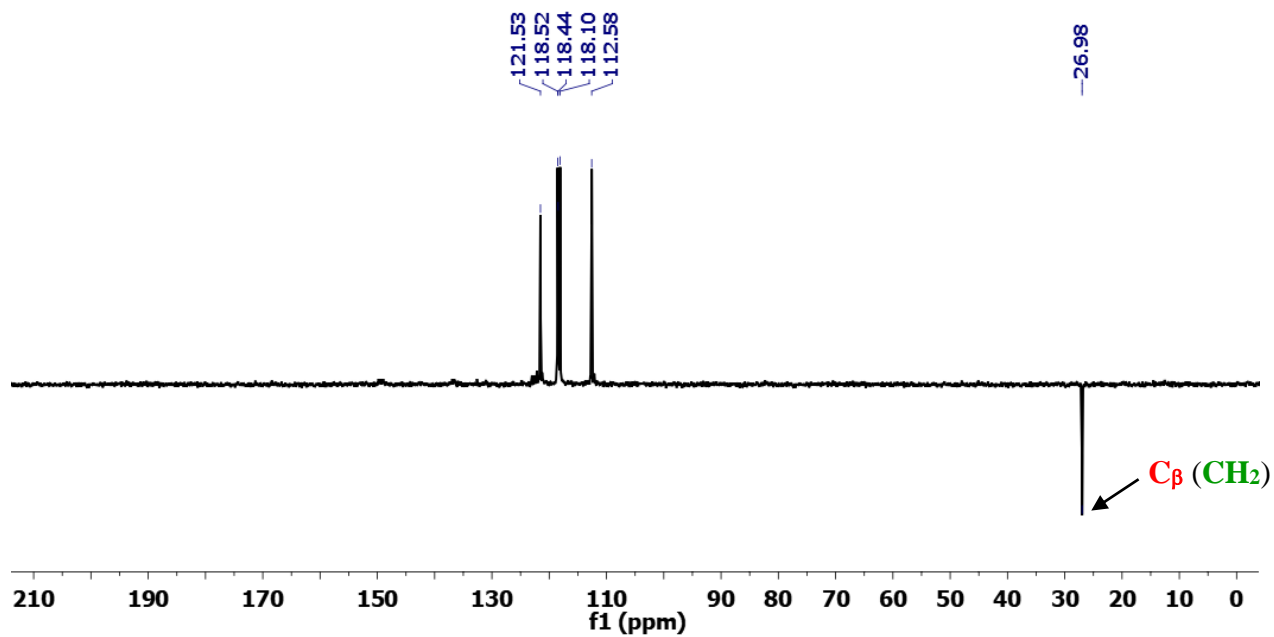

**Fig. S2c** DEPT-135 NMR of **HL1** in  $\text{CDCl}_3$  with TMS ( $\delta = 0$  ppm) as internal standard.

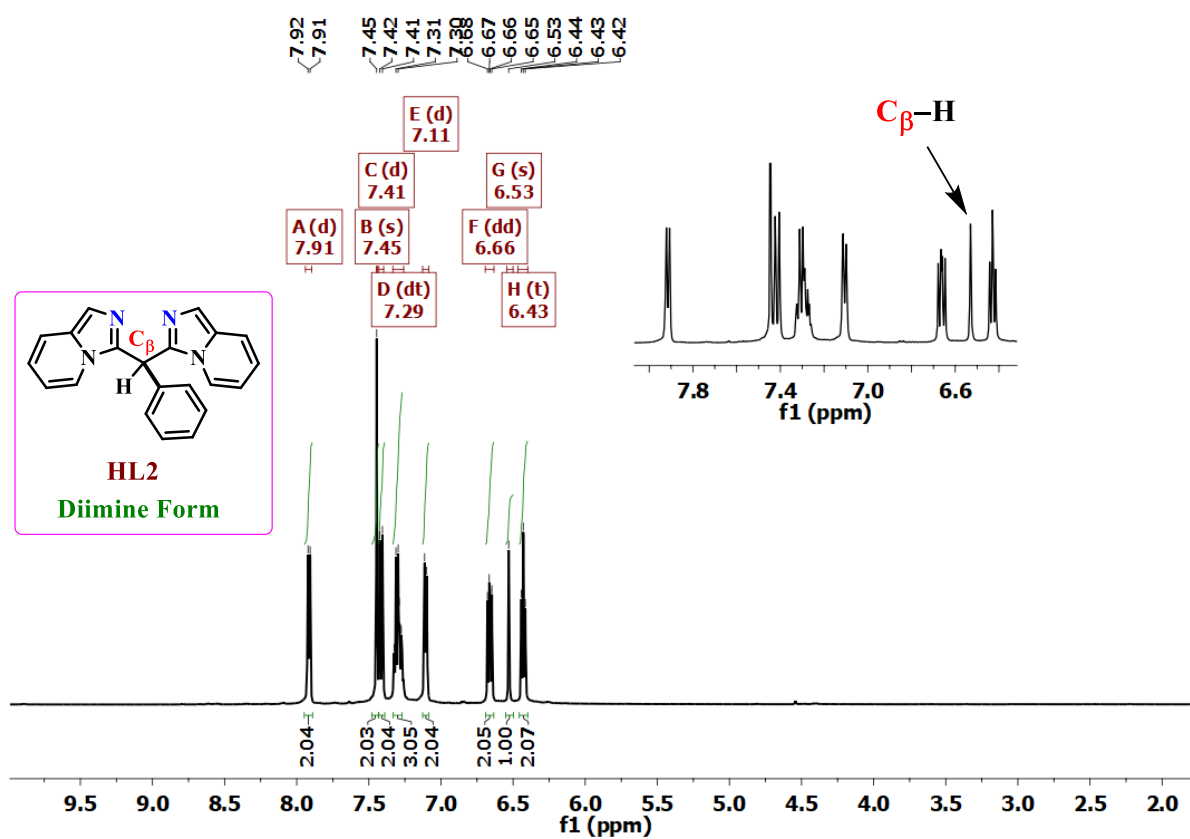

**Fig. S2d**  $^1\text{H}$  NMR of **HL2** in  $\text{CDCl}_3$  with TMS ( $\delta = 0$  ppm) as internal standard.



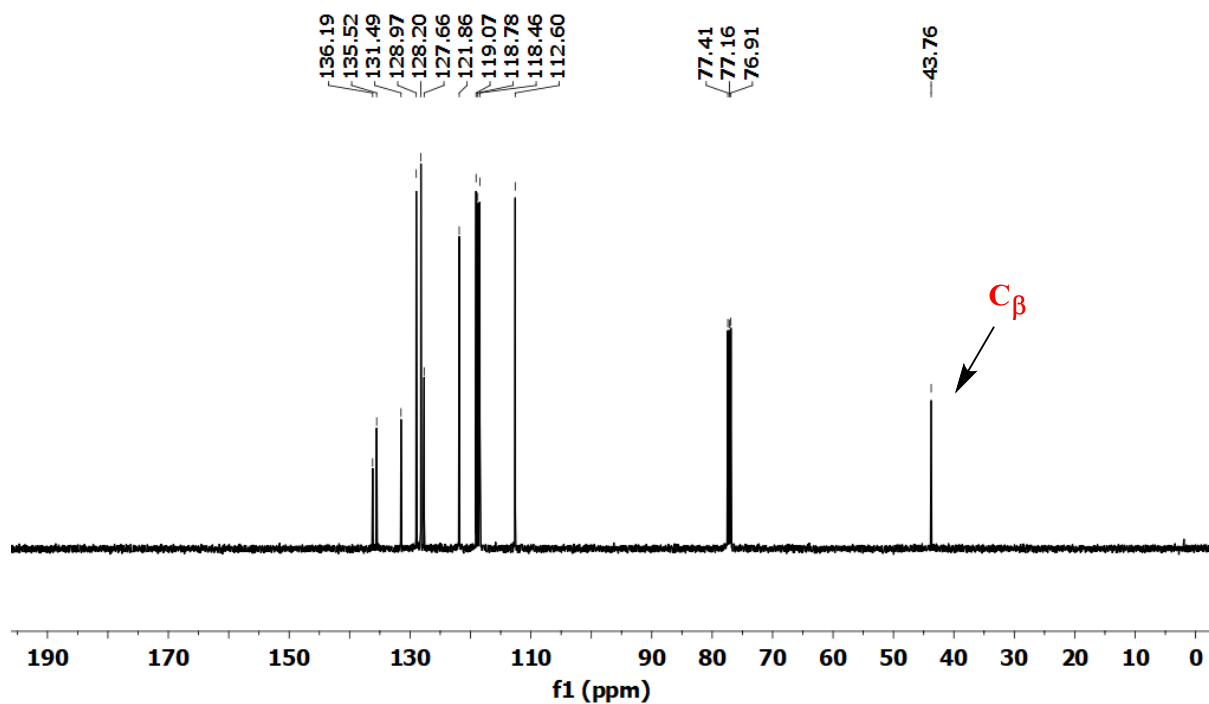

**Fig. S2e**  $^{13}\text{C}$  NMR of **HL2** in  $\text{CDCl}_3$  with TMS ( $\delta = 0$  ppm) as internal standard.

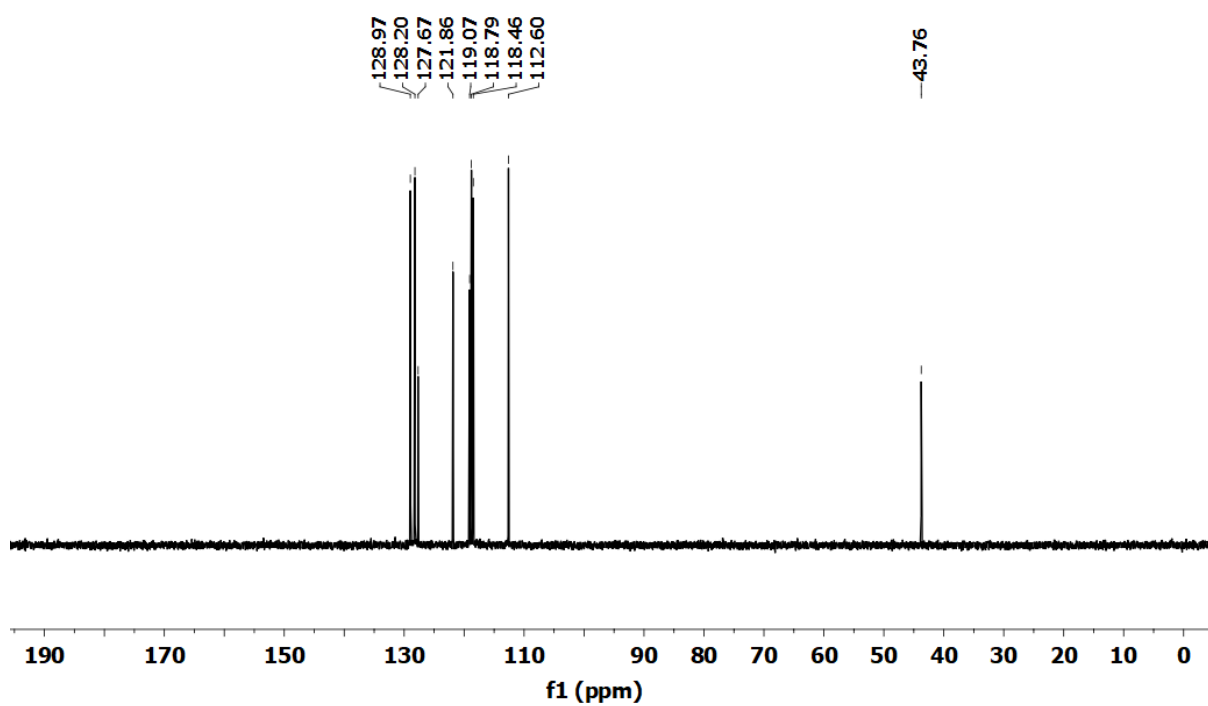

**Fig. S2f** DEPT-135 NMR of **HL2** in  $\text{CDCl}_3$  with TMS ( $\delta = 0$  ppm) as internal standard.

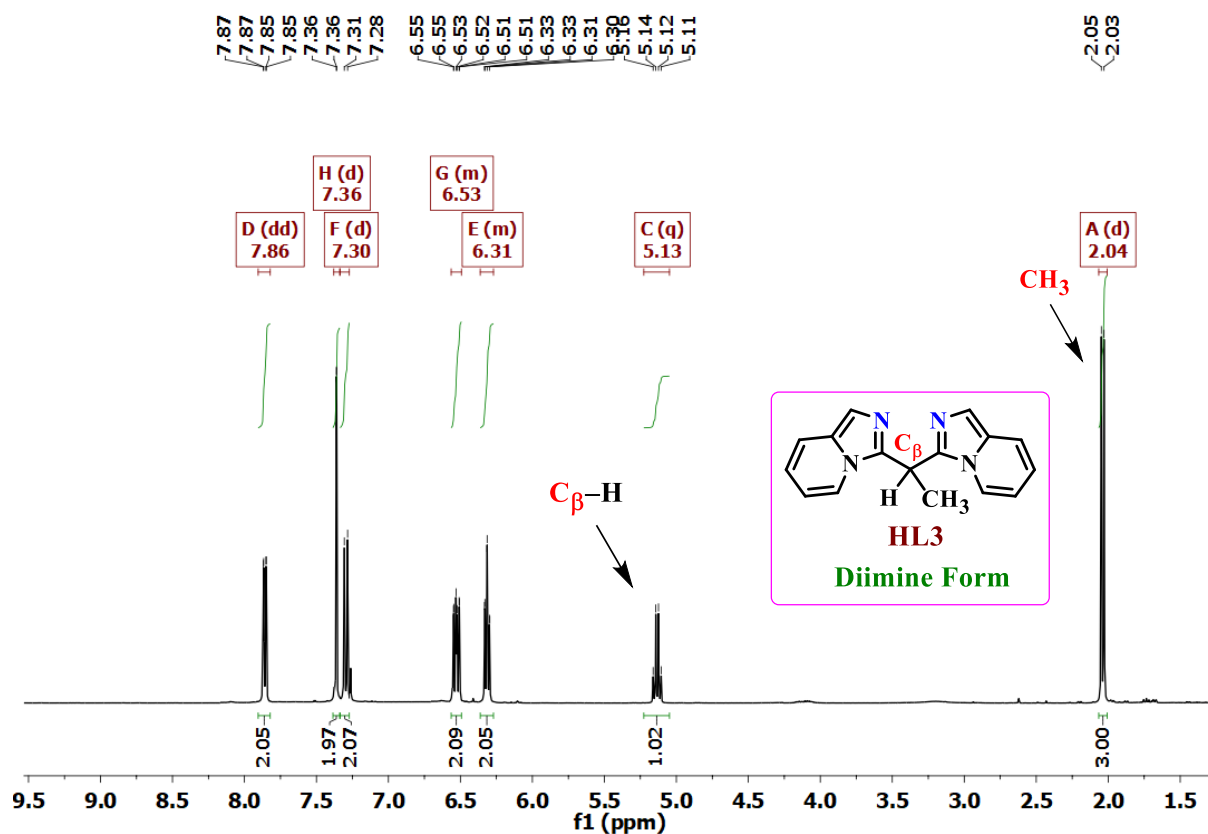

Fig. S2g <sup>1</sup>H NMR of HL3 in CDCl<sub>3</sub> with TMS ( $\delta = 0$  ppm) as internal standard.

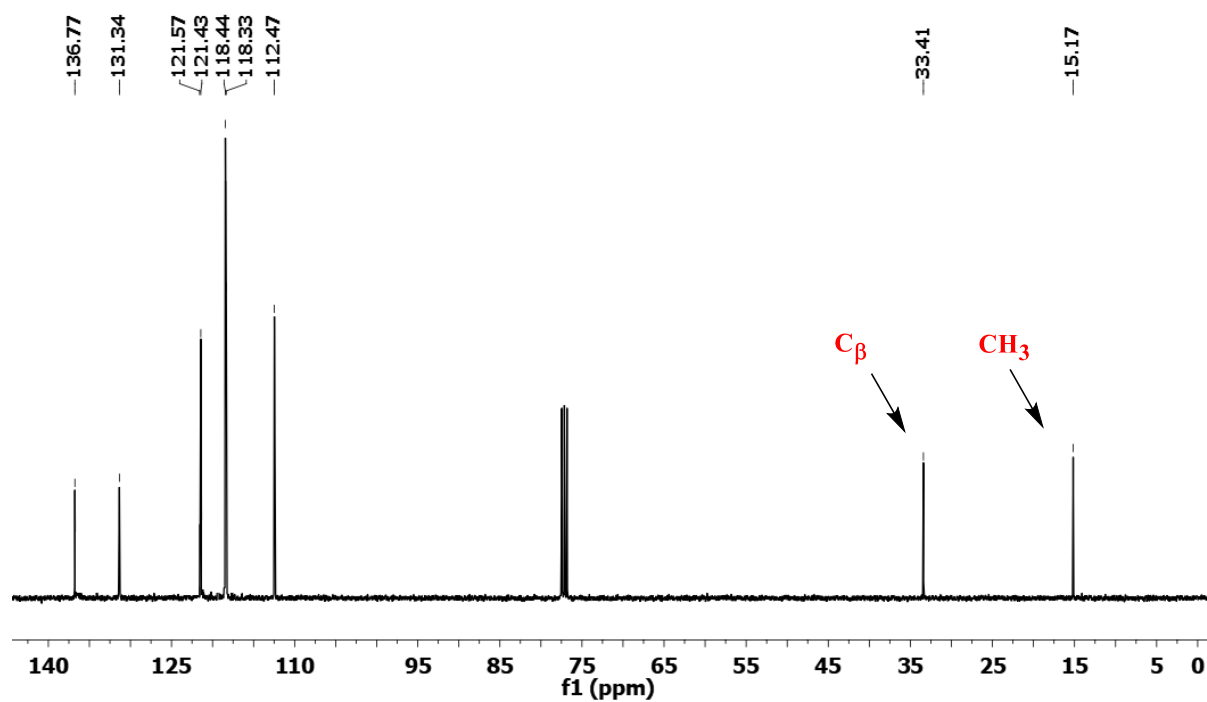

Fig. S2h <sup>13</sup>C NMR of HL3 in CDCl<sub>3</sub> with TMS ( $\delta = 0$  ppm) as internal standard.

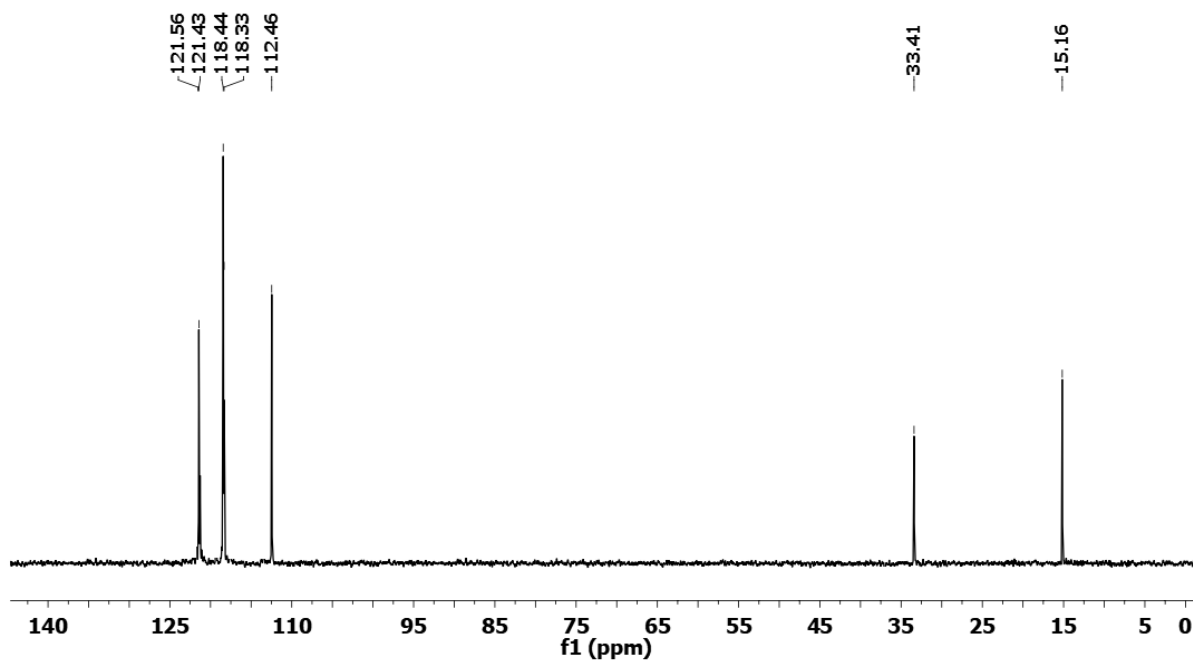

**Fig. S2i** DEPT-135 NMR of **HL3** in  $\text{CDCl}_3$  with TMS ( $\delta = 0$  ppm) as internal standard.

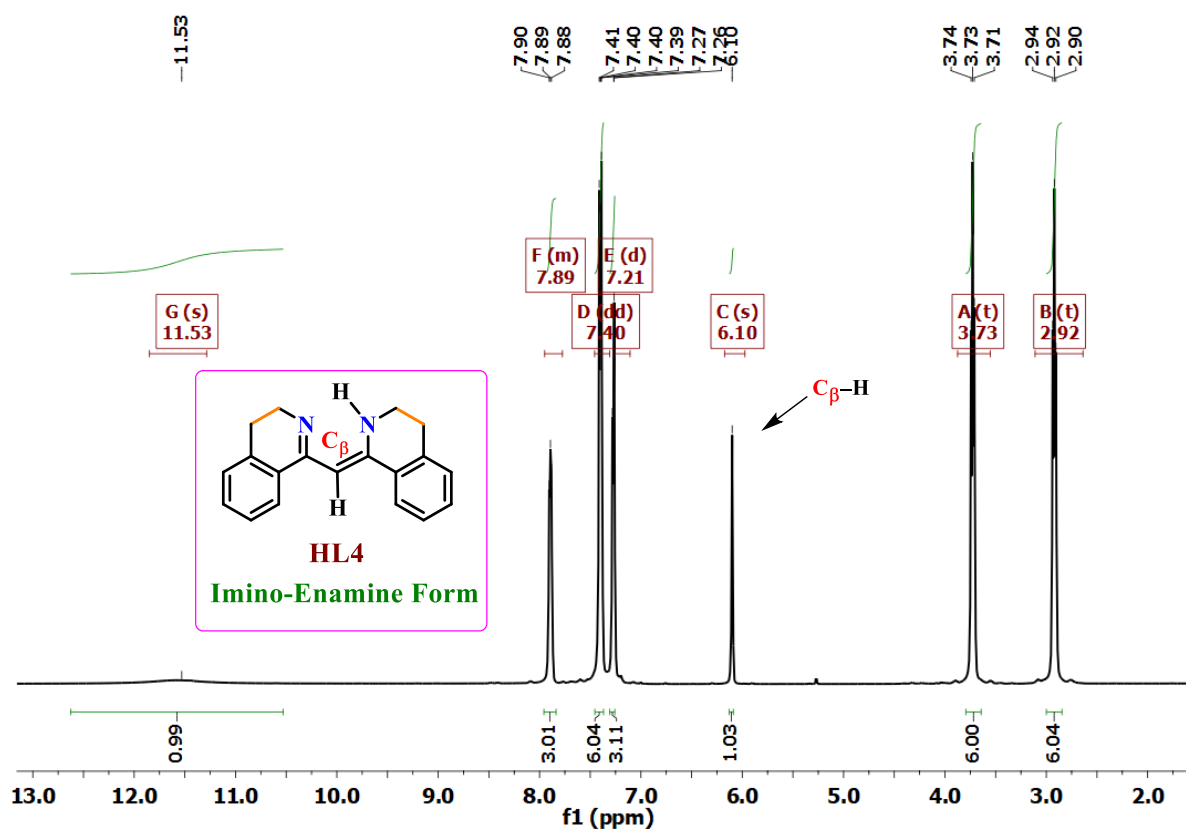

**Fig. 2j**  $^1\text{H}$  NMR of **HL4** in  $\text{CDCl}_3$  with TMS ( $\delta = 0$  ppm) as internal standard.

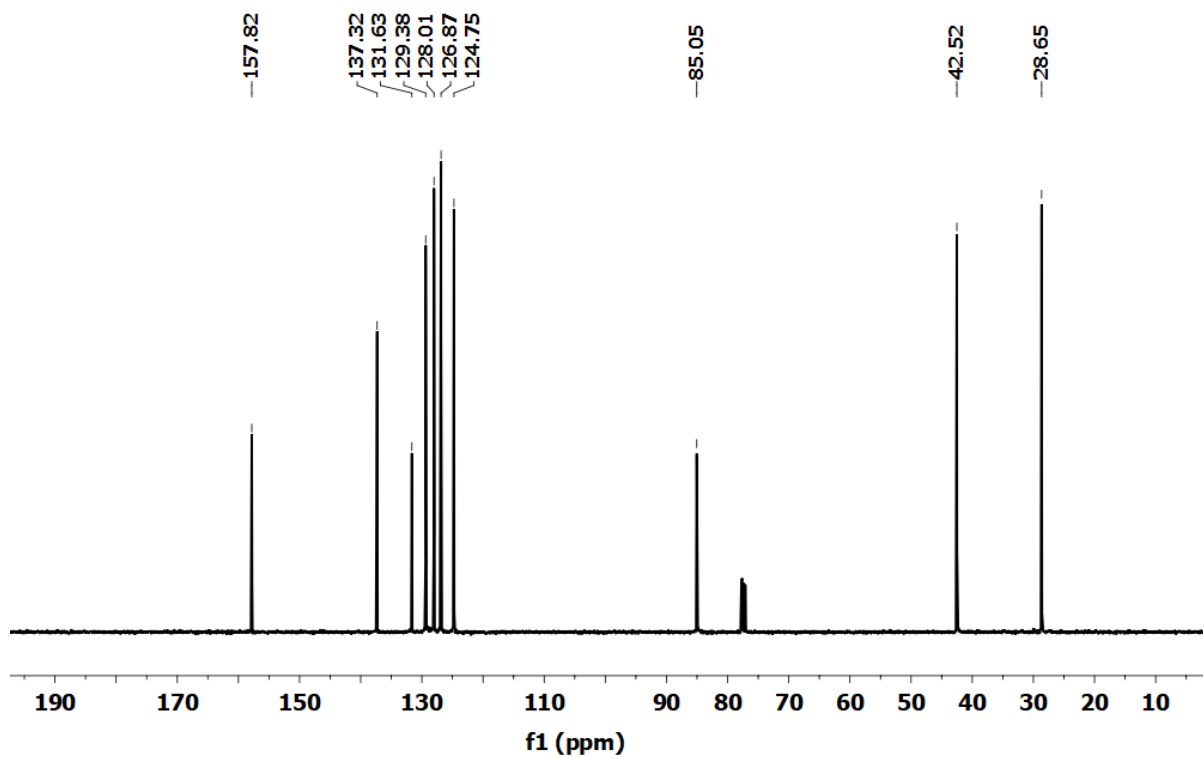

**Fig. S2k**  $^{13}\text{C}$  NMR of **HL4** in  $\text{CDCl}_3$  with TMS ( $\delta = 0$  ppm) as internal standard.

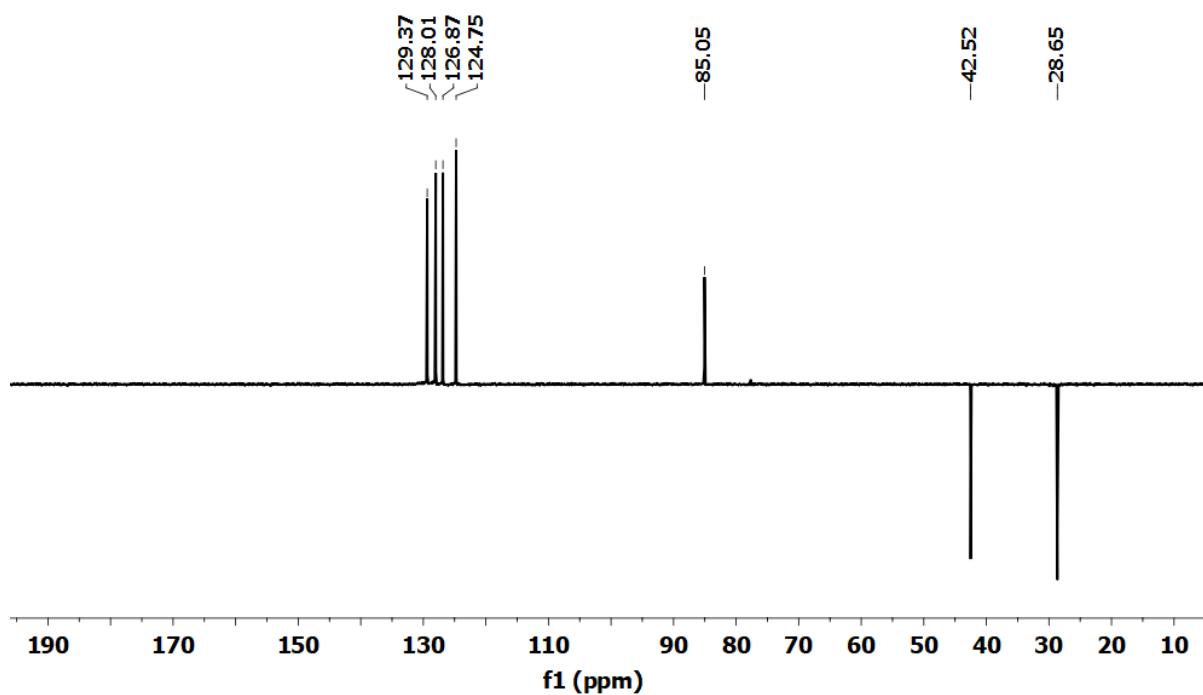

**Fig. S2l** DEPT-135 NMR of **HL4** in  $\text{CDCl}_3$  with TMS ( $\delta = 0$  ppm) as internal standard.

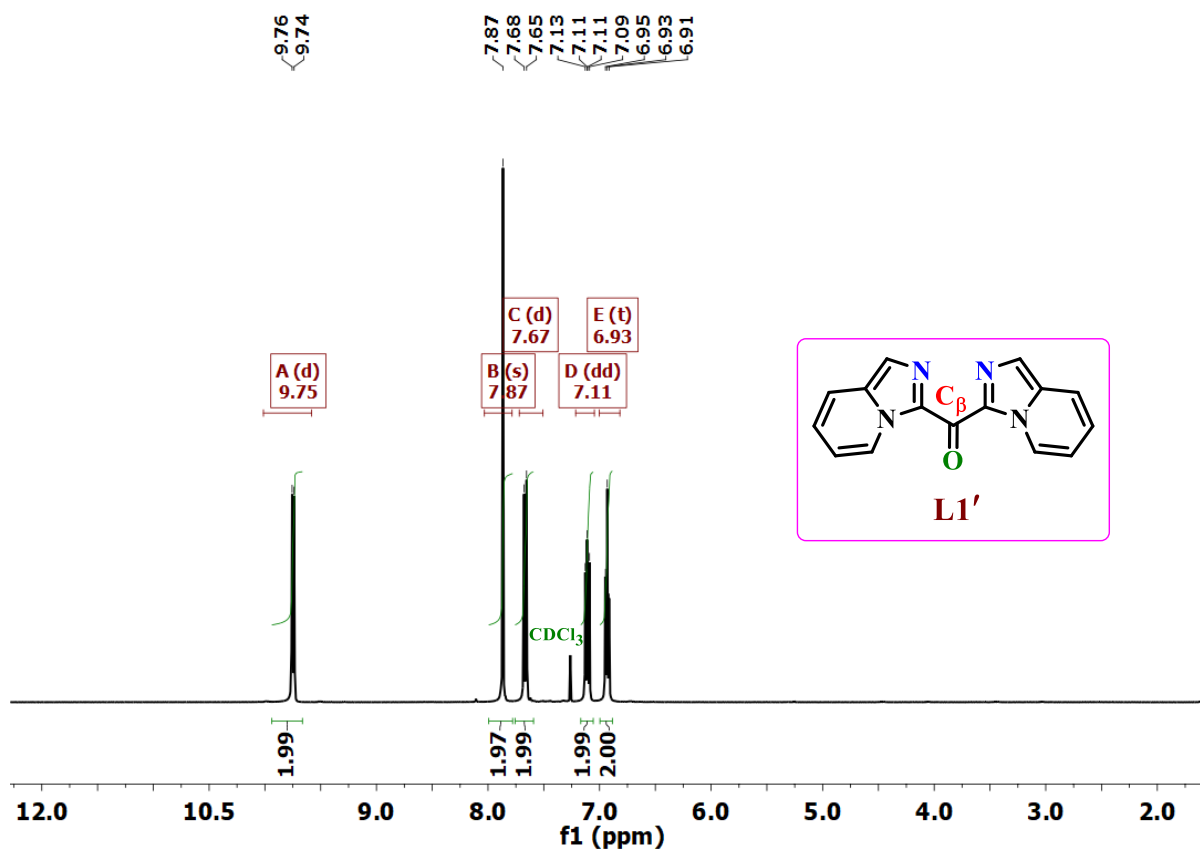

Fig. S2m  $^1H$  NMR of **L1'** in  $CDCl_3$  with TMS ( $\delta = 0$  ppm) as internal standard.

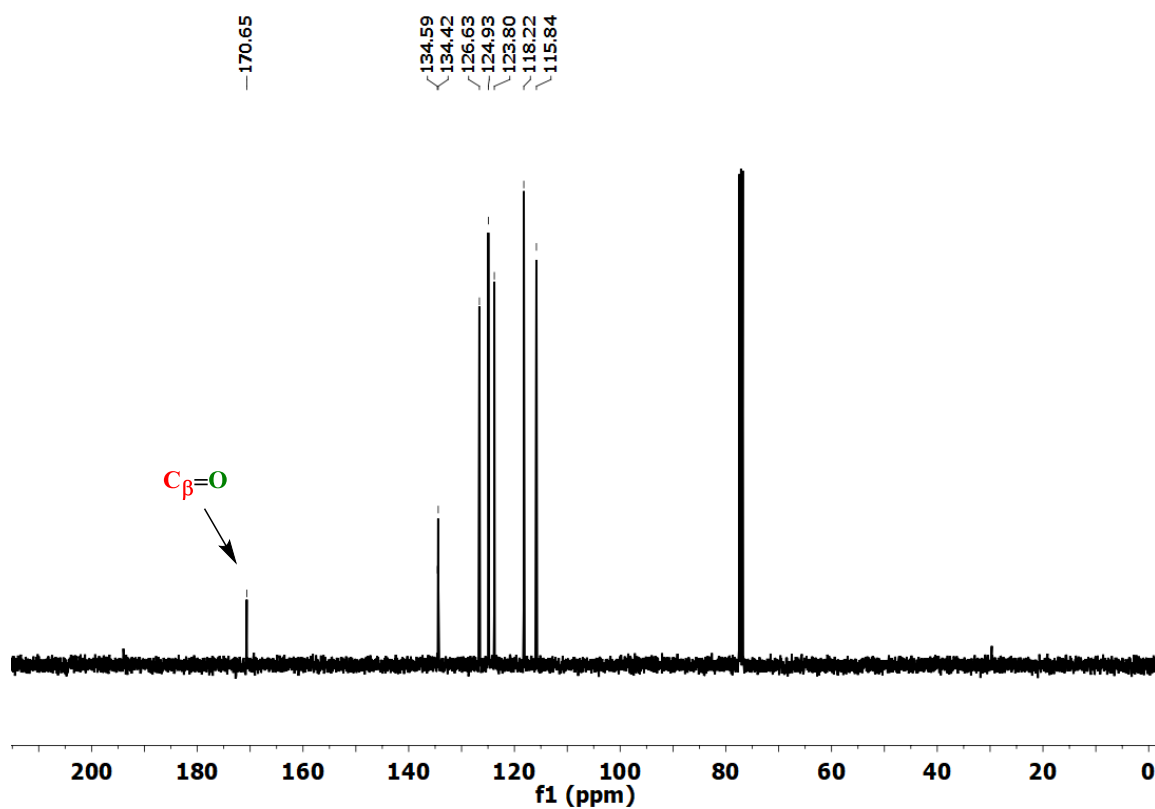

Fig. S2n  $^{13}C$  NMR of **L1'** in  $CDCl_3$  with TMS ( $\delta = 0$  ppm) as internal standard.

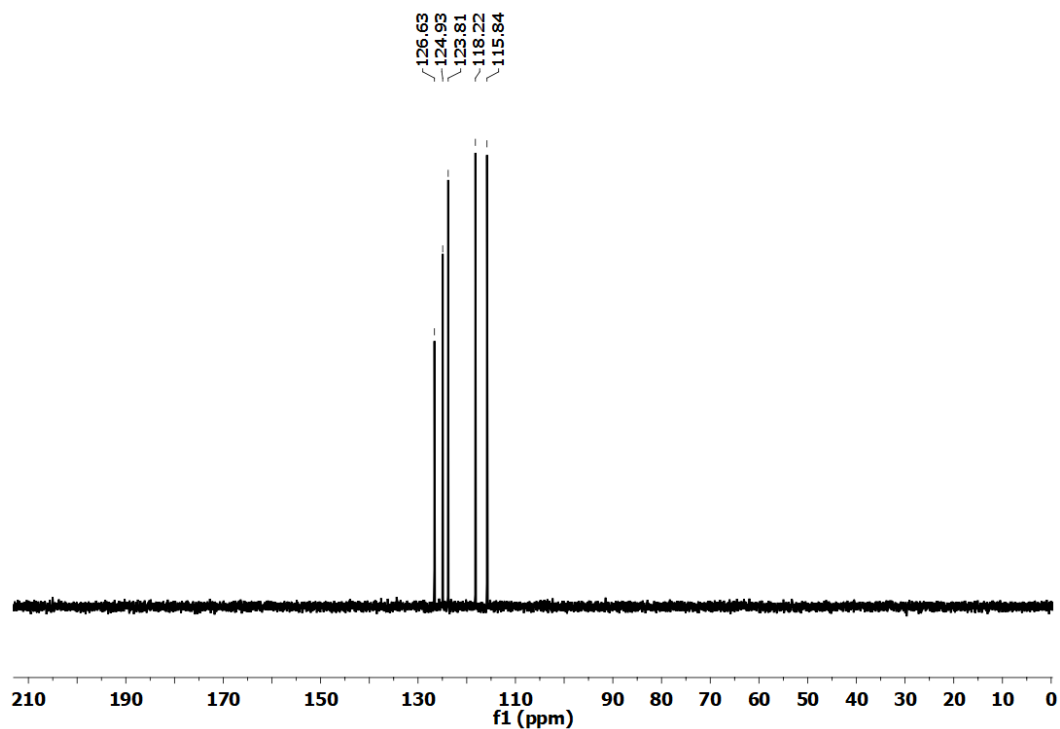

Fig. S2o DEPT-135 NMR of **L1'** in  $\text{CDCl}_3$  with TMS ( $\delta = 0$  ppm) as internal standard.

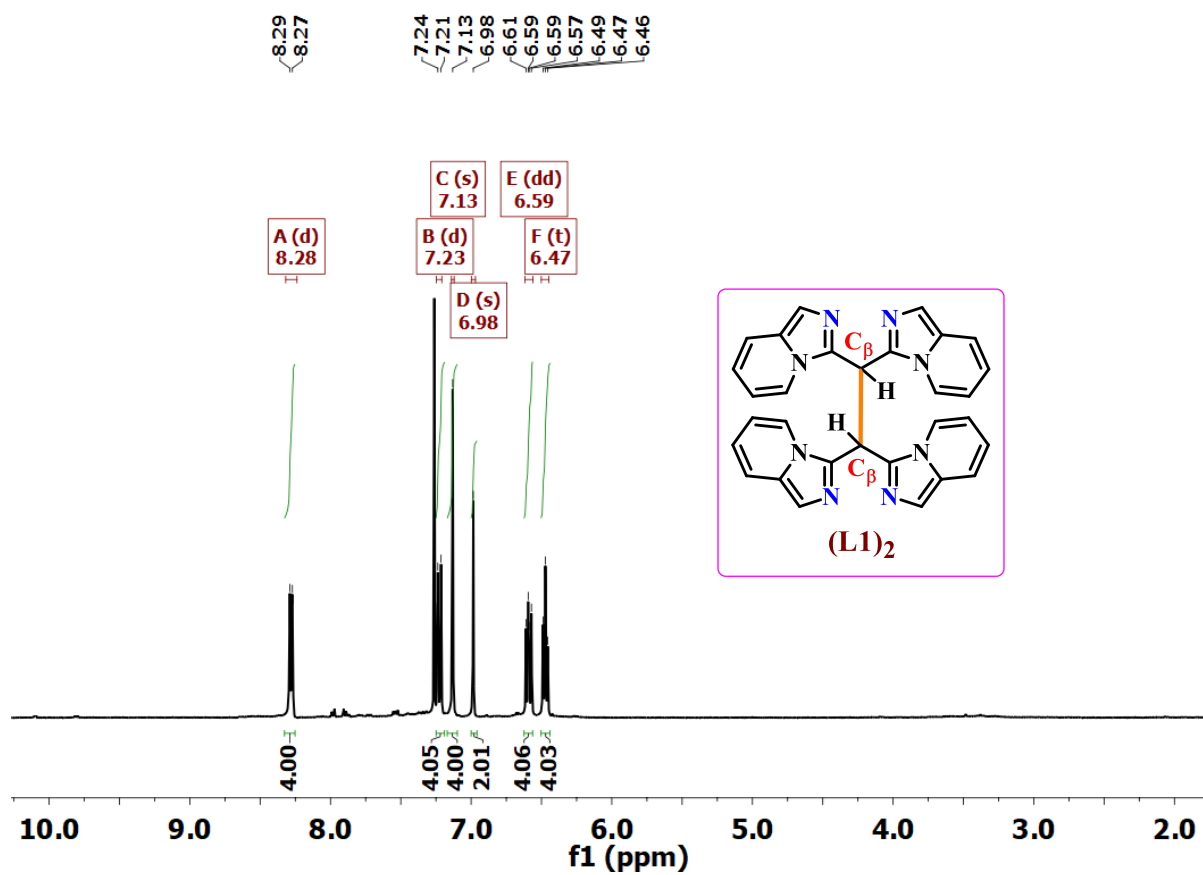

Fig. S2p  $^1\text{H}$  NMR of **(L1)<sub>2</sub>** in  $\text{CDCl}_3$  with TMS ( $\delta = 0$  ppm) as internal standard.

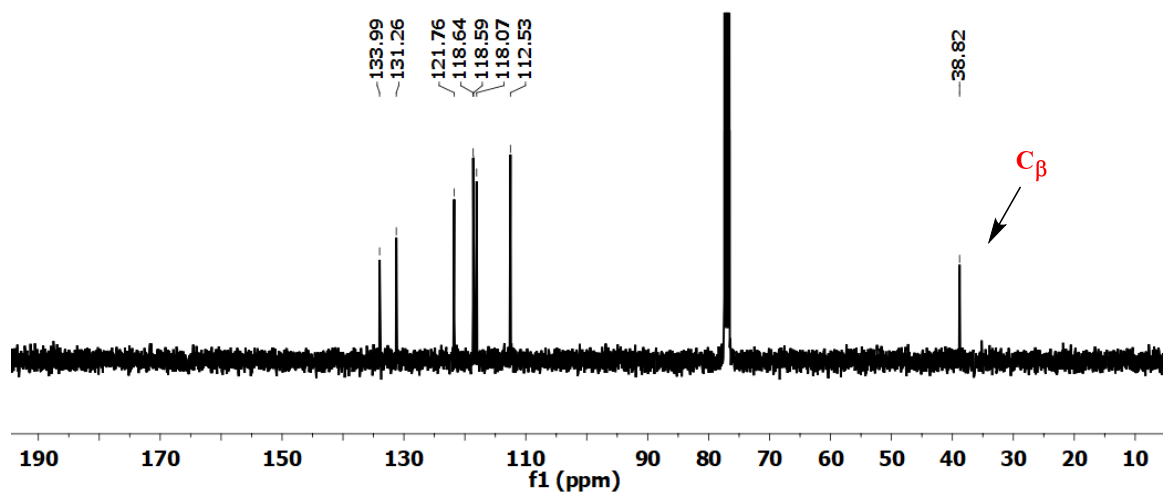

**Fig. S2q**  $^{13}\text{C}$  NMR of **(L1)<sub>2</sub>** in  $\text{CDCl}_3$  with TMS ( $\delta = 0$  ppm) as internal standard.

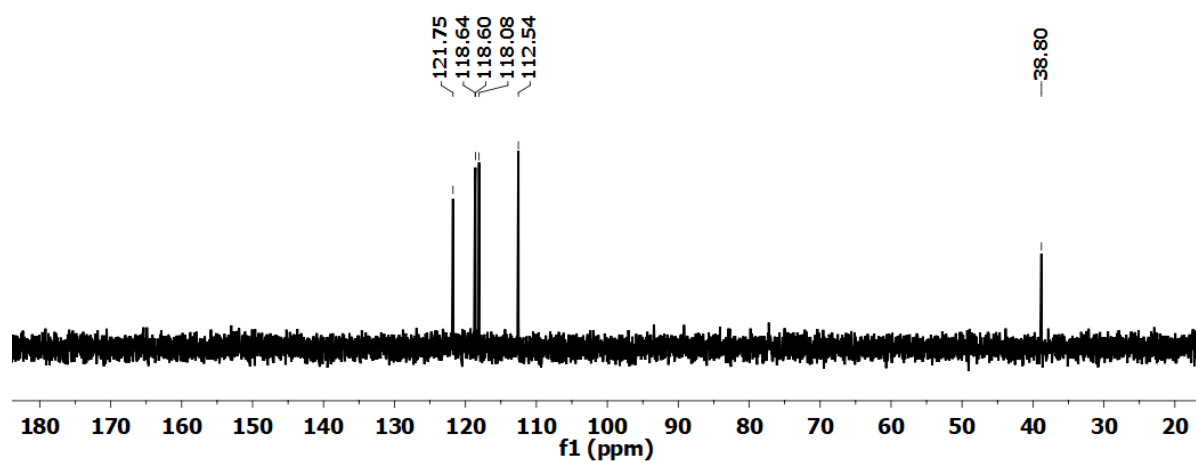

**Fig. S2r** DEPT-135 NMR of **(L1)<sub>2</sub>** in  $\text{CDCl}_3$  with TMS ( $\delta = 0$  ppm) as internal standard.

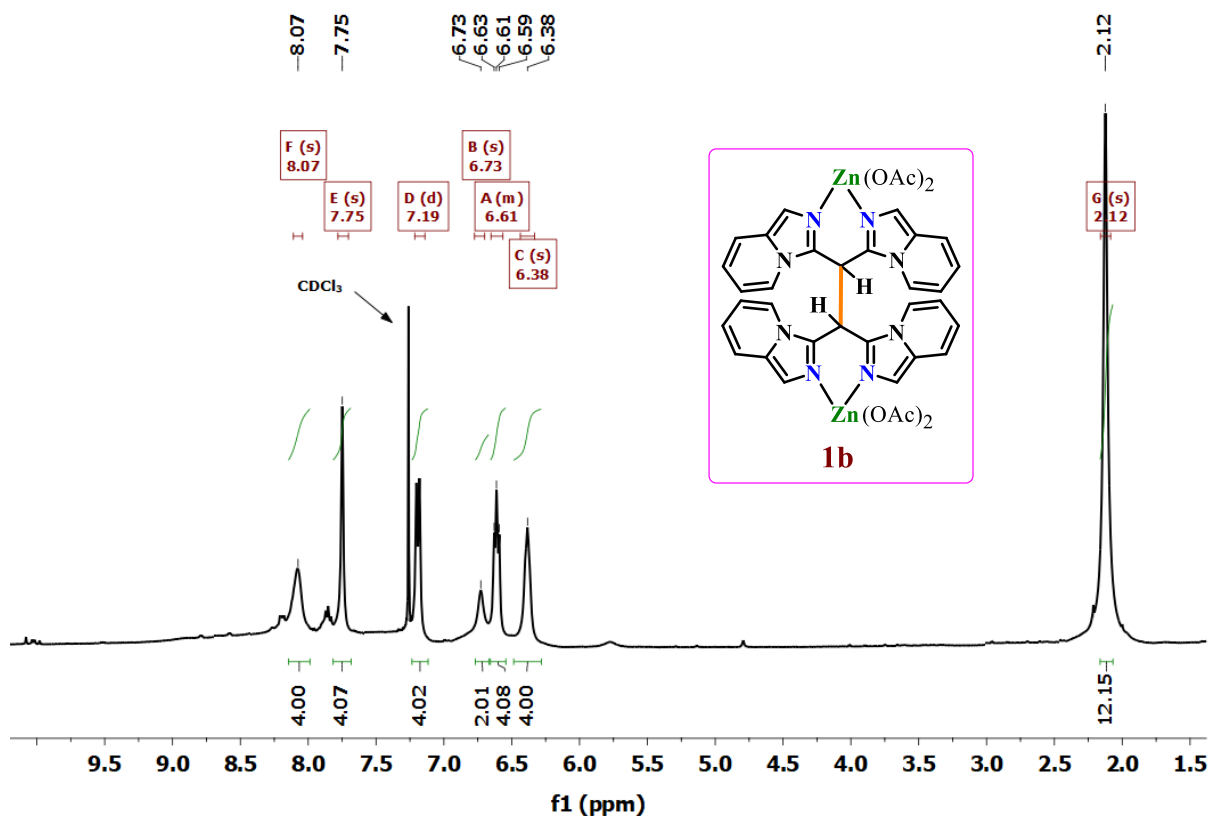

Fig. S2s  $^1\text{H}$  NMR of **1b** in  $\text{CDCl}_3$  with TMS ( $\delta = 0$  ppm) as internal standard.

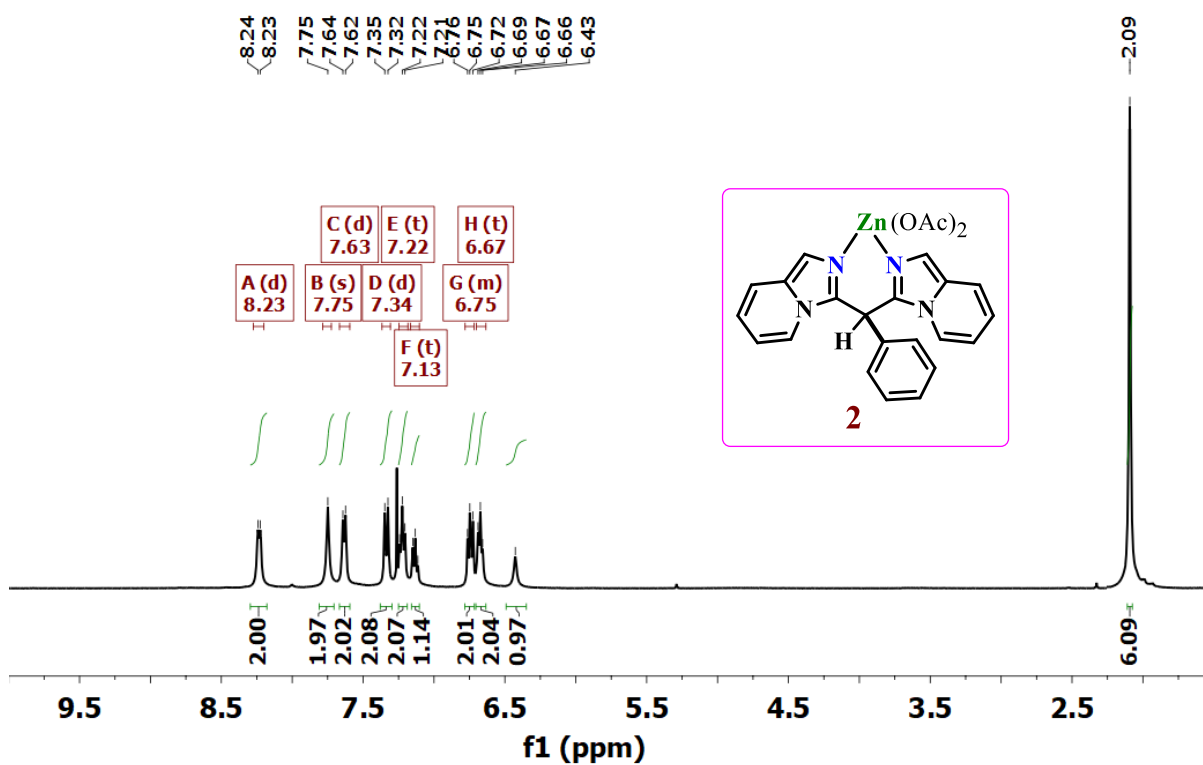

Fig. S2t  $^1\text{H}$  NMR of **2** in  $\text{CDCl}_3$  with TMS ( $\delta = 0$  ppm) as internal standard.



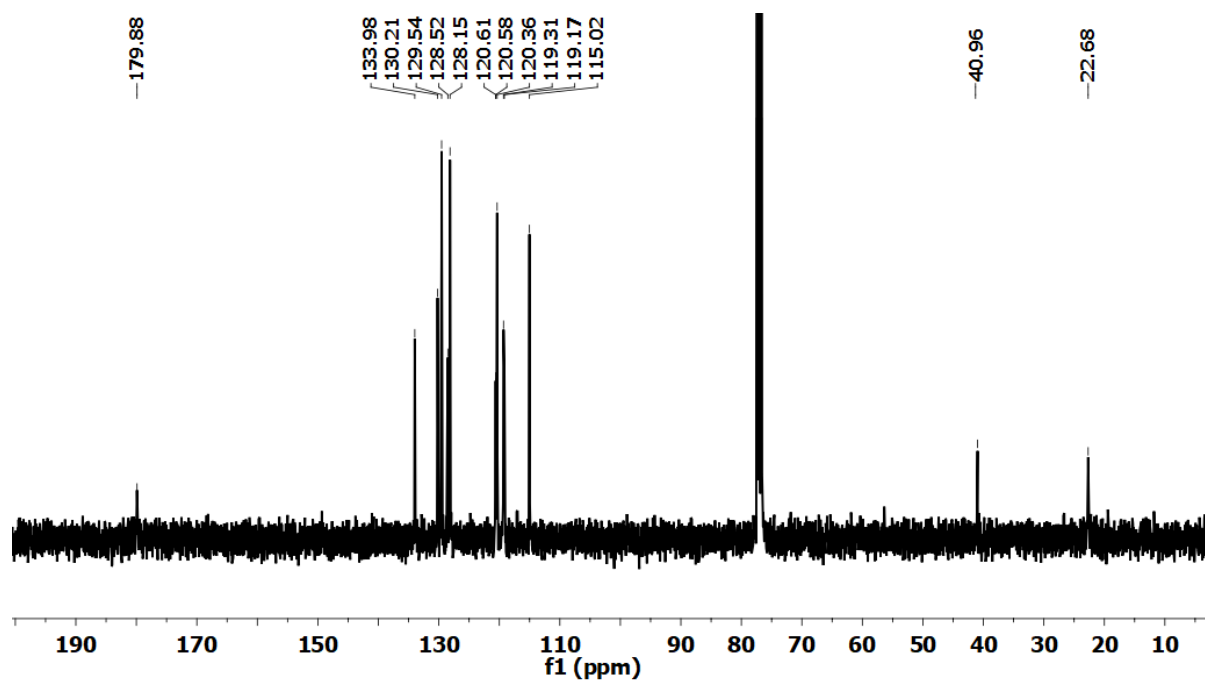

**Fig. S2u**  $^{13}\text{C}$  NMR of **2** in  $\text{CDCl}_3$  with TMS ( $\delta = 0$  ppm) as internal standard.

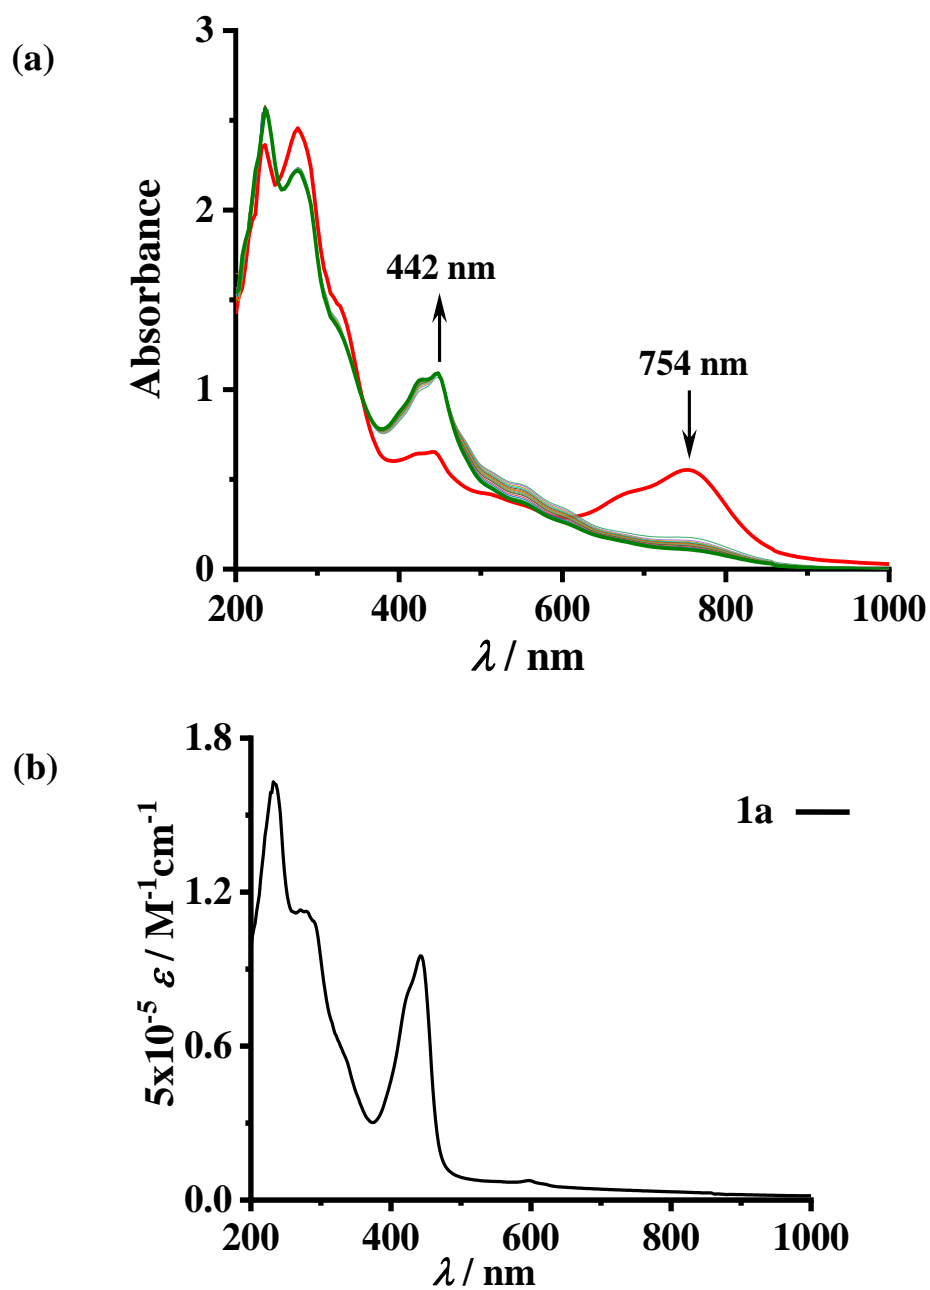

**Fig. S3** (a) Immediate change in initial spectrum (red, under  $\text{N}_2$ ) towards the formation of **1a** on exposure to air (green) at 298 K in  $\text{CH}_3\text{OH}$ . (b) UV-vis spectrum of pure **1a** in  $\text{CH}_3\text{OH}$  at 298 K.

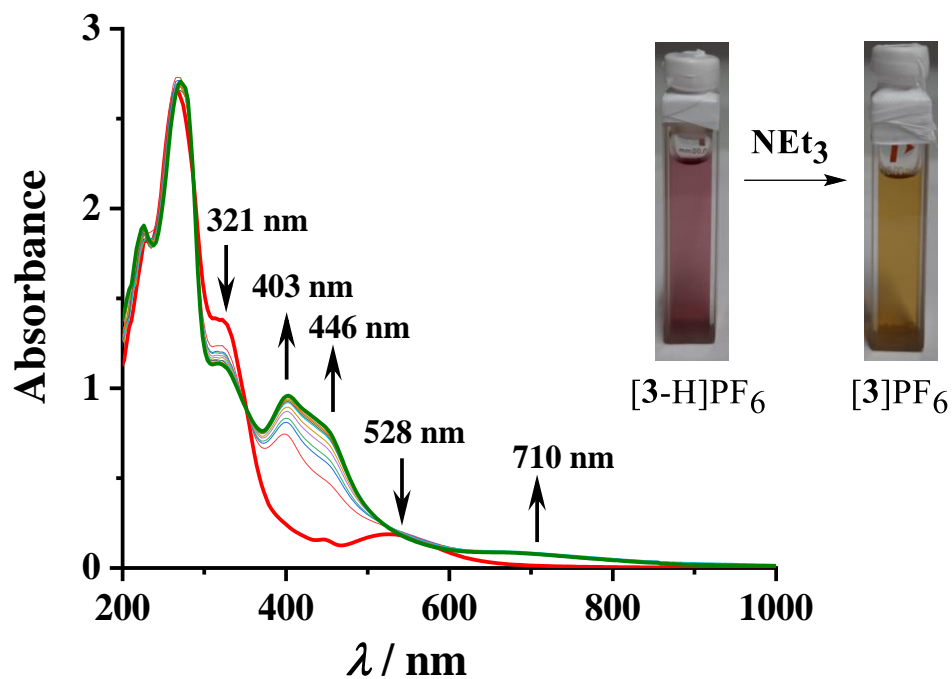

**Fig. S4** Change in UV-vis. spectra for [3-H]PF<sub>6</sub>→[3]PF<sub>6</sub> conversion (concentration  $\sim 6 \times 10^{-5}$  M) in CH<sub>3</sub>CN on addition of NEt<sub>3</sub> at 298 K. (Red line corresponds to [3-H]PF<sub>6</sub> and Green line corresponds to [3]PF<sub>6</sub>). The change was followed over a period of 4 h.

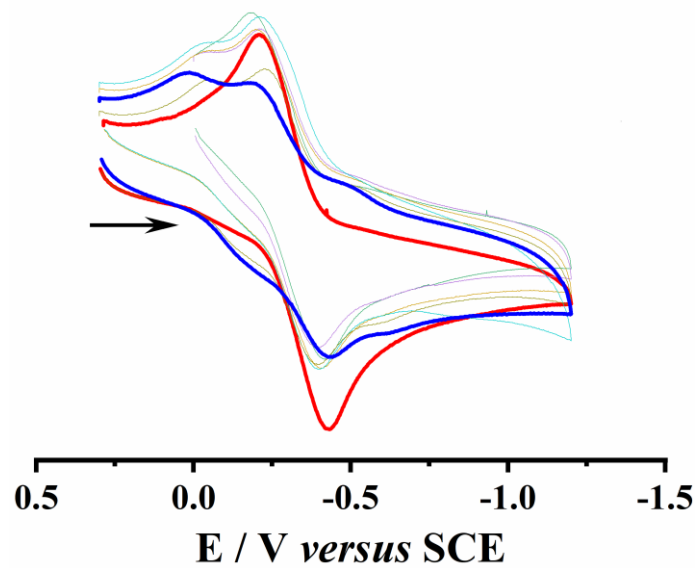

**Fig. S5** Cyclic voltammograms of [3-H]PF<sub>6</sub> (Red) and after addition of NEt<sub>3</sub> (Blue) in CH<sub>3</sub>CN/0.1 M Et<sub>4</sub>N<sup>+</sup>ClO<sub>4</sub><sup>-</sup>/SCE, GC electrode, scan rate 100 mV s<sup>-1</sup>. The change was followed over a period of 4 h.

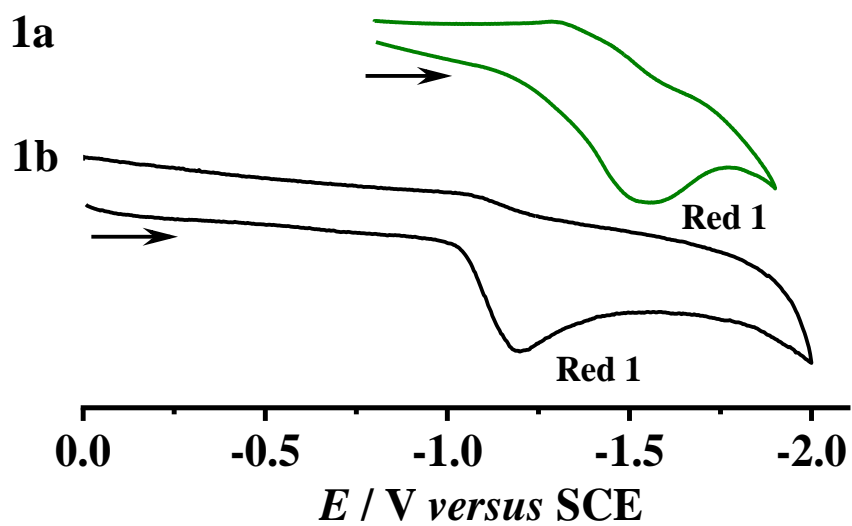

**Fig. S6** Cyclic voltammograms in  $\text{CH}_3\text{CN}/0.1 \text{ M Et}_4\text{N}^+\text{ClO}_4^-/\text{SCE}$ , GC electrode, scan rate  $100 \text{ mV s}^{-1}$ .

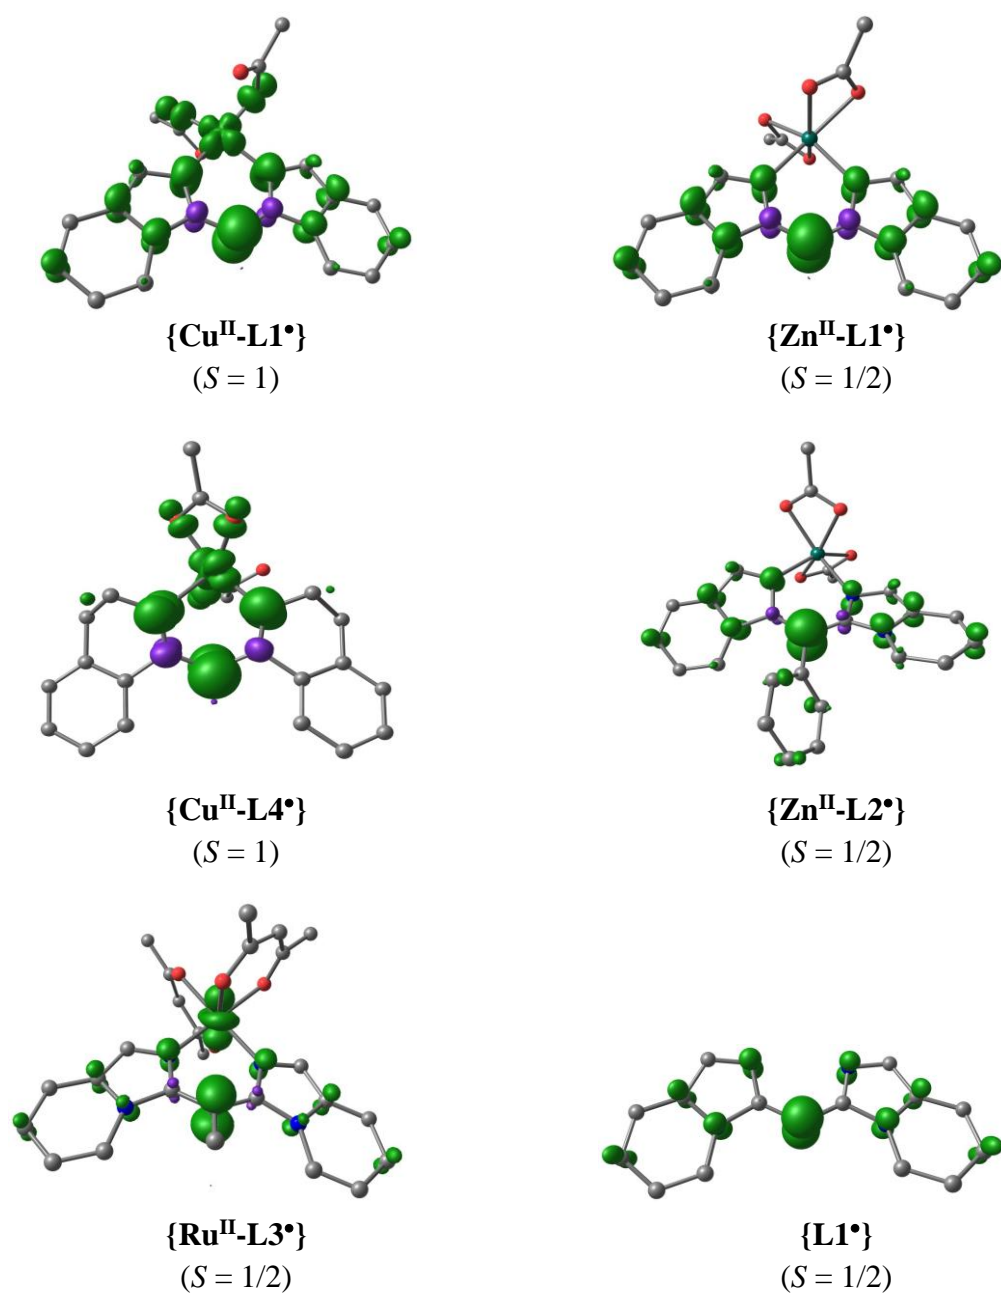

**Fig. S7** Mulliken spin density plots of in-situ generated  $\{M^{II}-L^{\bullet}\}$  (Isosurface value 0.006).

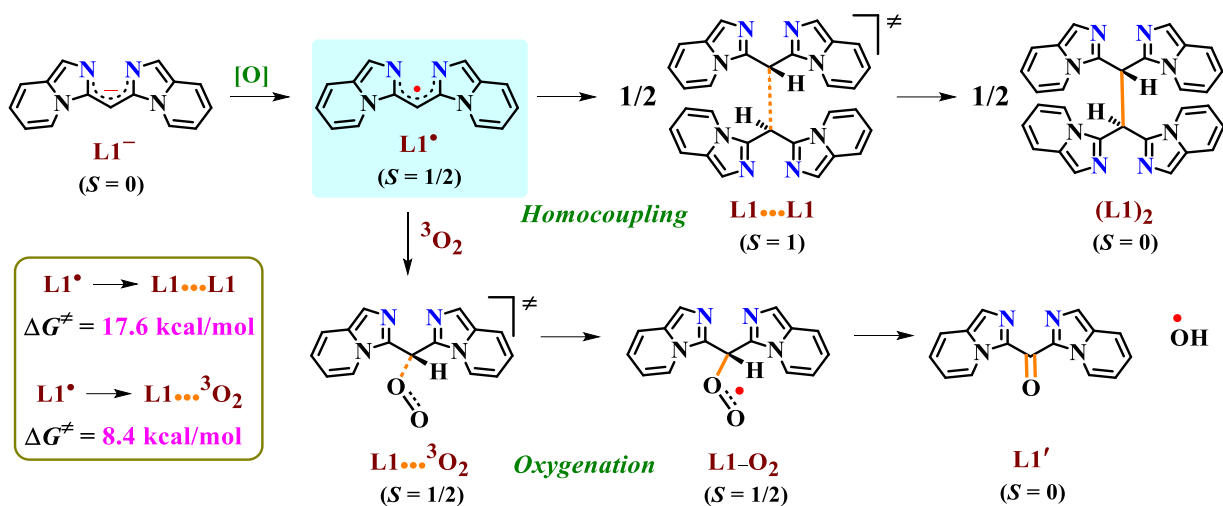

Scheme S2 Mechanistic outline for homocoupling versus oxygenation of  $L1^\bullet$ .

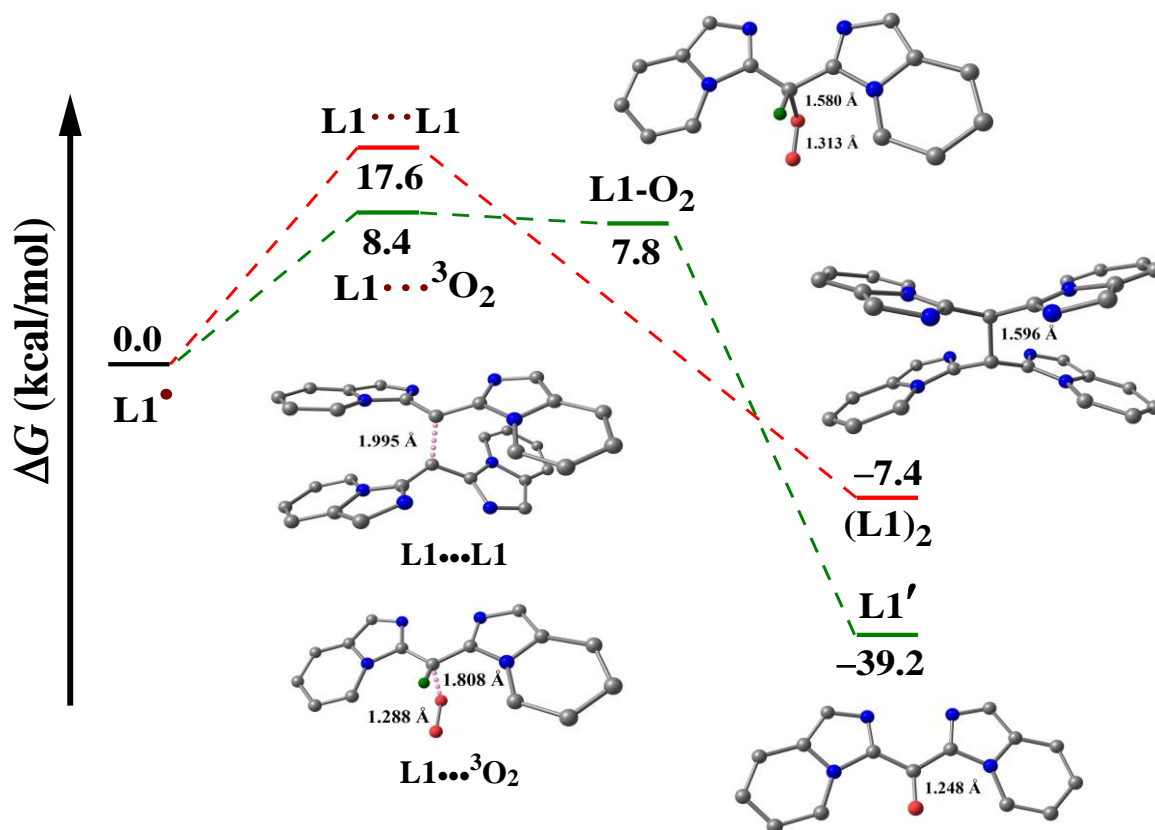

Fig. S8 Gibbs free energy ( $\Delta G$ ) profile (not to the scale) for oxygenation versus homocoupling of  $L1^\bullet$  at the M06-L level.

#### Imaginary Frequencies ( $\nu_i$ ) for the Transition State (TS)

| TS                      | $[L1 \cdots L1]^\ddagger$ | $[L1 \cdots {}^3O_2]^\ddagger$ |
|-------------------------|---------------------------|--------------------------------|
| $\nu_i, \text{cm}^{-1}$ | 1179                      | 223                            |

**Table S1** Selected crystallographic parameters

| complex                                                                     | <b>1a</b>                                                                     | <b>1b.2H<sub>2</sub>O</b>                                                      | <b>1c</b>                                                                     | (L1) <sub>2</sub> .H <sub>2</sub> O              |
|-----------------------------------------------------------------------------|-------------------------------------------------------------------------------|--------------------------------------------------------------------------------|-------------------------------------------------------------------------------|--------------------------------------------------|
| empirical formula                                                           | C <sub>38</sub> H <sub>36</sub> N <sub>8</sub> O <sub>9</sub> Cu <sub>2</sub> | C <sub>38</sub> H <sub>38</sub> N <sub>8</sub> O <sub>10</sub> Zn <sub>2</sub> | C <sub>46</sub> H <sub>44</sub> N <sub>4</sub> O <sub>8</sub> Cu <sub>2</sub> | C <sub>30</sub> H <sub>24</sub> N <sub>8</sub> O |
| formula weight                                                              | 875.83                                                                        | 897.50                                                                         | 907.93                                                                        | 512.57                                           |
| crystal system                                                              | Orthorhombic                                                                  | Triclinic                                                                      | Monoclinic                                                                    | Monoclinic                                       |
| space group                                                                 | P2 <sub>1</sub> 2 <sub>1</sub> 2 <sub>1</sub>                                 | P-1                                                                            | I2/a                                                                          | I 1 2/a 1                                        |
| <i>a</i> (Å)                                                                | 16.2048(5)                                                                    | 8.9786(4)                                                                      | 22.943(4)                                                                     | 25.4894(9)                                       |
| <i>b</i> (Å)                                                                | 22.1257(6)                                                                    | 10.6986(4)                                                                     | 8.4666(11)                                                                    | 7.8244(3)                                        |
| <i>c</i> (Å)                                                                | 22.3600(6)                                                                    | 11.1021(6)                                                                     | 23.193(4)                                                                     | 25.5780(14)                                      |
| <i>α</i> (deg)                                                              | 90                                                                            | 63.830(5)                                                                      | 90                                                                            | 90                                               |
| <i>β</i> (deg)                                                              | 90                                                                            | 87.600(4)                                                                      | 112.08(2)                                                                     | 92.559(4)                                        |
| <i>γ</i> (deg)                                                              | 90                                                                            | 75.968(4)                                                                      | 90                                                                            | 90                                               |
| <i>V</i> (Å <sup>3</sup> )                                                  | 8017.0(4)                                                                     | 925.98(8)                                                                      | 4174.7(13)                                                                    | 5096.2(4)                                        |
| <i>Z</i>                                                                    | 8                                                                             | 1                                                                              | 4                                                                             | 8                                                |
| <i>μ</i> (mm <sup>-1</sup> )                                                | 1.124                                                                         | 1.360                                                                          | 1.078                                                                         | 0.086                                            |
| <i>ρ</i> <sub>calcd</sub> (g cm <sup>-3</sup> )                             | 1.451                                                                         | 1.545                                                                          | 1.445                                                                         | 1.336                                            |
| <i>T</i> (K)                                                                | 150(2)                                                                        | 150(2)                                                                         | 150(2)                                                                        | 150(2)                                           |
| <i>F</i> (000)                                                              | 3600                                                                          | 442                                                                            | 1880                                                                          | 2144                                             |
| <i>θ</i> range (deg)                                                        | 1.886 to 29.229                                                               | 2.197 to 31.050                                                                | 1.944 to 26.442                                                               | 2.199 to<br>24.110                               |
| data/restraints<br>/parameters                                              | 14111/0/1037                                                                  | 3217/12/267                                                                    | 3648/30/273                                                                   | 4484/0/355                                       |
| <i>R</i> <sub>1</sub> , <i>wR</i> <sub>2</sub> [ <i>I</i> > 2σ( <i>I</i> )] | 0.0675, 0.1450                                                                | 0.0401, 0.0961                                                                 | 0.0996, 0.1849                                                                | 0.0698,<br>0.1638                                |
| <i>R</i> <sub>1</sub> , <i>wR</i> <sub>2</sub> (all data)                   | 0.0921, 0.1653                                                                | 0.0474, 0.1017                                                                 | 0.2161, 0.2541                                                                | 0.1097,<br>0.1975                                |
| <i>GOF</i> on <i>F</i> <sup>2</sup>                                         | 1.030                                                                         | 1.052                                                                          | 1.025                                                                         | 1.021                                            |
| largest difference in<br>peak and hole (e Å <sup>-3</sup> )                 | 0.668, -0.522                                                                 | 0.519, -0.411                                                                  | 0.591, -0.667                                                                 | 0.260, -0.293                                    |



**Table S2** Selected crystallographic parameters

| complex                                                                     | <b>2</b>                                                         | [ <b>3-H</b> ]PF <sub>6</sub>                                                    |
|-----------------------------------------------------------------------------|------------------------------------------------------------------|----------------------------------------------------------------------------------|
| empirical formula                                                           | C <sub>25</sub> H <sub>22</sub> N <sub>4</sub> O <sub>4</sub> Zn | C <sub>26</sub> H <sub>28</sub> N <sub>4</sub> O <sub>4</sub> PF <sub>6</sub> Ru |
| formula weight                                                              | 507.83                                                           | 706.56                                                                           |
| crystal system                                                              | Triclinic                                                        | Triclinic                                                                        |
| space group                                                                 | P-1                                                              | P-1                                                                              |
| <i>a</i> (Å)                                                                | 10.2232(4)                                                       | 7.8784(3)                                                                        |
| <i>b</i> (Å)                                                                | 15.4947(8)                                                       | 12.9044(5)                                                                       |
| <i>c</i> (Å)                                                                | 17.3250(9)                                                       | 14.3059(6)                                                                       |
| <i>α</i> (deg)                                                              | 107.498(5)                                                       | 72.540(4)                                                                        |
| <i>β</i> (deg)                                                              | 91.042(4)                                                        | 85.511(3)                                                                        |
| <i>γ</i> (deg)                                                              | 102.343(4)                                                       | 86.024(3)                                                                        |
| <i>V</i> (Å <sup>3</sup> )                                                  | 2546.8(2)                                                        | 1381.55(10)                                                                      |
| <i>Z</i>                                                                    | 4                                                                | 2                                                                                |
| <i>μ</i> (mm <sup>-1</sup> )                                                | 1.000                                                            | 0.707                                                                            |
| <i>ρ</i> <sub>calcd</sub> (g cm <sup>-3</sup> )                             | 1.324                                                            | 1.698                                                                            |
| <i>T</i> (K)                                                                | 150(2)                                                           | 150(2)                                                                           |
| <i>F</i> (000)                                                              | 1048                                                             | 714                                                                              |
| <i>θ</i> range (deg)                                                        | 2.400 to 30.599                                                  | 2.539 to 24.999                                                                  |
| data/restraints<br>/parameters                                              | 8902/0/617                                                       | 4827/153/448                                                                     |
| <i>R</i> <sub>1</sub> , <i>wR</i> <sub>2</sub> [ <i>I</i> > 2σ( <i>I</i> )] | 0.1004, 0.2536                                                   | 0.0540, 0.1003                                                                   |
| <i>R</i> <sub>1</sub> , <i>wR</i> <sub>2</sub> (all data)                   | 0.1468, 0.3025                                                   | 0.0782, 0.1141                                                                   |
| <i>GOF</i> on <i>F</i> <sup>2</sup>                                         | 1.029                                                            | 1.049                                                                            |
| largest difference in<br>peak and hole (e Å <sup>-3</sup> )                 | 2.641, -1.981                                                    | 0.692, -0.709                                                                    |

**Table S3** Selected experimental bond lengths (Å)<sup>a</sup>

| bond lengths | <b>1a</b> | bond lengths | <b>1c</b> | bond lengths | <b>1b.2H<sub>2</sub>O</b> | <b>2</b>  | bond lengths | (L1) <sub>2</sub> .H <sub>2</sub> O | bond lengths | [ <b>3</b> -H] PF <sub>6</sub> |
|--------------|-----------|--------------|-----------|--------------|---------------------------|-----------|--------------|-------------------------------------|--------------|--------------------------------|
| Cu1-N1       | 2.007(8)  | Cu1-N1       | 1.999(8)  | Zn1-N1       | 2.075(2)                  | 2.042(6)  | N1-C1        | 1.314(4)                            | Ru1-N1       | 2.062(4)                       |
| Cu1-N2       | 1.986(8)  | Cu1-N2       | 2.006(8)  | Zn1-N2       | 2.079(2)                  | 2.021(6)  | N2-C3        | 1.324(4)                            | Ru1-N2       | 2.045(4)                       |
| Cu1-O1       | 1.982(7)  | Cu1-O1       | 1.930(7)  | Zn1-O1       | 2.338(2)                  | 1.972(5)  | C2-C1        | 1.510(4)                            | Ru1-O1       | 1.999(3)                       |
| Cu1-O3       | 1.945(7)  | Cu1-O3       | 2.015(7)  | Zn1-O2       | 2.077(2)                  | –         | C2-C3        | 1.509(4)                            | Ru1-O2       | 1.992(3)                       |
| Cu1-O5       | 2.304(8)  | Cu1-O4       | 2.376(8)  | Zn1-O3       | 2.293(2)                  | 1.967(5)  | C2-C16       | 1.550(4)                            | Ru1-O3       | 2.018(3)                       |
| Cu2-N5       | 1.979(8)  | C2-C2'       | 1.313(18) | Zn1-O4       | 2.053(2)                  | –         | C17-N5       | 1.319(4)                            | Ru1-O4       | 2.006(3)                       |
| Cu2-N6       | 1.993(8)  | C4-C5        | 1.383(15) | N1-C1        | 1.330(3)                  | 1.344(9)  | C24-N6       | 1.321(4)                            | N1-C1        | 1.322(6)                       |
| Cu2-O5       | 1.968(7)  | N1-C1        | 1.318(11) | N2-C3        | 1.331(3)                  | 1.344(9)  | C16-C17      | 1.509(4)                            | N2-C3        | 1.335(6)                       |
| Cu2-O7       | 1.971(7)  | N2-C3        | 1.317(11) | C2-C1        | 1.502(4)                  | 1.478(10) | C16-C24      | 1.505(4)                            | C2-C1        | 1.491(6)                       |
| Cu2-O8       | 1.998(9)  | C1-C2        | 1.513(12) | C2-C3        | 1.494(3)                  | 1.472(10) |              |                                     | C2-C3        | 1.502(6)                       |
| N1-C1        | 1.348(12) | C3-C2        | 1.496(14) | C2-C2'       | 1.585(6)                  | –         |              |                                     | C2-C16       | 1.527(6)                       |
| N2-C3        | 1.327(12) | C12-C13      | 1.433(14) | C2-C16       | –                         | 1.551(10) |              |                                     |              |                                |
| C1-C2        | 1.486(14) | C21-O1       | 1.265(15) | C16-O1       | 1.247(4)                  | –         |              |                                     |              |                                |
| C3-C2        | 1.491(13) | C23-O3       | 1.298(14) | C16-O2       | 1.262(4)                  | –         |              |                                     |              |                                |
| C2-C16       | 1.606(15) | C23-O4       | 1.244(12) | C22-O1       | –                         | 1.280(11) |              |                                     |              |                                |
| C31-O1       | 1.259(13) |              |           | C22-O2       | –                         | 1.214(10) |              |                                     |              |                                |
| C31-O2       | 1.281(13) |              |           |              |                           |           |              |                                     |              |                                |

<sup>a</sup>Asymmetric units of **1a** and **2** are composed of two independent molecules (molecule A and molecule B). Bond lengths of molecule A are listed here.

**Table S4** Selected experimental bond angles (deg)

| bond angle | <b>1a</b><br>(Molecule A) | bond angle | <b>1b.2H<sub>2</sub>O</b> | bond angle | (L1) <sub>2</sub> .H <sub>2</sub> O |
|------------|---------------------------|------------|---------------------------|------------|-------------------------------------|
| N1-Cu1-N2  | 89.6(3)                   | N1-Zn1-N2  | 90.28(9)                  | C1-C2-C3   | 111.5(2)                            |
| N1-Cu1-O1  | 154.8(3)                  | N1-Zn1-O1  | 154.27(9)                 | C1-C2-C16  | 111.1(2)                            |
| N1-Cu1-O3  | 89.3(3)                   | N1-Zn1-O2  | 95.57(9)                  | C3-C2-C16  | 113.5(2)                            |
| N2-Cu1-O1  | 90.9(3)                   | N1-Zn1-O3  | 93.59(8)                  | C2-C1-N1   | 126.2(3)                            |
| N2-Cu1-O3  | 178.7(3)                  | N1-Zn1-O4  | 107.44(9)                 | C2-C3-N2   | 123.2(3)                            |
| O1-Cu1-O3  | 89.8(3)                   | N2-Zn1-O1  | 94.40(9)                  | C2-C1-N3   | 122.3(3)                            |
| N5-Cu2-N6  | 89.4(3)                   | N2-Zn1-O2  | 100.10(9)                 | N1-C1-N3   | 111.4(3)                            |
| N5-Cu2-O7  | 91.3(3)                   | N2-Zn1-O3  | 153.71(9)                 | C2-C3-N4   | 125.8(3)                            |
| N6-Cu2-O7  | 164.3(3)                  | N2-Zn1-O4  | 94.75(9)                  | N2-C3-N4   | 111.0(3)                            |
| N6-Cu2-O5  | 93.0(3)                   | O1-Zn1-O2  | 58.70(8)                  |            |                                     |
| N5-Cu2-O5  | 167.8(3)                  | O1-Zn1-O3  | 93.30(8)                  |            |                                     |
| O6-Cu2-O8  | 88.3(4)                   | O1-Zn1-O4  | 97.38(9)                  |            |                                     |
| C1-C2-C3   | 112.1(8)                  | O2-Zn1-O3  | 105.37(8)                 |            |                                     |
| C1-C2-C16  | 110.5(7)                  | O2-Zn1-O4  | 152.51(9)                 |            |                                     |
| C3-C2-C16  | 108.6(8)                  | O3-Zn1-O4  | 59.32(8)                  |            |                                     |
|            |                           | C1-C2-C3   | 112.2(2)                  |            |                                     |
|            |                           | C1-C2-C2'  | 110.9(3)                  |            |                                     |
|            |                           | C3-C2-C2'  | 109.5(3)                  |            |                                     |

**Table S5** Selected experimental bond angles (deg)

| bond angle | <b>1c</b> | bond angle | <b>2</b><br>(Molecule A) | bond angle | [ <b>3-H</b> ]PF <sub>6</sub> |
|------------|-----------|------------|--------------------------|------------|-------------------------------|
| N1-Cu1-N2  | 90.1(3)   | N1-Zn1-N2  | 90.9(2)                  | N1-Ru1-N2  | 86.85(15)                     |
| N1-Cu1-O1  | 168.3(3)  | N1-Zn1-O1  | 118.3(2)                 | N1-Ru1-O1  | 178.59(15)                    |
| N1-Cu1-O3  | 94.7(3)   | N1-Zn1-O3  | 104.2(2)                 | N1-Ru1-O2  | 87.73(13)                     |
| N1-Cu1-O4  | 98.5(3)   | N2-Zn1-O1  | 107.4(3)                 | N1-Ru1-O3  | 93.11(14)                     |
| N2-Cu1-O1  | 91.4(3)   | N2-Zn1-O3  | 112.2(2)                 | N1-Ru1-O4  | 94.24(14)                     |
| N2-Cu1-O3  | 163.2(4)  | O1-Zn1-O3  | 120.2(2)                 | N2-Ru1-O1  | 91.75(14)                     |
| N2-Cu1-O4  | 103.7(3)  | C1-C2-C3   | 114.8(6)                 | N2-Ru1-O2  | 91.54(14)                     |
| O1-Cu1-O3  | 87.2(3)   | C1-C2-C16  | 110.4(6)                 | N2-Ru1-O3  | 179.69(14)                    |
| O1-Cu1-O4  | 92.4(3)   | C3-C2-C16  | 110.2(6)                 | N2-Ru1-O4  | 88.96(14)                     |
| O3-Cu1-O4  | 59.7(3)   |            |                          | O1-Ru1-O2  | 92.12(12)                     |
| C1-C2-C3   | 115.0(8)  |            |                          | O1-Ru1-O3  | 88.29(13)                     |
| C1-C2-C2'  | 123.2(12) |            |                          | O1-Ru1-O4  | 85.92(12)                     |
| C3-C2-C2'  | 121.8(11) |            |                          | O2-Ru1-O3  | 88.15(13)                     |
|            |           |            |                          | O2-Ru1-O4  | 177.99(13)                    |
|            |           |            |                          | O3-Ru1-O4  | 91.35(13)                     |
|            |           |            |                          | C1-C2-C3   | 111.2(4)                      |
|            |           |            |                          | C1-C2-C16  | 113.3(4)                      |
|            |           |            |                          | C3-C2-C16  | 111.9(4)                      |

**Table S6** EPR data in CH<sub>3</sub>CN-toluene (1:1) at 100 K<sup>a</sup>

| Complex                                   | $g_{1/2}$ | $g_1$ | $g_2$ | $g_3$ | $g_{\parallel}$ | $A_{\parallel}$<br>(mT) | $g_{\perp}$ | $\langle g \rangle^b$ | $\Delta g^c$ |
|-------------------------------------------|-----------|-------|-------|-------|-----------------|-------------------------|-------------|-----------------------|--------------|
| <b>1a</b> (two $S=1/2$ )                  | -         | -     | -     | -     | 2.199           | 17.6                    | 1.997       | -                     | -            |
| <b>1c</b> ( $S=1$ )                       | 5.168     | -     | -     | -     | 2.381           | 16.2                    | 2.074       | -                     | -            |
| [ <b>3</b> ]PF <sub>6</sub> ( $S=1$ )     | 4.690     | 2.415 | 2.188 | 1.823 |                 |                         |             | 2.156                 | 0.592        |
| [ <b>3-H</b> ]PF <sub>6</sub> ( $S=1/2$ ) | -         | 2.494 | 2.127 | 1.703 |                 |                         |             | 2.133                 | 0.791        |

<sup>a</sup>EPR spectra in CH<sub>3</sub>CN-toluene/ 0.1 M Et<sub>4</sub>N<sup>+</sup>ClO<sub>4</sub><sup>-</sup> at 100 K. <sup>b</sup> $\langle g \rangle = \{(1/3)(g_1^2 + g_2^2 + g_3^2)\}^{1/2}$ , <sup>c</sup> $\Delta g = g_1 - g_3$ .

**Table S7** Electrochemical data<sup>a</sup>

| complex                       | $E^\circ$ [V] ( $\Delta E_p$ [mV]) <sup>b</sup> |           |
|-------------------------------|-------------------------------------------------|-----------|
|                               | Red1                                            | Red2      |
| [ <b>3</b> ]PF <sub>6</sub>   | -0.07(60)                                       | -0.29(90) |
| [ <b>3-H</b> ]PF <sub>6</sub> | -0.33(270)                                      | -         |

<sup>a</sup>From cyclic voltammetry in CH<sub>3</sub>CN/0.1 M Et<sub>4</sub>NClO<sub>4</sub> at 100 mVs<sup>-1</sup>. <sup>b</sup>Potentials in V versus SCE; peak potential differences  $\Delta E/mV$  (in parentheses).

**Table S8** DFT calculated (M06L/LanL2DZ/6-31G\*\*) Mulliken spin densities

| complex                                                                                       | Cu/Zn  | Ru    | L(C $\beta$ ) | OAc   | acac  |
|-----------------------------------------------------------------------------------------------|--------|-------|---------------|-------|-------|
| <b>{Cu<sup>II</sup>-L1<sup>-</sup>}</b> for <b>1a</b><br>(S=1/2)                              | 0.603  | -     | 0.165(0.004)  | 0.232 | -     |
| <b>{Cu<sup>II</sup>-L1<sup>•</sup>}</b> for <b>1a</b><br>(S=1)                                | 0.603  | -     | 1.109(0.459)  | 0.288 | -     |
| <b>1a</b> (S=1)<br><b>{Cu<sup>II</sup>(<math>\mu</math>-(L1)<sub>2</sub>Cu<sup>II</sup>)}</b> | 1.211  | -     | 0.190(0.001)  | 0.599 | -     |
| <b>{Zn<sup>II</sup>-L1<sup>•</sup>}</b> for <b>1b</b><br>(S=1/2)                              | -0.003 | -     | 1.001(0.466)  | 0.002 | -     |
| <b>{Cu<sup>II</sup>-L4<sup>-</sup>}</b> for <b>1c</b><br>(S=1/2)                              | 0.552  | -     | 0.229(0.011)  | 0.219 | -     |
| <b>{Cu<sup>II</sup>-L4<sup>•</sup>}</b> for <b>1c</b><br>(S=1)                                | 0.588  | -     | 1.064(0.640)  | 0.348 | -     |
| <b>1c</b> (S=1)<br><b>{Cu<sup>II</sup>(<math>\mu</math>-(L4)<sub>2</sub>Cu<sup>II</sup>)}</b> | 1.064  | -     | 0.339(0.012)  | 0.597 | -     |
| <b>3</b> (S=1/2)<br><b>{Ru<sup>II</sup>-L3<sup>•</sup>}</b>                                   | -      | 0.302 | 0.681(0.397)  | -     | 0.017 |
| <b>3<sup>+</sup></b> (S=1)<br><b>{Ru<sup>III</sup>-L3<sup>•</sup>}</b>                        | -      | 0.812 | 0.978(0.499)  | -     | 0.210 |
| <b>[3-H]<sup>+</sup></b> (S=1/2)<br><b>{Ru<sup>III</sup>-HL3<sup>-</sup>}</b>                 | -      | 0.790 | 0.004(-0.001) | -     | 0.206 |

**Table S9** DFT calculated selected MO compositions at (U)B3LYP level

| complex <sup>a</sup>                                                                    | MO     | fragments   | % contribution |
|-----------------------------------------------------------------------------------------|--------|-------------|----------------|
| <b>{Cu<sup>II</sup>-L1<sup>-</sup>}</b> for <b>1a</b><br>( <i>S</i> =1/2)               | SOMO   | L1/Cu/ OAc  | 98/1/1         |
|                                                                                         | β-LUMO | L1/Cu/ OAc  | 23/57/21       |
| <b>{Cu<sup>II</sup>-L1<sup>•</sup>}</b> for <b>1a</b><br>( <i>S</i> =1)                 | SOMO   | L1/Cu/ OAc  | 98/1/1         |
|                                                                                         | β-LUMO | L1/Cu/ OAc  | 98/1/1         |
| <b>1a</b> ( <i>S</i> =1)<br><b>{Cu<sup>II</sup>(μ-(L1)<sub>2</sub>Cu<sup>II</sup>)}</b> | SOMO   | L1/Cu/ OAc  | 100/0/0        |
|                                                                                         | β-LUMO | L1/Cu/ OAc  | 61/11/28       |
| <b>{Zn<sup>II</sup>-L1<sup>-</sup>}</b> for <b>1b</b><br>( <i>S</i> =0)                 | HOMO   | L1/Zn/ OAc  | 99/0/0         |
|                                                                                         | LUMO   | L1/Zn/ OAc  | 99/0/0         |
| <b>{Zn<sup>II</sup>-L1<sup>•</sup>}</b> for <b>1b</b><br>( <i>S</i> =1/2)               | SOMO   | L1/Zn/ OAc  | 99/0/0         |
|                                                                                         | β-LUMO | L1/Zn/ OAc  | 99/0/0         |
| <b>1b</b> ( <i>S</i> =0)<br><b>{Zn<sup>II</sup>(μ-(L1)<sub>2</sub>Zn<sup>II</sup>)}</b> | SOMO   | L1/Zn/ OAc  | 100/0/0        |
|                                                                                         | β-LUMO | L1/Zn/ OAc  | 98/1/2         |
| <b>{Cu<sup>II</sup>-L4<sup>-</sup>}</b> for <b>1c</b><br>( <i>S</i> =1/2)               | HOMO   | L4/Cu/ OAc  | 91/4/5         |
|                                                                                         | LUMO   | L4/Cu/ OAc  | 36/48/16       |
| <b>{Cu<sup>II</sup>-L4<sup>•</sup>}</b> for <b>1c</b><br>( <i>S</i> =1)                 | SOMO   | L4/Cu/ OAc  | 9/14/76        |
|                                                                                         | β-LUMO | L4/Cu/ OAc  | 86/7/7         |
| <b>1c</b> ( <i>S</i> =1)<br><b>{Cu<sup>II</sup>(μ-(L4)<sub>2</sub>Cu<sup>II</sup>)}</b> | SOMO   | L4/Cu/ OAc  | 7/13/80        |
|                                                                                         | β-LUMO | L4/Cu/ OAc  | 27/53/20       |
| <b>3<sup>-</sup></b> ( <i>S</i> =0)<br><b>{Ru<sup>II</sup>-L3<sup>-</sup>}</b>          | HOMO   | L3/Ru/ acac | 80/16/3        |
|                                                                                         | LUMO   | L3/Ru/ acac | 95/2/3         |
| <b>3</b> ( <i>S</i> =1/2)<br><b>{Ru<sup>II</sup>-L3<sup>•</sup>}</b>                    | SOMO   | L3/Ru/ acac | 83/14/3        |
|                                                                                         | β-LUMO | L3/Ru/ acac | 98/1/0         |
| <b>3<sup>+</sup></b> ( <i>S</i> =1)<br><b>{Ru<sup>III</sup>-L3<sup>•</sup>}</b>         | SOMO   | L3/Ru/ acac | 94/5/1         |
|                                                                                         | β-LUMO | L3/Ru/ acac | 98/1/1         |
| <b>[3-H]<sup>+</sup></b> ( <i>S</i> =1/2)<br><b>{Ru<sup>III</sup>-HL3<sup>-</sup>}</b>  | SOMO   | L3/Ru/ acac | 12/48/41       |
|                                                                                         | β-LUMO | L3/Ru/ acac | 9/70/21        |

<sup>a</sup>DFT optimized stable configuration are considered here.



**Table S10** Composition and energies of selected molecular orbitals of  $L^-$  ( $S=0$ )

| MO     | energy (eV) | % composition |           |
|--------|-------------|---------------|-----------|
|        |             | ring          | $C_\beta$ |
| HOMO-5 | -2.354      | 0.98          | 0.02      |
| HOMO-4 | -2.185      | 0.99          | 0.01      |
| HOMO-3 | -1.606      | 0.85          | 0.15      |
| HOMO-2 | -1.481      | 0.99          | 0.01      |
| HOMO-1 | -0.614      | 1.00          | 0.00      |
| HOMO   | 1.350       | 0.68          | 0.32      |
| LUMO   | 2.015       | 1.00          | 0.00      |
| LUMO+1 | 2.327       | 1.00          | 0.00      |
| LUMO+2 | 3.725       | 1.00          | 0.00      |
| LUMO+3 | 4.156       | 0.95          | 0.05      |
| LUMO+4 | 5.560       | 0.98          | 0.02      |
| LUMO+5 | 6.725       | 0.93          | 0.07      |

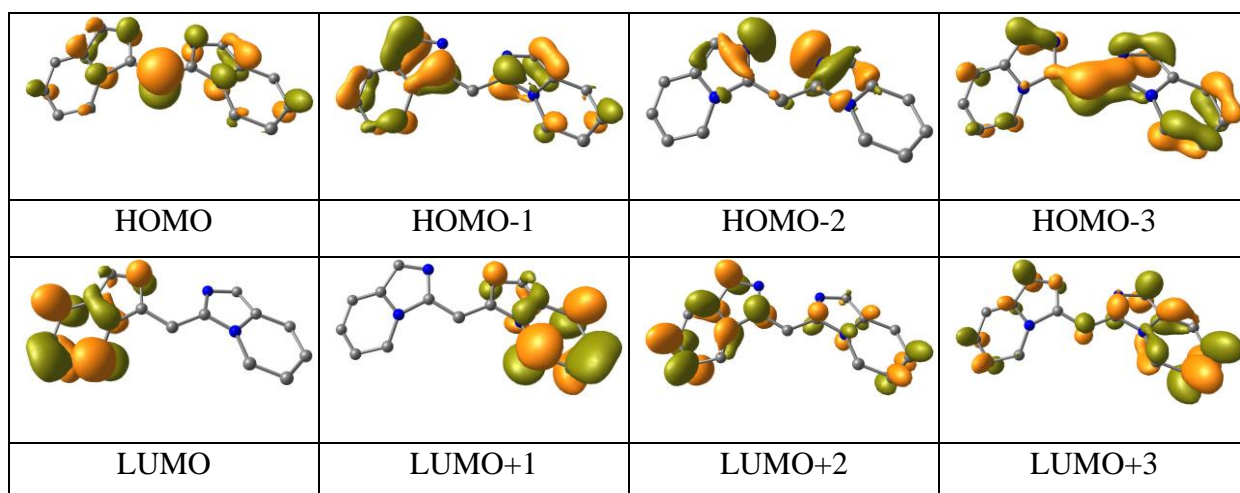

**Table S11** Composition and energies of selected molecular orbitals of **L1•** ( $S=1/2$ )

| MO             | energy (eV) | % composition |      |
|----------------|-------------|---------------|------|
|                |             | azo           | ring |
| $\alpha$ -spin |             |               |      |
| HOMO-5         | -6.572      | 1.00          | 0.00 |
| HOMO-4         | -6.417      | 0.98          | 0.02 |
| HOMO-3         | -6.167      | 0.86          | 0.14 |
| HOMO-2         | -6.003      | 0.99          | 0.01 |
| HOMO-1         | -4.893      | 1.00          | 0.00 |
| SOMO           | -3.499      | 0.77          | 0.23 |
| LUMO           | -1.663      | 1.00          | 0.00 |
| LUMO+1         | -1.654      | 1.00          | 0.00 |
| LUMO+2         | -0.632      | 1.00          | 0.00 |
| LUMO+3         | -0.051      | 0.95          | 0.05 |
| LUMO+4         | 1.119       | 1.00          | 0.00 |
| LUMO+5         | 1.564       | 0.86          | 0.14 |
| $\beta$ -spin  |             |               |      |
| HOMO-5         | -3.880      | 0.89          | 0.11 |
| HOMO-4         | -3.472      | 0.99          | 0.01 |
| HOMO-3         | -3.081      | 0.99          | 0.01 |
| HOMO-2         | -3.069      | 0.99          | 0.01 |
| HOMO-1         | -2.463      | 0.89          | 0.11 |
| HOMO           | -2.347      | 1.00          | 0.00 |
| LUMO           | 1.223       | 0.74          | 0.26 |
| LUMO+1         | 2.859       | 1.00          | 0.00 |
| LUMO+2         | 2.959       | 1.00          | 0.00 |
| LUMO+3         | 3.023       | 1.00          | 0.00 |
| LUMO+4         | 3.760       | 0.94          | 0.06 |
| LUMO+5         | 3.769       | 0.99          | 0.01 |

| $\alpha$ -spin                                                                     |                                                                                    |                                                                                     |                                                                                      |
|------------------------------------------------------------------------------------|------------------------------------------------------------------------------------|-------------------------------------------------------------------------------------|--------------------------------------------------------------------------------------|
| 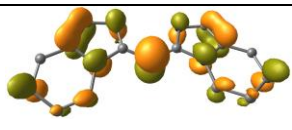  |   |   |   |
| SOMO                                                                               | HOMO-1                                                                             | HOMO-2                                                                              | HOMO-3                                                                               |
|   |   |   |   |
| LUMO                                                                               | LUMO+1                                                                             | LUMO+2                                                                              | LUMO+3                                                                               |
| $\beta$ -spin                                                                      |                                                                                    |                                                                                     |                                                                                      |
|   |   |   |   |
| HOMO                                                                               | HOMO-1                                                                             | HOMO-2                                                                              | HOMO-3                                                                               |
|  |  |  |  |
| LUMO                                                                               | LUMO+1                                                                             | LUMO+2                                                                              | LUMO+3                                                                               |

**Table S12** Composition and energies of selected molecular orbitals of **(L1)<sub>2</sub>** (*S*=0)

| MO     | energy (eV) | % composition |      |
|--------|-------------|---------------|------|
|        |             | azo           | ring |
| HOMO-5 | -5.635      | 1.00          | 0.00 |
| HOMO-4 | -5.603      | 0.99          | 0.01 |
| HOMO-3 | -4.822      | 0.99          | 0.01 |
| HOMO-2 | -4.753      | 0.92          | 0.08 |
| HOMO-1 | -4.600      | 0.90          | 0.10 |
| HOMO   | -4.424      | 1.00          | 0.00 |
| LUMO   | -1.528      | 0.96          | 0.04 |
| LUMO+1 | -1.463      | 1.00          | 0.00 |
| LUMO+2 | -1.372      | 1.00          | 0.00 |
| LUMO+3 | -1.340      | 1.00          | 0.00 |
| LUMO+4 | -0.829      | 0.85          | 0.15 |
| LUMO+5 | -0.338      | 0.99          | 0.01 |

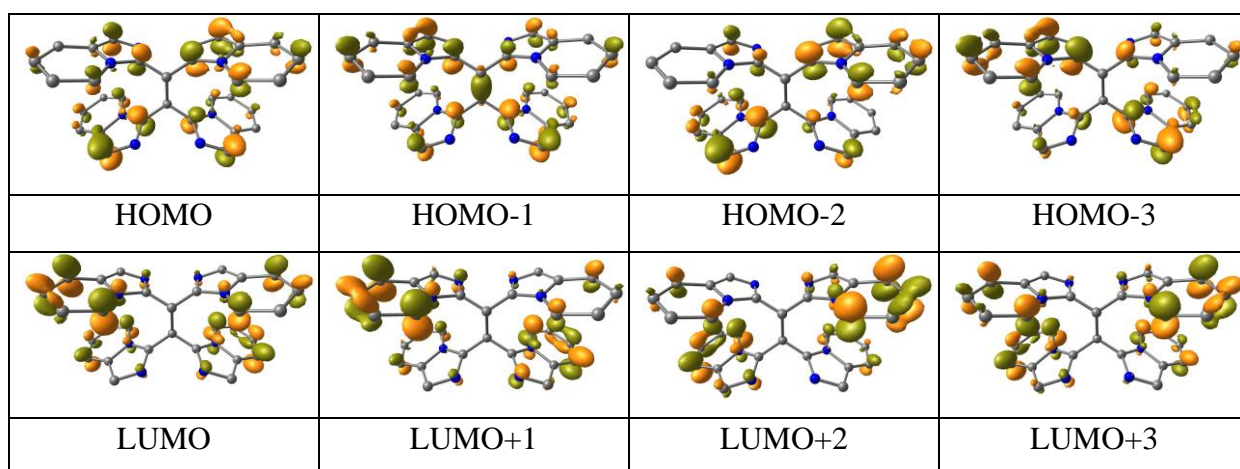

**Table S13** Composition and energies of selected molecular orbitals of {Cu<sup>II</sup>-L1<sup>-</sup>} (*S*=1/2)

| MO             | energy (eV) | % composition |      |      |
|----------------|-------------|---------------|------|------|
|                |             | Cu            | L1   | OAc  |
| $\alpha$ -spin |             |               |      |      |
| HOMO-5         | -3.328      | 0.01          | 0.07 | 0.92 |
| HOMO-4         | -2.903      | 0.04          | 0.03 | 0.92 |
| HOMO-3         | -2.728      | 0.10          | 0.01 | 0.89 |
| HOMO-2         | -2.711      | 0.22          | 0.22 | 0.56 |
| HOMO-1         | -2.425      | 0.00          | 1.00 | 0.00 |
| SOMO           | -0.662      | 0.01          | 0.98 | 0.01 |
| LUMO           | 1.806       | 0.01          | 0.99 | 0.00 |
| LUMO+1         | 1.870       | 0.00          | 1.00 | 0.00 |
| LUMO+2         | 2.971       | 0.01          | 0.99 | 0.01 |
| LUMO+3         | 3.587       | 0.07          | 0.91 | 0.02 |
| LUMO+4         | 3.942       | 0.70          | 0.18 | 0.13 |
| LUMO+5         | 3.964       | 0.62          | 0.23 | 0.15 |
| $\beta$ -spin  |             |               |      |      |
| HOMO-5         | -3.335      | 0.05          | 0.03 | 0.91 |
| HOMO-4         | -3.250      | 0.01          | 0.07 | 0.92 |
| HOMO-3         | -2.881      | 0.03          | 0.02 | 0.95 |
| HOMO-2         | -2.583      | 0.15          | 0.01 | 0.84 |
| HOMO-1         | -2.426      | 0.00          | 0.99 | 0.00 |
| HOMO           | -0.648      | 0.02          | 0.97 | 0.01 |
| LUMO           | 1.143       | 0.57          | 0.23 | 0.21 |
| LUMO+1         | 1.832       | 0.02          | 0.96 | 0.01 |
| LUMO+2         | 1.881       | 0.00          | 1.00 | 0.00 |
| LUMO+3         | 2.977       | 0.00          | 0.99 | 0.01 |
| LUMO+4         | 3.590       | 0.07          | 0.91 | 0.02 |
| LUMO+5         | 3.946       | 0.70          | 0.18 | 0.13 |

| $\alpha$ -spin                                                                      |                                                                                     |                                                                                      |                                                                                       |
|-------------------------------------------------------------------------------------|-------------------------------------------------------------------------------------|--------------------------------------------------------------------------------------|---------------------------------------------------------------------------------------|
| 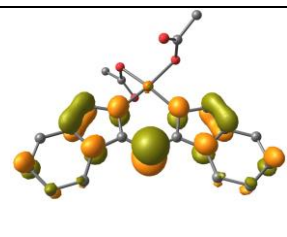   |    |    |    |
| SOMO                                                                                | HOMO-1                                                                              | HOMO-2                                                                               | HOMO-3                                                                                |
|    |    |    |    |
| LUMO                                                                                | LUMO+1                                                                              | LUMO+2                                                                               | LUMO+3                                                                                |
| $\beta$ -spin                                                                       |                                                                                     |                                                                                      |                                                                                       |
|   |   |   |   |
| HOMO                                                                                | HOMO-1                                                                              | HOMO-2                                                                               | HOMO-3                                                                                |
|  |  |  |  |
| LUMO                                                                                | LUMO+1                                                                              | LUMO+2                                                                               | LUMO+3                                                                                |

**Table S14** Composition and energies of selected molecular orbitals of {Cu<sup>II</sup>-L1•} (S=1)

| MO             | energy (eV) | % composition |      |      |
|----------------|-------------|---------------|------|------|
|                |             | Cu            | L1   | OAc  |
| $\alpha$ -spin |             |               |      |      |
| HOMO-5         | -6.231      | 0.02          | 0.06 | 0.92 |
| HOMO-4         | -6.066      | 0.00          | 0.99 | 0.01 |
| HOMO-3         | -5.881      | 0.14          | 0.10 | 0.77 |
| HOMO-2         | -5.729      | 0.14          | 0.11 | 0.75 |
| SOMO 2         | -5.493      | 0.13          | 0.02 | 0.85 |
| SOMO 1         | -4.665      | 0.01          | 0.98 | 0.01 |
| LUMO           | -1.727      | 0.01          | 0.99 | 0.00 |
| LUMO+1         | -1.672      | 0.00          | 1.00 | 0.00 |
| LUMO+2         | -0.726      | 0.00          | 0.99 | 0.01 |
| LUMO+3         | -0.049      | 0.01          | 0.98 | 0.01 |
| LUMO+4         | 0.912       | 0.00          | 0.99 | 0.01 |
| LUMO+5         | 1.062       | 0.14          | 0.84 | 0.01 |
| $\beta$ -spin  |             |               |      |      |
| HOMO-5         | -6.782      | 0.13          | 0.10 | 0.77 |
| HOMO-4         | -6.203      | 0.05          | 0.04 | 0.91 |
| HOMO-3         | -6.142      | 0.01          | 0.06 | 0.93 |
| HOMO-2         | -5.837      | 0.00          | 1.00 | 0.00 |
| HOMO-1         | -5.783      | 0.05          | 0.02 | 0.93 |
| HOMO           | -5.281      | 0.17          | 0.02 | 0.81 |
| LUMO           | -3.141      | 0.01          | 0.98 | 0.01 |
| LUMO+1         | -1.991      | 0.57          | 0.19 | 0.23 |
| LUMO+2         | -1.589      | 0.02          | 0.98 | 0.01 |
| LUMO+3         | -1.544      | 0.00          | 1.00 | 0.00 |
| LUMO+4         | -0.547      | 0.00          | 0.99 | 0.01 |
| LUMO+5         | 0.211       | 0.02          | 0.97 | 0.01 |

| $\alpha$ -spin                                                                      |                                                                                     |                                                                                      |                                                                                       |
|-------------------------------------------------------------------------------------|-------------------------------------------------------------------------------------|--------------------------------------------------------------------------------------|---------------------------------------------------------------------------------------|
| 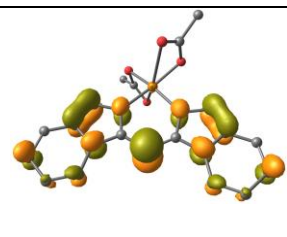   |    |    |    |
| SOMO 1                                                                              | SOMO 2                                                                              | HOMO-2                                                                               | HOMO-3                                                                                |
|    |    |    |    |
| LUMO                                                                                | LUMO+1                                                                              | LUMO+2                                                                               | LUMO+3                                                                                |
| $\beta$ -spin                                                                       |                                                                                     |                                                                                      |                                                                                       |
|   |   |   |   |
| HOMO                                                                                | HOMO-1                                                                              | HOMO-2                                                                               | HOMO-3                                                                                |
|  |  |  |  |
| LUMO                                                                                | LUMO+1                                                                              | LUMO+2                                                                               | LUMO+3                                                                                |



**Table S15** Composition and energies of selected molecular orbitals of **1a**, {Cu<sup>II</sup>(μ-(L1)<sub>2</sub>)Cu<sup>II</sup>} (S=1)

| MO     | energy (eV) | % composition |                   |      |
|--------|-------------|---------------|-------------------|------|
|        |             | Cu            | (L1) <sub>2</sub> | OAc  |
| α-spin |             |               |                   |      |
| HOMO-5 | -6.223      | 0.10          | 0.07              | 0.83 |
| HOMO-4 | -6.121      | 0.14          | 0.05              | 0.82 |
| HOMO-3 | -5.969      | 0.00          | 0.97              | 0.02 |
| HOMO-2 | -5.879      | 0.00          | 0.98              | 0.01 |
| SOMO 2 | -5.715      | 0.00          | 0.98              | 0.02 |
| SOMO 1 | -5.520      | 0.00          | 1.00              | 0.00 |
| LUMO   | -1.466      | 0.01          | 0.98              | 0.01 |
| LUMO+1 | -1.392      | 0.00          | 0.99              | 0.00 |
| LUMO+2 | -1.248      | 0.02          | 0.97              | 0.01 |
| LUMO+3 | -1.185      | 0.01          | 0.99              | 0.01 |
| LUMO+4 | -1.016      | 0.02          | 0.97              | 0.01 |
| LUMO+5 | -0.437      | 0.00          | 0.99              | 0.01 |
| β-spin |             |               |                   |      |
| HOMO-5 | -6.080      | 0.17          | 0.10              | 0.73 |
| HOMO-4 | -5.979      | 0.01          | 0.93              | 0.06 |
| HOMO-3 | -5.925      | 0.17          | 0.12              | 0.71 |
| HOMO-2 | -5.878      | 0.02          | 0.90              | 0.08 |
| HOMO-1 | -5.714      | 0.01          | 0.97              | 0.03 |
| HOMO   | -5.524      | 0.00          | 0.99              | 0.00 |
| LUMO   | -2.852      | 0.61          | 0.11              | 0.28 |
| LUMO+1 | -2.576      | 0.59          | 0.18              | 0.23 |
| LUMO+2 | -1.455      | 0.01          | 0.98              | 0.01 |
| LUMO+3 | -1.383      | 0.00          | 0.99              | 0.00 |
| LUMO+4 | -1.241      | 0.02          | 0.97              | 0.01 |
| LUMO+5 | -1.179      | 0.00          | 0.99              | 0.01 |

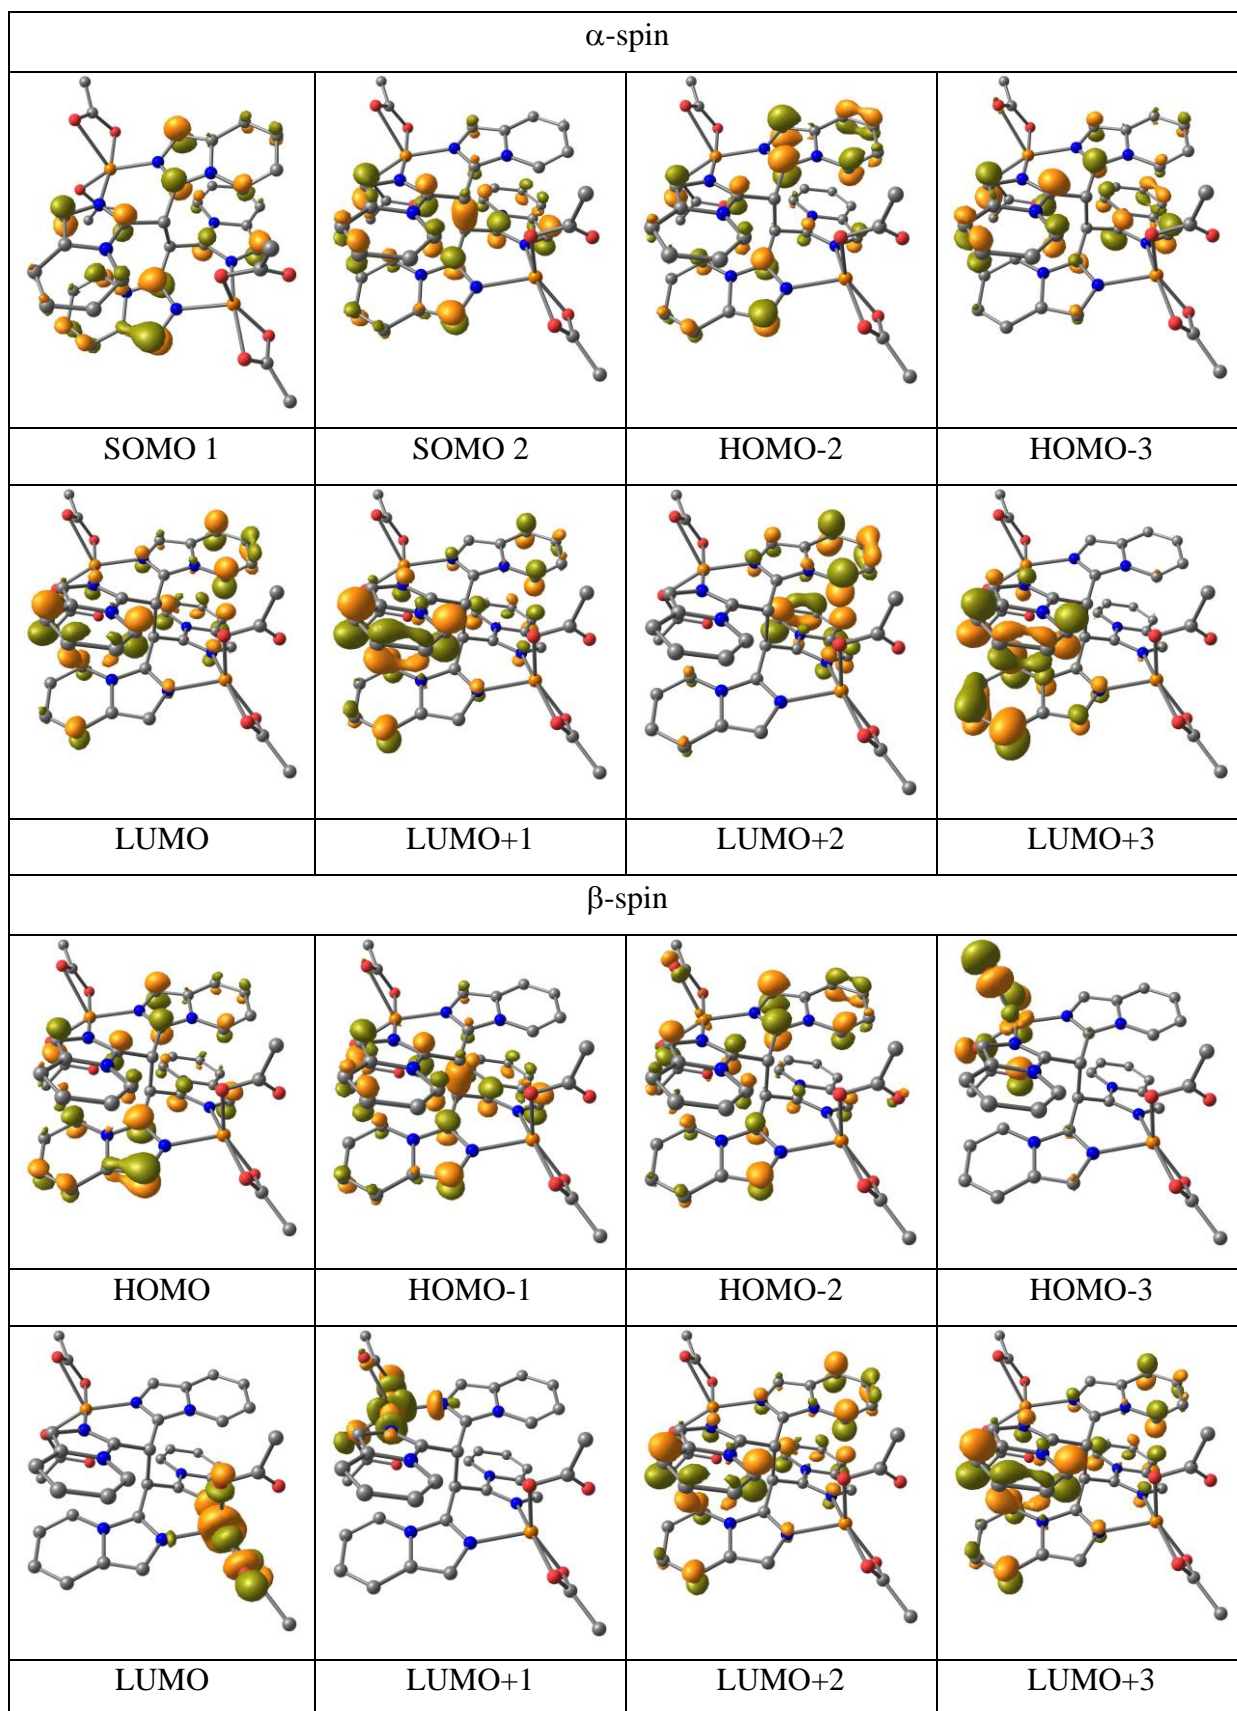

**Table S16** Composition and energies of selected molecular orbitals of  $\{\text{Zn}^{\text{II}}\text{-L1}^-\}$  ( $S=0$ )

| MO     | energy (eV) | % composition |      |      |
|--------|-------------|---------------|------|------|
|        |             | Zn            | L1   | OAc  |
| HOMO-5 | -3.733      | 0.00          | 0.03 | 0.97 |
| HOMO-4 | -3.422      | 0.05          | 0.16 | 0.79 |
| HOMO-3 | -3.340      | 0.00          | 0.94 | 0.06 |
| HOMO-2 | -3.266      | 0.04          | 0.03 | 0.93 |
| HOMO-1 | -2.017      | 0.00          | 1.00 | 0.00 |
| HOMO   | -0.163      | 0.00          | 0.99 | 0.00 |
| LUMO   | 2.105       | 0.00          | 0.99 | 0.00 |
| LUMO+1 | 2.156       | 0.00          | 1.00 | 0.00 |
| LUMO+2 | 3.296       | 0.00          | 0.99 | 0.01 |
| LUMO+3 | 3.912       | 0.02          | 0.96 | 0.02 |
| LUMO+4 | 4.144       | 0.20          | 0.07 | 0.73 |
| LUMO+5 | 4.322       | 0.04          | 0.07 | 0.90 |

  

|                                                                                     |                                                                                     |                                                                                      |                                                                                       |
|-------------------------------------------------------------------------------------|-------------------------------------------------------------------------------------|--------------------------------------------------------------------------------------|---------------------------------------------------------------------------------------|
| 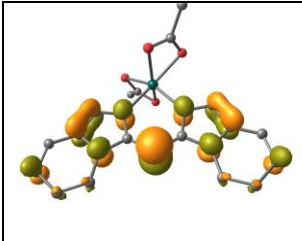 |  |  |  |
| HOMO                                                                                | HOMO-1                                                                              | HOMO-2                                                                               | HOMO-3                                                                                |
|  |  |  |  |
| LUMO                                                                                | LUMO+1                                                                              | LUMO+2                                                                               | LUMO+3                                                                                |

**Table S17** Composition and energies of selected molecular orbitals of {Zn<sup>II</sup>-L1•} (S=1/2)

| MO             | energy (eV) | % composition |      |      |
|----------------|-------------|---------------|------|------|
|                |             | Zn            | L1   | OAc  |
| $\alpha$ -spin |             |               |      |      |
| HOMO-5         | -6.438      | 0.01          | 0.04 | 0.95 |
| HOMO-4         | -6.413      | 0.00          | 0.04 | 0.96 |
| HOMO-3         | -6.135      | 0.04          | 0.05 | 0.91 |
| HOMO-2         | -5.923      | 0.03          | 0.02 | 0.95 |
| HOMO-1         | -5.909      | 0.00          | 0.99 | 0.01 |
| SOMO           | -4.494      | 0.00          | 0.99 | 0.01 |
| LUMO           | -1.583      | 0.00          | 0.99 | 0.01 |
| LUMO+1         | -1.536      | 0.00          | 1.00 | 0.00 |
| LUMO+2         | -0.577      | 0.00          | 0.99 | 0.01 |
| LUMO+3         | 0.094       | 0.01          | 0.99 | 0.00 |
| LUMO+4         | 1.116       | 0.00          | 1.00 | 0.00 |
| LUMO+5         | 1.343       | 0.01          | 0.99 | 0.00 |
| $\beta$ -spin  |             |               |      |      |
| HOMO-5         | -6.567      | 0.05          | 0.07 | 0.88 |
| HOMO-4         | -6.434      | 0.01          | 0.04 | 0.95 |
| HOMO-3         | -6.410      | 0.00          | 0.03 | 0.96 |
| HOMO-2         | -6.132      | 0.04          | 0.05 | 0.91 |
| HOMO-1         | -5.920      | 0.03          | 0.02 | 0.94 |
| HOMO           | -5.681      | 0.00          | 1.00 | 0.00 |
| LUMO           | -2.962      | 0.00          | 0.99 | 0.00 |
| LUMO+1         | -1.458      | 0.00          | 0.99 | 0.00 |
| LUMO+2         | -1.416      | 0.00          | 1.00 | 0.00 |
| LUMO+3         | -0.400      | 0.00          | 0.99 | 0.01 |
| LUMO+4         | 0.359       | 0.01          | 0.99 | 0.01 |
| LUMO+5         | 1.326       | 0.00          | 0.97 | 0.00 |

| $\alpha$ -spin                                                                      |                                                                                     |                                                                                      |                                                                                       |
|-------------------------------------------------------------------------------------|-------------------------------------------------------------------------------------|--------------------------------------------------------------------------------------|---------------------------------------------------------------------------------------|
| 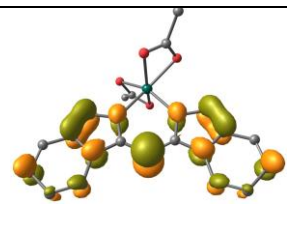   |    |    |    |
| SOMO                                                                                | HOMO-1                                                                              | HOMO-2                                                                               | HOMO-3                                                                                |
|    |    |    |    |
| LUMO                                                                                | LUMO+1                                                                              | LUMO+2                                                                               | LUMO+3                                                                                |
| $\beta$ -spin                                                                       |                                                                                     |                                                                                      |                                                                                       |
|   |   |   |   |
| HOMO                                                                                | HOMO-1                                                                              | HOMO-2                                                                               | HOMO-3                                                                                |
|  |  |  |  |
| LUMO                                                                                | LUMO+1                                                                              | LUMO+2                                                                               | LUMO+3                                                                                |

**Table S18** Composition and energies of selected molecular orbitals of **1b**,  $\{\text{Zn}^{\text{II}}(\mu\text{-}(\text{L1})_2)\text{Zn}^{\text{II}}\}$  ( $S=0$ )

| MO     | energy (eV) | % composition |      |      |
|--------|-------------|---------------|------|------|
|        |             | Zn            | L1   | OAc  |
| HOMO-5 | -6.435      | 0.04          | 0.03 | 0.93 |
| HOMO-4 | -6.435      | 0.04          | 0.04 | 0.92 |
| HOMO-3 | -5.958      | 0.00          | 1.00 | 0.00 |
| HOMO-2 | -5.866      | 0.00          | 0.99 | 0.00 |
| HOMO-1 | -5.714      | 0.00          | 0.99 | 0.01 |
| HOMO   | -5.510      | 0.00          | 1.00 | 0.00 |
| LUMO   | -1.453      | 0.01          | 0.98 | 0.02 |
| LUMO+1 | -1.383      | 0.00          | 0.99 | 0.01 |
| LUMO+2 | -1.243      | 0.00          | 0.99 | 0.01 |
| LUMO+3 | -1.207      | 0.00          | 0.99 | 0.01 |
| LUMO+4 | -0.985      | 0.00          | 0.99 | 0.01 |
| LUMO+5 | -0.409      | 0.00          | 0.99 | 0.01 |

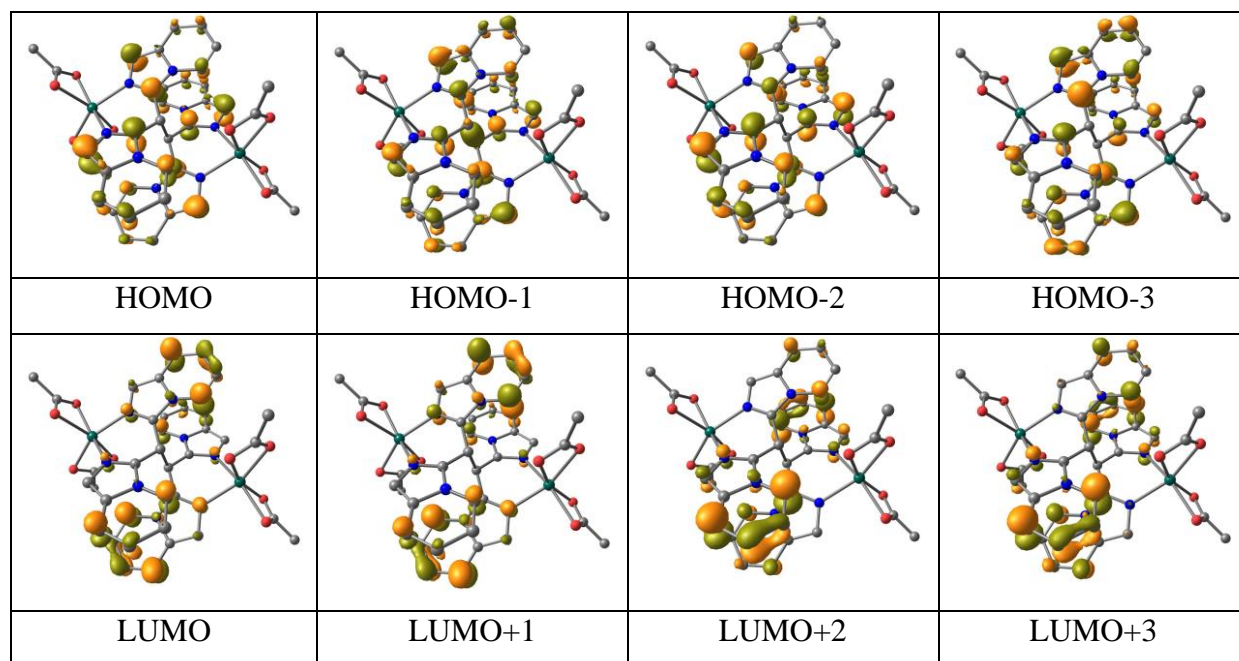

**Table S19** Composition and energies of selected molecular orbitals of {Cu<sup>II</sup>-L4<sup>-</sup>} (S=1/2)

| MO             | energy (eV) | % composition |      |      |
|----------------|-------------|---------------|------|------|
|                |             | Cu            | L4   | OAc  |
| $\alpha$ -spin |             |               |      |      |
| HOMO-5         | -3.189      | 0.05          | 0.88 | 0.07 |
| HOMO-4         | -3.099      | 0.10          | 0.41 | 0.49 |
| HOMO-3         | -2.971      | 0.03          | 0.06 | 0.91 |
| HOMO-2         | -2.411      | 0.21          | 0.37 | 0.42 |
| HOMO-1         | -2.237      | 0.20          | 0.24 | 0.56 |
| SOMO           | -1.128      | 0.04          | 0.91 | 0.05 |
| LUMO           | 1.775       | 0.01          | 0.98 | 0.01 |
| LUMO+1         | 2.412       | 0.01          | 0.97 | 0.02 |
| LUMO+2         | 2.622       | 0.00          | 0.99 | 0.01 |
| LUMO+3         | 2.781       | 0.01          | 0.98 | 0.01 |
| LUMO+4         | 3.800       | 0.70          | 0.10 | 0.20 |
| LUMO+5         | 3.867       | 0.56          | 0.10 | 0.34 |
| $\beta$ -spin  |             |               |      |      |
| HOMO-5         | -3.285      | 0.12          | 0.40 | 0.48 |
| HOMO-4         | -3.085      | 0.13          | 0.57 | 0.30 |
| HOMO-3         | -2.982      | 0.11          | 0.34 | 0.55 |
| HOMO-2         | -2.919      | 0.04          | 0.11 | 0.85 |
| HOMO-1         | -1.996      | 0.26          | 0.22 | 0.52 |
| HOMO           | -1.051      | 0.06          | 0.87 | 0.07 |
| LUMO           | 1.239       | 0.48          | 0.36 | 0.16 |
| LUMO+1         | 1.918       | 0.13          | 0.83 | 0.04 |
| LUMO+2         | 2.415       | 0.01          | 0.97 | 0.02 |
| LUMO+3         | 2.623       | 0.00          | 0.99 | 0.01 |
| LUMO+4         | 2.781       | 0.01          | 0.98 | 0.01 |
| LUMO+5         | 3.803       | 0.70          | 0.10 | 0.20 |

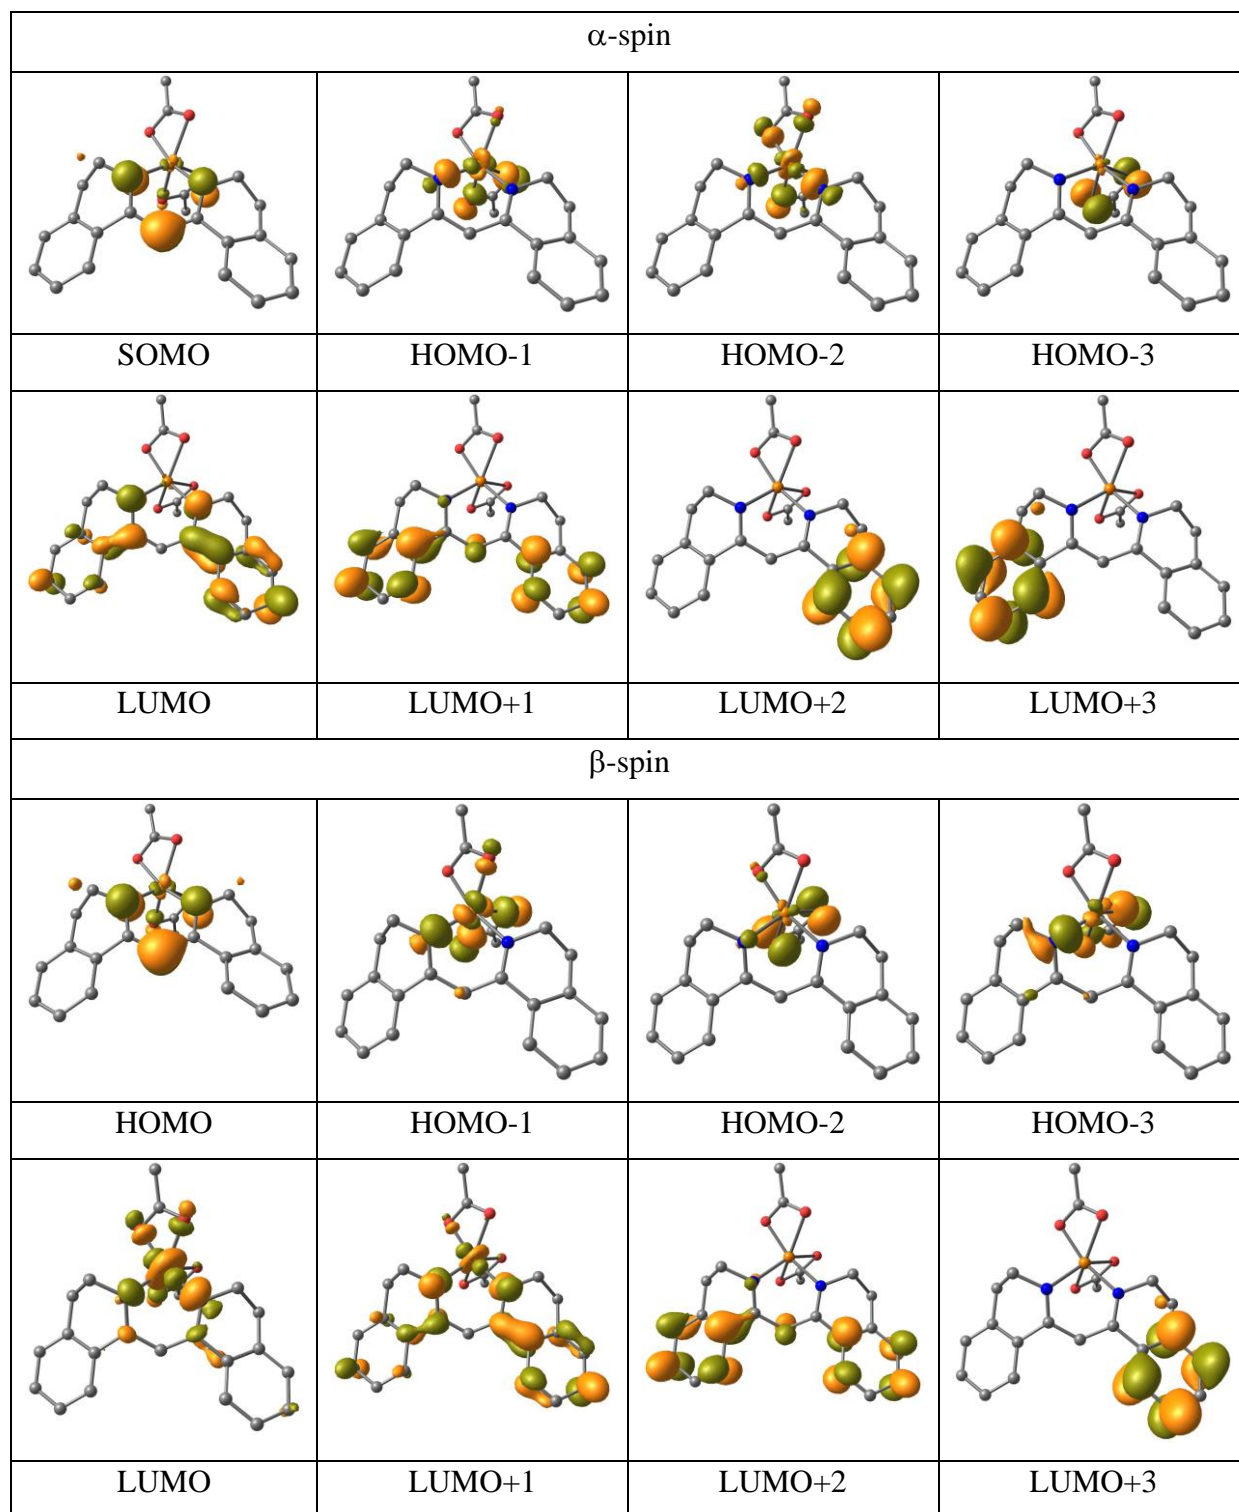



**Table S20** Composition and energies of selected molecular orbitals of {Cu<sup>II</sup>-L4<sup>•</sup>} (S=1)

| MO             | energy (eV) | % composition |      |      |
|----------------|-------------|---------------|------|------|
|                |             | Cu            | L4   | OAc  |
| $\alpha$ -spin |             |               |      |      |
| HOMO-5         | -6.932      | 0.06          | 0.78 | 0.16 |
| HOMO-4         | -6.796      | 0.02          | 0.92 | 0.06 |
| HOMO-3         | -6.648      | 0.03          | 0.12 | 0.85 |
| HOMO-2         | -6.312      | 0.12          | 0.52 | 0.37 |
| SOMO 2         | -6.209      | 0.14          | 0.37 | 0.49 |
| SOMO 1         | -5.907      | 0.14          | 0.09 | 0.76 |
| LUMO           | -2.043      | 0.01          | 0.98 | 0.01 |
| LUMO+1         | -1.007      | 0.00          | 0.97 | 0.03 |
| LUMO+2         | -0.472      | 0.00          | 0.98 | 0.02 |
| LUMO+3         | -0.300      | 0.00          | 0.97 | 0.03 |
| LUMO+4         | 0.595       | 0.03          | 0.95 | 0.02 |
| LUMO+5         | 0.924       | 0.33          | 0.12 | 0.55 |
| $\beta$ -spin  |             |               |      |      |
| HOMO-5         | -6.936      | 0.03          | 0.87 | 0.10 |
| HOMO-4         | -6.715      | 0.11          | 0.49 | 0.40 |
| HOMO-3         | -6.656      | 0.05          | 0.57 | 0.48 |
| HOMO-2         | -6.521      | 0.03          | 0.09 | 0.88 |
| HOMO-1         | -6.483      | 0.12          | 0.34 | 0.54 |
| HOMO           | -5.603      | 0.20          | 0.16 | 0.64 |
| LUMO           | -3.729      | 0.07          | 0.86 | 0.07 |
| LUMO+1         | -2.727      | 0.53          | 0.22 | 0.25 |
| LUMO+2         | -1.661      | 0.06          | 0.91 | 0.03 |
| LUMO+3         | -0.832      | 0.01          | 0.97 | 0.02 |
| LUMO+4         | -0.478      | 0.00          | 0.98 | 0.02 |
| LUMO+5         | -0.311      | 0.00          | 0.98 | 0.02 |

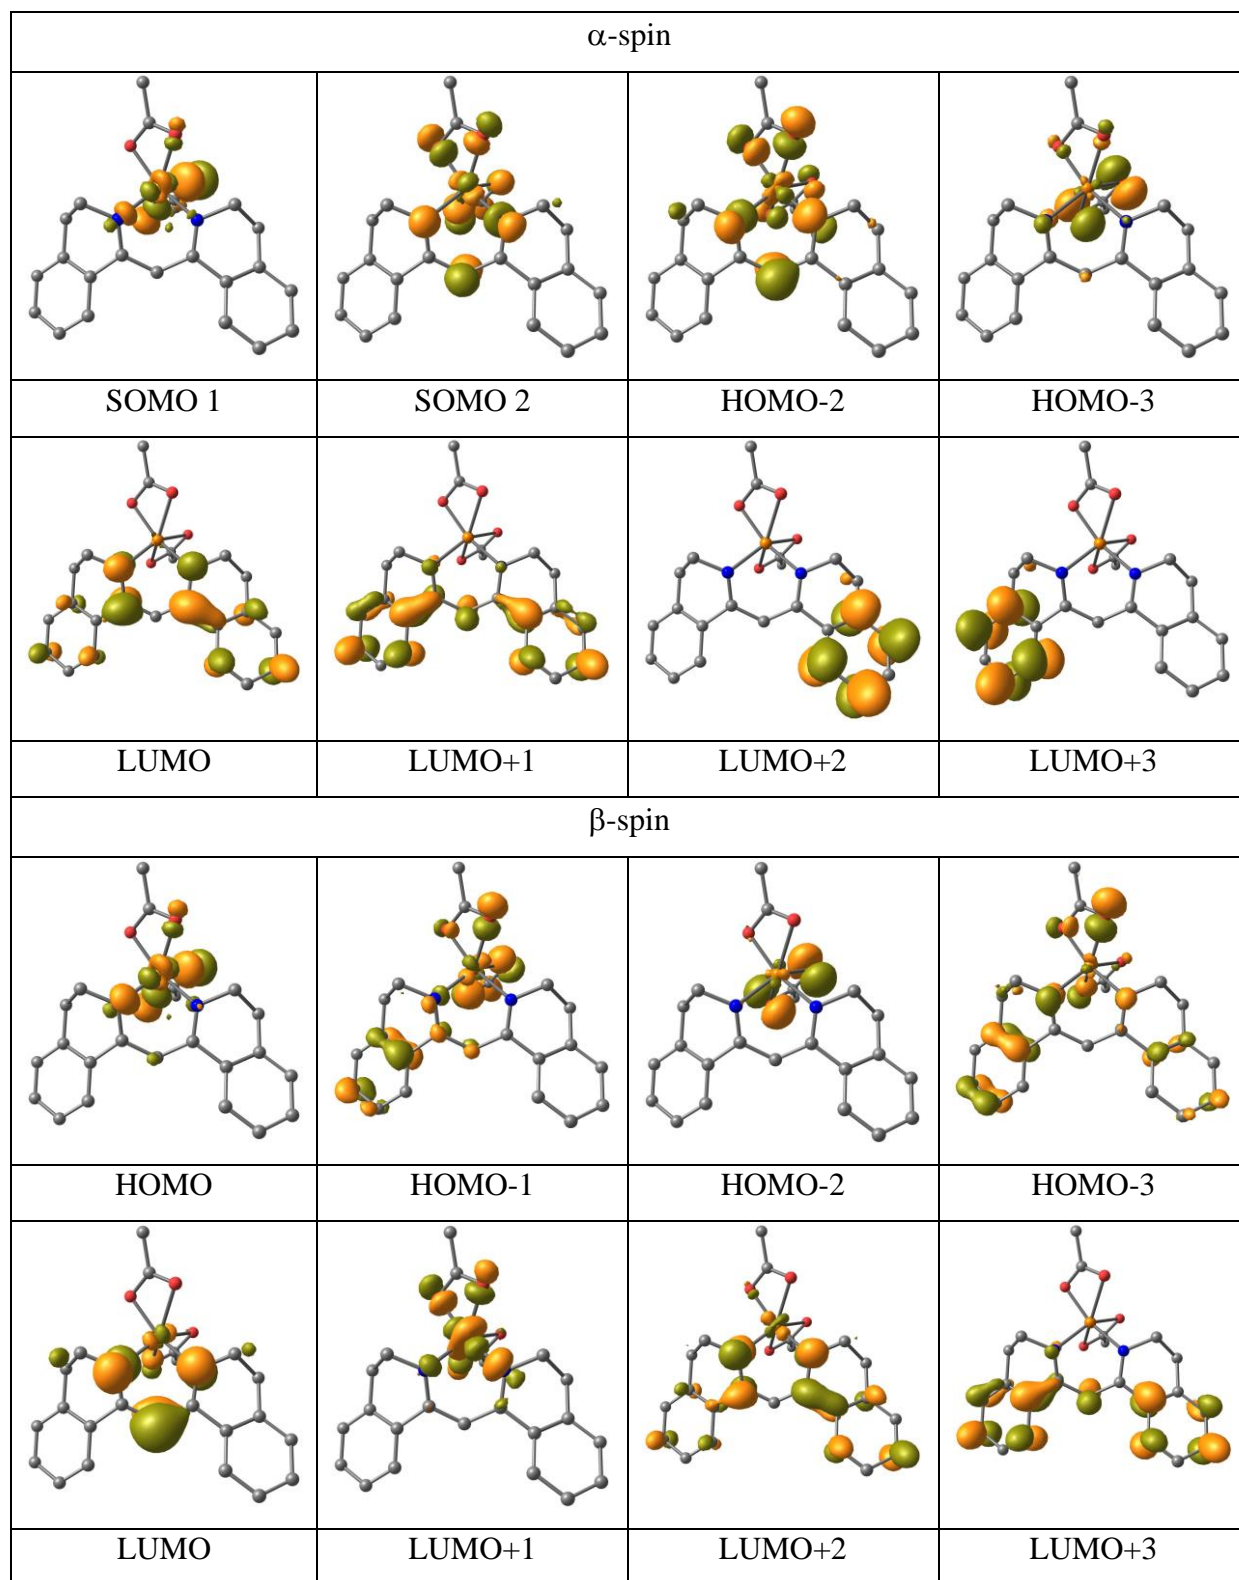

**Table S21** Composition and energies of selected molecular orbitals of **1c**, {Cu<sup>II</sup>(μ-(L4)<sub>2</sub>)Cu<sup>II</sup>} (S=1)

| MO     | energy (eV) | % composition |                   |      |
|--------|-------------|---------------|-------------------|------|
|        |             | Cu            | (L4) <sub>2</sub> | OAc  |
| α-spin |             |               |                   |      |
| HOMO-5 | -6.537      | 0.08          | 0.07              | 0.85 |
| HOMO-4 | -6.420      | 0.07          | 0.07              | 0.86 |
| HOMO-3 | -6.250      | 0.18          | 0.20              | 0.62 |
| HOMO-2 | -6.227      | 0.18          | 0.22              | 0.60 |
| SOMO 2 | -6.137      | 0.15          | 0.12              | 0.73 |
| SOMO 1 | -6.068      | 0.13          | 0.07              | 0.80 |
| LUMO   | -2.338      | 0.03          | 0.96              | 0.01 |
| LUMO+1 | -2.216      | 0.01          | 0.98              | 0.01 |
| LUMO+2 | -2.166      | 0.02          | 0.97              | 0.01 |
| LUMO+3 | -1.494      | 0.00          | 0.99              | 0.01 |
| LUMO+4 | -0.558      | 0.01          | 0.98              | 0.01 |
| LUMO+5 | -0.529      | 0.01          | 0.99              | 0.00 |
| β-spin |             |               |                   |      |
| HOMO-5 | -6.701      | 0.03          | 0.08              | 0.89 |
| HOMO-4 | -6.633      | 0.02          | 0.07              | 0.91 |
| HOMO-3 | -6.472      | 0.06          | 0.05              | 0.89 |
| HOMO-2 | -6.372      | 0.04          | 0.04              | 0.92 |
| HOMO-1 | -6.003      | 0.15          | 0.03              | 0.82 |
| HOMO   | -5.903      | 0.17          | 0.03              | 0.80 |
| LUMO   | -2.694      | 0.53          | 0.27              | 0.20 |
| LUMO+1 | -2.667      | 0.51          | 0.29              | 0.20 |
| LUMO+2 | -2.272      | 0.09          | 0.87              | 0.04 |
| LUMO+3 | -2.157      | 0.04          | 0.95              | 0.01 |
| LUMO+4 | -2.119      | 0.05          | 0.93              | 0.02 |
| LUMO+5 | -1.475      | 0.00          | 0.99              | 0.01 |

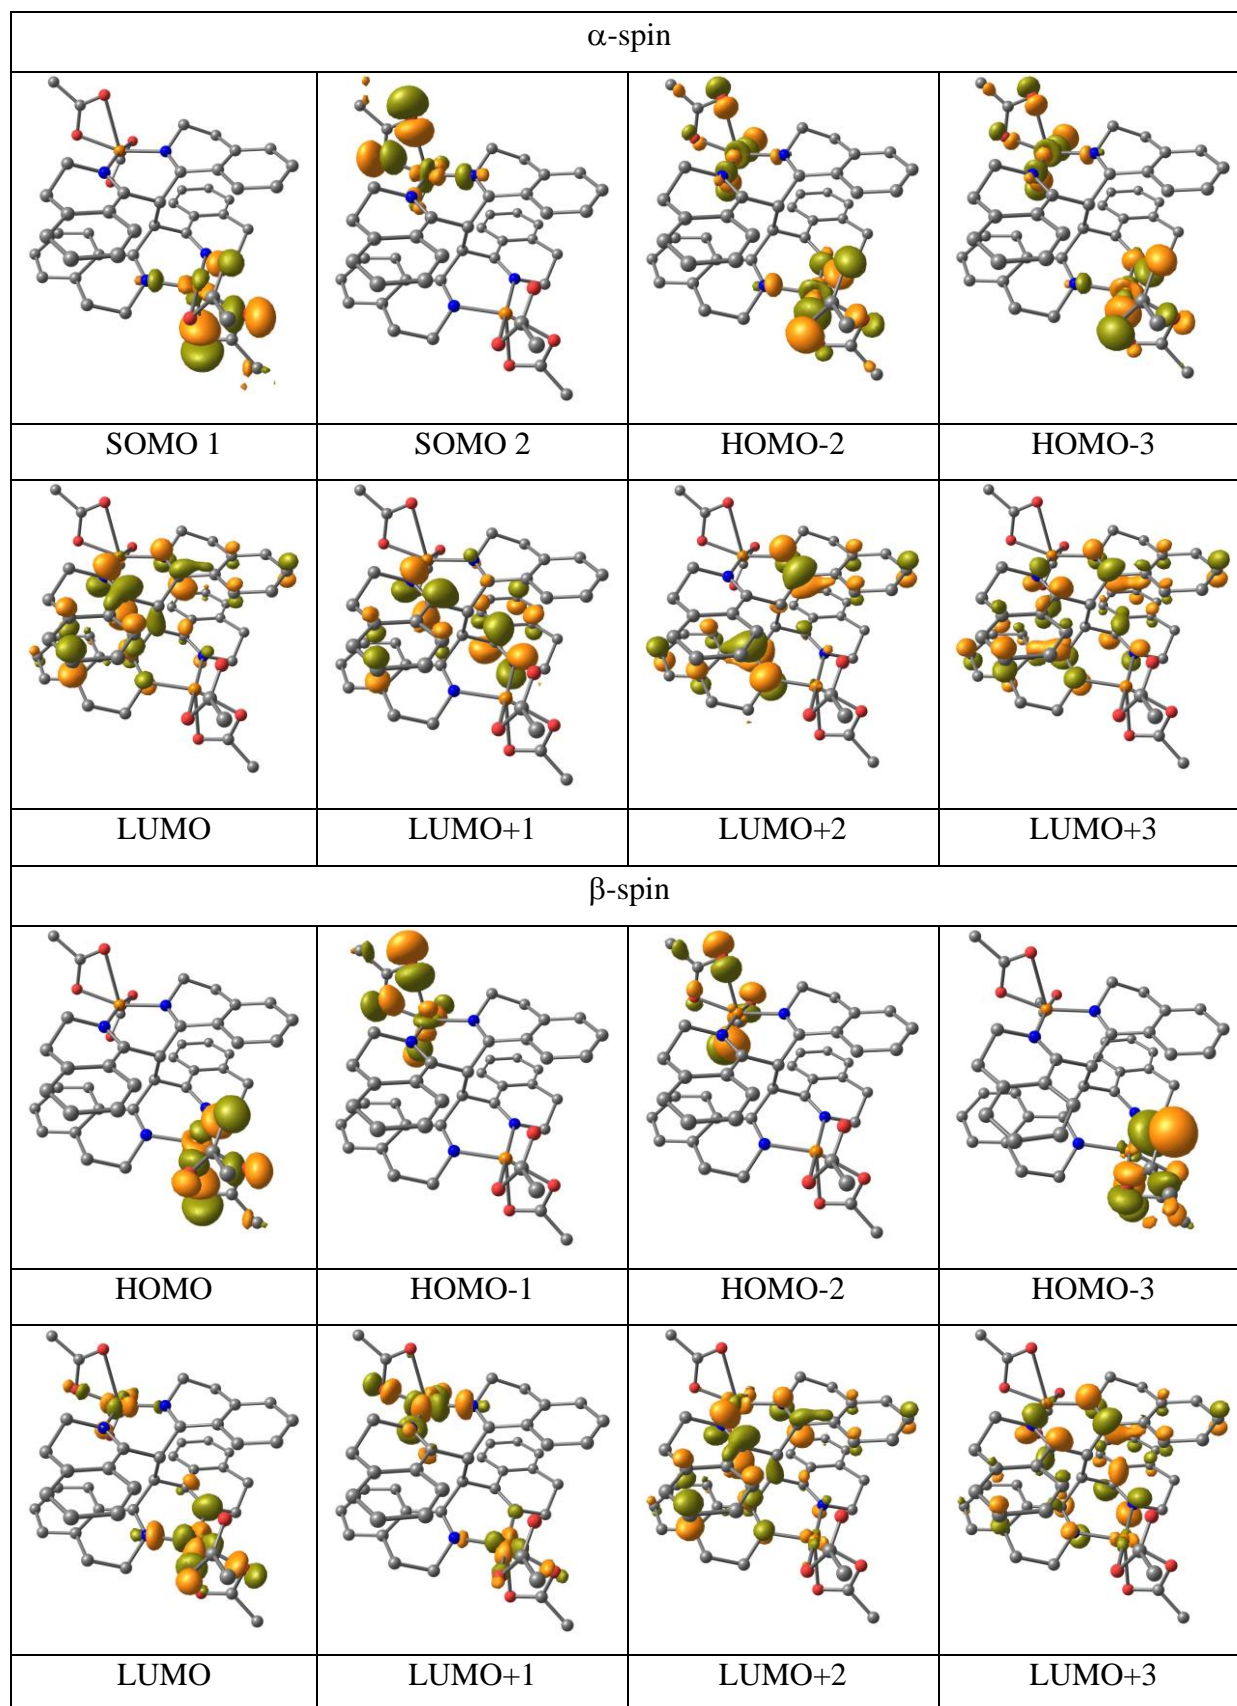

**Table S22** Composition and energies of selected molecular orbitals of  $\{Zn^{II}\text{-L2}^-\}$  ( $S=0$ )

| MO     | energy (eV) | % composition |      |      |
|--------|-------------|---------------|------|------|
|        |             | Zn            | L2   | OAc  |
| HOMO-5 | -2.282      | 0.04          | 0.04 | 0.92 |
| HOMO-4 | -2.174      | 0.03          | 0.05 | 0.92 |
| HOMO-3 | -1.844      | 0.00          | 0.97 | 0.03 |
| HOMO-2 | -1.740      | 0.02          | 0.03 | 0.95 |
| HOMO-1 | -1.431      | 0.01          | 0.02 | 0.97 |
| HOMO   | -0.193      | 0.00          | 0.99 | 0.01 |
| LUMO   | 1.153       | 0.00          | 0.99 | 0.01 |
| LUMO+1 | 1.222       | 0.00          | 1.00 | 0.00 |
| LUMO+2 | 1.524       | 0.00          | 1.00 | 0.00 |
| LUMO+3 | 1.718       | 0.00          | 1.00 | 0.00 |
| LUMO+4 | 2.663       | 0.00          | 1.00 | 0.00 |
| LUMO+5 | 3.040       | 0.00          | 0.99 | 0.01 |

  

|                                                                                     |                                                                                     |                                                                                      |                                                                                       |
|-------------------------------------------------------------------------------------|-------------------------------------------------------------------------------------|--------------------------------------------------------------------------------------|---------------------------------------------------------------------------------------|
| 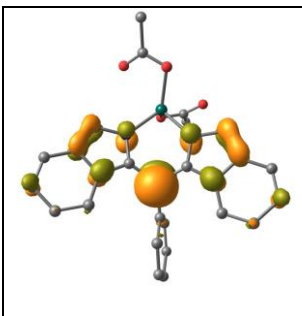 |  |  |  |
| HOMO                                                                                | HOMO-1                                                                              | HOMO-2                                                                               | HOMO-3                                                                                |
|  |  |  |  |
| LUMO                                                                                | LUMO+1                                                                              | LUMO+2                                                                               | LUMO+3                                                                                |

**Table S23** Composition and energies of selected molecular orbitals of {Zn<sup>II</sup>-L2<sup>•</sup>} (S=1/2)

| MO             | energy (eV) | % composition |      |      |
|----------------|-------------|---------------|------|------|
|                |             | Zn            | L2   | OAc  |
| $\alpha$ -spin |             |               |      |      |
| HOMO-5         | -5.481      | 0.01          | 0.04 | 0.95 |
| HOMO-4         | -5.452      | 0.00          | 0.03 | 0.97 |
| HOMO-3         | -5.437      | 0.04          | 0.03 | 0.93 |
| HOMO-2         | -4.991      | 0.04          | 0.04 | 0.92 |
| HOMO-1         | -4.806      | 0.03          | 0.02 | 0.95 |
| SOMO           | -4.283      | 0.00          | 0.99 | 0.01 |
| LUMO           | -2.219      | 0.00          | 1.00 | 0.00 |
| LUMO+1         | -2.184      | 0.00          | 0.99 | 0.01 |
| LUMO+2         | -1.602      | 0.00          | 1.00 | 0.00 |
| LUMO+3         | -1.403      | 0.00          | 0.99 | 0.01 |
| LUMO+4         | -1.268      | 0.00          | 0.99 | 0.01 |
| LUMO+5         | -0.389      | 0.00          | 0.99 | 0.01 |
| $\beta$ -spin  |             |               |      |      |
| HOMO-5         | -5.479      | 0.01          | 0.03 | 0.96 |
| HOMO-4         | -5.451      | 0.00          | 0.03 | 0.97 |
| HOMO-3         | -5.432      | 0.04          | 0.04 | 0.92 |
| HOMO-2         | -5.409      | 0.00          | 0.98 | 0.02 |
| HOMO-1         | -4.986      | 0.04          | 0.04 | 0.92 |
| HOMO           | -4.802      | 0.03          | 0.02 | 0.95 |
| LUMO           | -3.730      | 0.00          | 0.99 | 0.01 |
| LUMO+1         | -2.129      | 0.00          | 1.00 | 0.00 |
| LUMO+2         | -2.088      | 0.00          | 0.99 | 0.01 |
| LUMO+3         | -1.486      | 0.00          | 1.00 | 0.00 |
| LUMO+4         | -1.299      | 0.00          | 0.99 | 0.01 |
| LUMO+5         | -1.189      | 0.01          | 0.99 | 0.00 |

| $\alpha$ -spin                                                                      |                                                                                     |                                                                                      |                                                                                       |
|-------------------------------------------------------------------------------------|-------------------------------------------------------------------------------------|--------------------------------------------------------------------------------------|---------------------------------------------------------------------------------------|
| 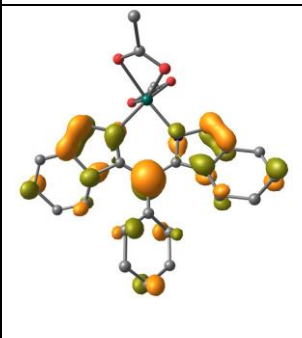   |    |    |    |
| SOMO                                                                                | HOMO-1                                                                              | HOMO-2                                                                               | HOMO-3                                                                                |
|    |    |    |    |
| LUMO                                                                                | LUMO+1                                                                              | LUMO+2                                                                               | LUMO+3                                                                                |
| $\beta$ -spin                                                                       |                                                                                     |                                                                                      |                                                                                       |
|  |  |  |  |
| HOMO                                                                                | HOMO-1                                                                              | HOMO-2                                                                               | HOMO-3                                                                                |
|  |  |  |  |
| LUMO                                                                                | LUMO+1                                                                              | LUMO+2                                                                               | LUMO+3                                                                                |

**Table S24** Composition and energies of selected molecular orbitals of  $\mathbf{3}^-$ ,  $\{\text{Ru}^{\text{II}}\text{-L3}^-\}$  ( $S=0$ )

| MO     | energy (eV) | % composition |      |      |
|--------|-------------|---------------|------|------|
|        |             | Ru            | L3   | acac |
| HOMO-5 | -2.547      | 0.04          | 0.04 | 0.92 |
| HOMO-4 | -2.014      | 0.00          | 1.00 | 0.00 |
| HOMO-3 | -1.195      | 0.78          | 0.08 | 0.14 |
| HOMO-2 | -1.078      | 0.62          | 0.22 | 0.16 |
| HOMO-1 | -0.765      | 0.73          | 0.08 | 0.19 |
| HOMO   | 0.019       | 0.16          | 0.80 | 0.04 |
| LUMO   | 2.205       | 0.02          | 0.95 | 0.03 |
| LUMO+1 | 2.255       | 0.01          | 0.97 | 0.02 |
| LUMO+2 | 2.625       | 0.04          | 0.05 | 0.91 |
| LUMO+3 | 2.721       | 0.06          | 0.06 | 0.88 |
| LUMO+4 | 3.349       | 0.01          | 0.98 | 0.01 |
| LUMO+5 | 3.882       | 0.47          | 0.31 | 0.22 |

  

|                                                                                     |                                                                                     |                                                                                      |                                                                                       |
|-------------------------------------------------------------------------------------|-------------------------------------------------------------------------------------|--------------------------------------------------------------------------------------|---------------------------------------------------------------------------------------|
| 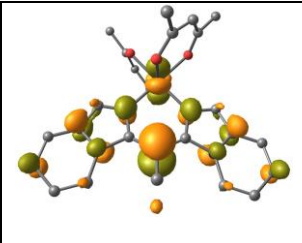 |  |  |  |
| HOMO                                                                                | HOMO-1                                                                              | HOMO-2                                                                               | HOMO-3                                                                                |
|  |  |  |  |
| LUMO                                                                                | LUMO+1                                                                              | LUMO+2                                                                               | LUMO+3                                                                                |



**Table S25** Composition and energies of selected molecular orbitals of **3**, {Ru<sup>II</sup>-L3<sup>•</sup>} (*S*=1/2)

| MO             | energy (eV) | % composition |      |      |
|----------------|-------------|---------------|------|------|
|                |             | Ru            | L3   | acac |
| $\alpha$ -spin |             |               |      |      |
| HOMO-5         | -5.432      | 0.13          | 0.05 | 0.82 |
| HOMO-4         | -5.360      | 0.00          | 1.00 | 0.00 |
| HOMO-3         | -4.665      | 0.76          | 0.08 | 0.16 |
| HOMO-2         | -4.632      | 0.56          | 0.18 | 0.26 |
| HOMO-1         | -4.109      | 0.64          | 0.06 | 0.30 |
| SOMO           | -3.584      | 0.14          | 0.83 | 0.03 |
| LUMO           | -1.082      | 0.01          | 0.98 | 0.01 |
| LUMO+1         | -1.037      | 0.01          | 0.98 | 0.01 |
| LUMO+2         | -0.189      | 0.03          | 0.04 | 0.93 |
| LUMO+3         | -0.133      | 0.01          | 0.94 | 0.05 |
| LUMO+4         | -0.102      | 0.05          | 0.11 | 0.84 |
| LUMO+5         | 0.685       | 0.06          | 0.93 | 0.01 |
| $\beta$ -spin  |             |               |      |      |
| HOMO-5         | -5.711      | 0.27          | 0.06 | 0.68 |
| HOMO-4         | -5.380      | 0.05          | 0.04 | 0.91 |
| HOMO-3         | -5.240      | 0.00          | 1.00 | 0.00 |
| HOMO-2         | -4.555      | 0.76          | 0.08 | 0.16 |
| HOMO-1         | -4.015      | 0.65          | 0.07 | 0.28 |
| HOMO           | -4.005      | 0.54          | 0.30 | 0.16 |
| LUMO           | -2.171      | 0.21          | 0.74 | 0.05 |
| LUMO+1         | -0.992      | 0.02          | 0.98 | 0.00 |
| LUMO+2         | -0.932      | 0.03          | 0.96 | 0.01 |
| LUMO+3         | -0.162      | 0.04          | 0.05 | 0.91 |
| LUMO+4         | -0.091      | 0.05          | 0.07 | 0.88 |
| LUMO+5         | 0.042       | 0.02          | 0.98 | 0.00 |

| $\alpha$ -spin                                                                      |                                                                                     |                                                                                      |                                                                                       |
|-------------------------------------------------------------------------------------|-------------------------------------------------------------------------------------|--------------------------------------------------------------------------------------|---------------------------------------------------------------------------------------|
| 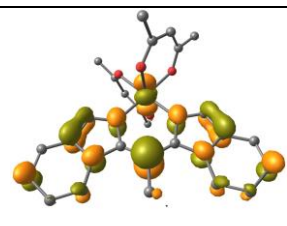   |    |    |    |
| SOMO                                                                                | HOMO-1                                                                              | HOMO-2                                                                               | HOMO-3                                                                                |
|    |    |    |    |
| LUMO                                                                                | LUMO+1                                                                              | LUMO+2                                                                               | LUMO+3                                                                                |
| $\beta$ -spin                                                                       |                                                                                     |                                                                                      |                                                                                       |
|   |   |   |   |
| HOMO                                                                                | HOMO-1                                                                              | HOMO-2                                                                               | HOMO-3                                                                                |
|  |  |  |  |
| LUMO                                                                                | LUMO+1                                                                              | LUMO+2                                                                               | LUMO+3                                                                                |

**Table S26** Composition and energies of selected molecular orbitals of  $\mathbf{3}^+$ , {Ru<sup>III</sup>-L3\*} ( $S=1$ )

| MO             | energy (eV) | % composition |      |      |
|----------------|-------------|---------------|------|------|
|                |             | Ru            | L3   | acac |
| $\alpha$ -spin |             |               |      |      |
| HOMO-5         | -9.254      | 0.73          | 0.09 | 0.18 |
| HOMO-4         | -9.099      | 0.42          | 0.15 | 0.43 |
| HOMO-3         | -8.587      | 0.30          | 0.11 | 0.59 |
| HOMO-2         | -8.544      | 0.03          | 0.90 | 0.07 |
| SOMO 2         | -8.516      | 0.19          | 0.06 | 0.75 |
| SOMO 1         | -7.168      | 0.05          | 0.94 | 0.01 |
| LUMO           | -4.016      | 0.01          | 0.98 | 0.01 |
| LUMO+1         | -3.989      | 0.01          | 0.99 | 0.00 |
| LUMO+2         | -3.605      | 0.20          | 0.06 | 0.74 |
| LUMO+3         | -3.569      | 0.10          | 0.06 | 0.84 |
| LUMO+4         | -3.408      | 0.39          | 0.07 | 0.54 |
| LUMO+5         | -3.225      | 0.08          | 0.88 | 0.04 |
| $\beta$ -spin  |             |               |      |      |
| HOMO-5         | -9.605      | 0.07          | 0.87 | 0.06 |
| HOMO-4         | -9.197      | 0.59          | 0.07 | 0.35 |
| HOMO-3         | -8.804      | 0.26          | 0.10 | 0.63 |
| HOMO-2         | -8.639      | 0.44          | 0.07 | 0.49 |
| HOMO-1         | -8.351      | 0.02          | 0.96 | 0.02 |
| HOMO           | -8.283      | 0.48          | 0.12 | 0.41 |
| LUMO           | -6.091      | 0.70          | 0.09 | 0.21 |
| LUMO+1         | -5.603      | 0.06          | 0.93 | 0.01 |
| LUMO+2         | -3.886      | 0.02          | 0.97 | 0.01 |
| LUMO+3         | -3.837      | 0.02          | 0.97 | 0.01 |
| LUMO+4         | -3.549      | 0.04          | 0.04 | 0.92 |
| LUMO+5         | -3.511      | 0.07          | 0.06 | 0.87 |

| $\alpha$ -spin                                                                      |                                                                                     |                                                                                      |                                                                                       |
|-------------------------------------------------------------------------------------|-------------------------------------------------------------------------------------|--------------------------------------------------------------------------------------|---------------------------------------------------------------------------------------|
| 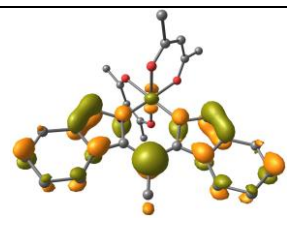   |    |    |    |
| SOMO 1                                                                              | SOMO 2                                                                              | HOMO-2                                                                               | HOMO-3                                                                                |
|    |    |    |    |
| LUMO                                                                                | LUMO+1                                                                              | LUMO+2                                                                               | LUMO+3                                                                                |
| $\beta$ -spin                                                                       |                                                                                     |                                                                                      |                                                                                       |
|   |   |   |   |
| HOMO                                                                                | HOMO-1                                                                              | HOMO-2                                                                               | HOMO-3                                                                                |
|  |  |  |  |
| LUMO                                                                                | LUMO+1                                                                              | LUMO+2                                                                               | LUMO+3                                                                                |

**Table S27** Composition and energies of selected molecular orbitals of [3-H]<sup>+</sup>, {Ru<sup>III</sup>-HL3}

(S=1/2)

| MO             | energy (eV) | % composition |      |      |
|----------------|-------------|---------------|------|------|
|                |             | Ru            | HL3  | acac |
| $\alpha$ -spin |             |               |      |      |
| HOMO-5         | -9.073      | 0.10          | 0.04 | 0.86 |
| HOMO-4         | -8.858      | 0.72          | 0.08 | 0.20 |
| HOMO-3         | -8.504      | 0.59          | 0.21 | 0.20 |
| HOMO-2         | -8.406      | 0.14          | 0.82 | 0.04 |
| HOMO-1         | -8.311      | 0.06          | 0.86 | 0.08 |
| SOMO           | -8.227      | 0.31          | 0.11 | 0.58 |
| LUMO           | -3.849      | 0.01          | 0.96 | 0.03 |
| LUMO+1         | -3.768      | 0.01          | 0.97 | 0.02 |
| LUMO+2         | -3.673      | 0.08          | 0.05 | 0.87 |
| LUMO+3         | -3.585      | 0.04          | 0.07 | 0.89 |
| LUMO+4         | -2.950      | 0.04          | 0.95 | 0.01 |
| LUMO+5         | -2.630      | 0.08          | 0.88 | 0.04 |
| $\beta$ -spin  |             |               |      |      |
| HOMO-5         | -9.159      | 0.31          | 0.06 | 0.64 |
| HOMO-4         | -8.843      | 0.03          | 0.04 | 0.93 |
| HOMO-3         | -8.490      | 0.68          | 0.08 | 0.24 |
| HOMO-2         | -8.421      | 0.02          | 0.96 | 0.01 |
| HOMO-1         | -8.299      | 0.05          | 0.93 | 0.02 |
| HOMO           | -8.168      | 0.66          | 0.16 | 0.18 |
| LUMO           | -5.576      | 0.64          | 0.07 | 0.28 |
| LUMO+1         | -3.844      | 0.01          | 0.94 | 0.05 |
| LUMO+2         | -3.734      | 0.02          | 0.97 | 0.01 |
| LUMO+3         | -3.623      | 0.07          | 0.04 | 0.89 |
| LUMO+4         | -3.554      | 0.05          | 0.08 | 0.87 |
| LUMO+5         | -2.934      | 0.03          | 0.95 | 0.02 |

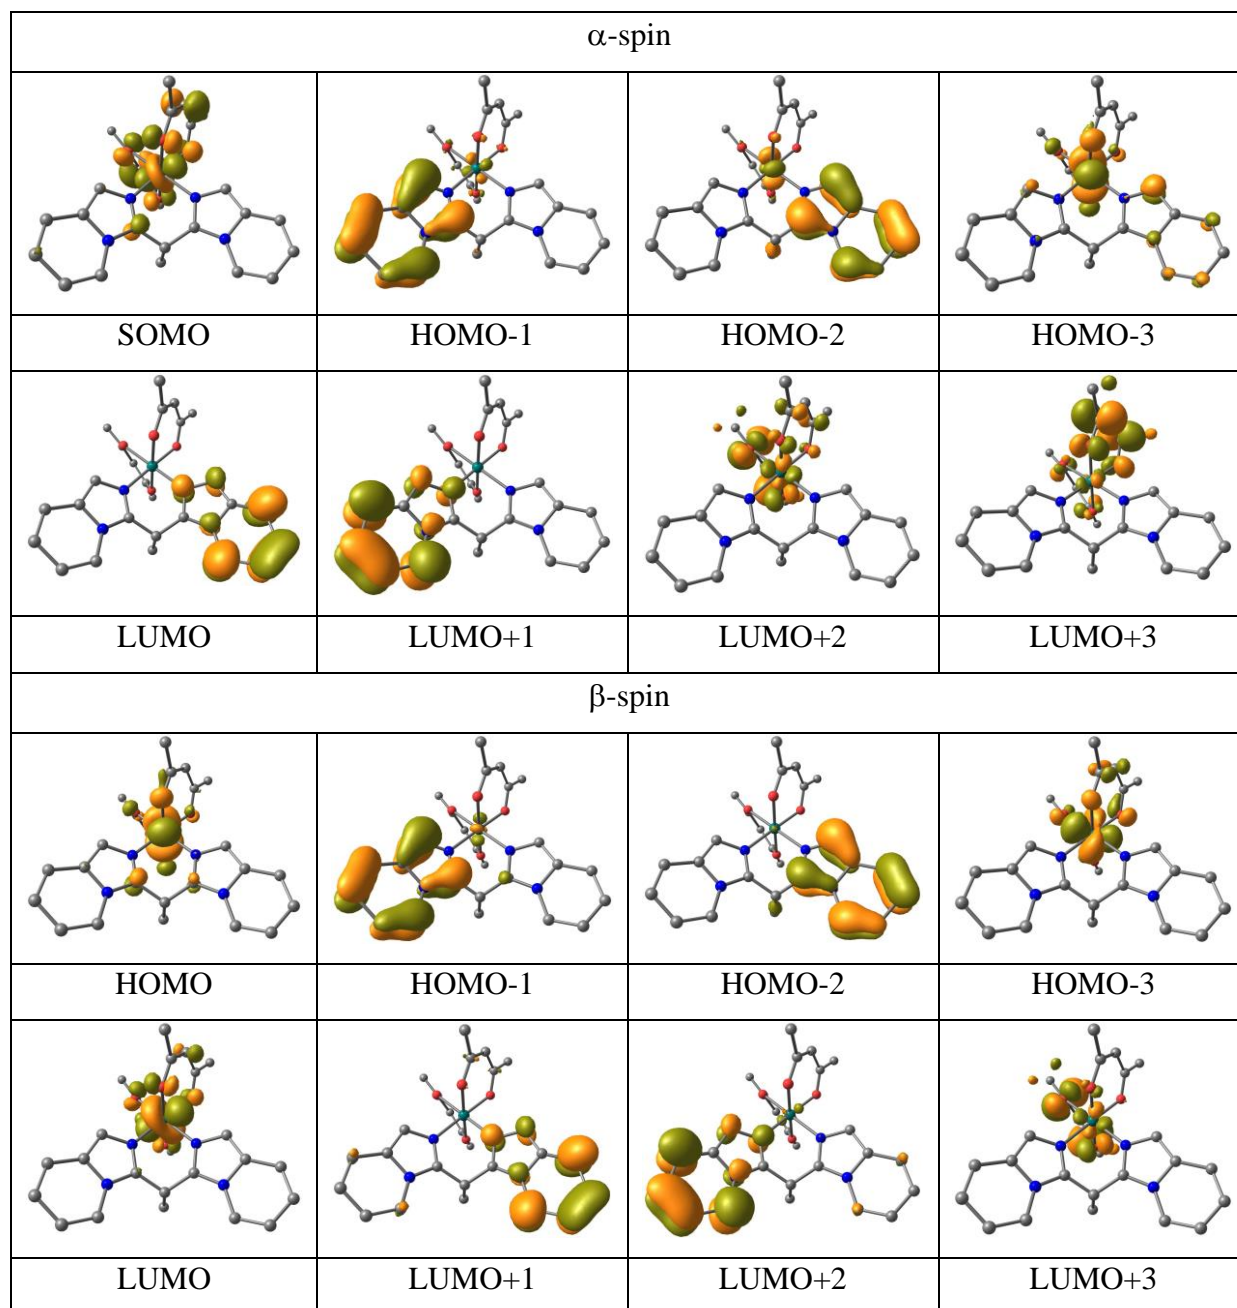

*A. Optimized cartesian coordinates using (U)B3LYP density functional (coordinates for the stable electronic states are only given).*

-----  
 {Cu<sup>II</sup>-L1<sup>-</sup>} for **1a** (S=1/2)  
 -----

|   |              |              |              |
|---|--------------|--------------|--------------|
| O | 3.533218000  | 11.724164000 | 8.158772000  |
| O | 2.749348000  | 12.531886000 | 6.212988000  |
| N | 2.461383000  | 7.995143000  | 4.278515000  |
| N | -0.872027000 | 7.866417000  | 7.934593000  |
| O | -0.608544000 | 12.797867000 | 5.579849000  |
| N | 0.128565000  | 9.795212000  | 7.502806000  |
| N | 2.055950000  | 9.869950000  | 5.386934000  |
| C | -1.311358000 | 6.558209000  | 7.949627000  |
| H | -0.867618000 | 5.893181000  | 7.219771000  |
| C | 1.715509000  | 8.558377000  | 5.305464000  |
| O | 0.276509000  | 12.659583000 | 7.641502000  |
| C | 3.292905000  | 9.015746000  | 3.717061000  |
| C | 3.597850000  | 12.491271000 | 7.187167000  |
| C | 4.146280000  | 8.658502000  | 2.640768000  |
| H | 4.777180000  | 9.429868000  | 2.208976000  |
| C | -1.394205000 | 8.836393000  | 8.848235000  |
| C | 0.785601000  | 7.862121000  | 6.095925000  |
| H | 0.623256000  | 6.809431000  | 5.910785000  |
| C | 0.061654000  | 8.494299000  | 7.120869000  |
| C | -2.251099000 | 6.165203000  | 8.849110000  |
| H | -2.583184000 | 5.132512000  | 8.846538000  |
| C | 3.003939000  | 10.148885000 | 4.438341000  |
| H | 3.403800000  | 11.147270000 | 4.354824000  |
| C | 2.490524000  | 6.701873000  | 3.797692000  |
| H | 1.830946000  | 5.993381000  | 4.282285000  |
| C | -0.744931000 | 10.006458000 | 8.536591000  |
| H | -0.837218000 | 10.989850000 | 8.970201000  |
| C | 3.315296000  | 6.376028000  | 2.768048000  |
| H | 3.323440000  | 5.354617000  | 2.402826000  |
| C | 4.167121000  | 7.374769000  | 2.168579000  |
| H | 4.819805000  | 7.098887000  | 1.346323000  |
| C | -2.798978000 | 7.108157000  | 9.794146000  |
| H | -3.547990000 | 6.778423000  | 10.507218000 |
| C | -2.372427000 | 8.407881000  | 9.782986000  |
| H | -2.768926000 | 9.138882000  | 10.481502000 |
| C | 4.745786000  | 13.498872000 | 7.068771000  |
| H | 4.343088000  | 14.517224000 | 7.083086000  |
| H | 5.263425000  | 13.370651000 | 6.112249000  |
| H | 5.452220000  | 13.372626000 | 7.891818000  |
| C | -0.498688000 | 13.186718000 | 6.751815000  |
| C | -1.315442000 | 14.382329000 | 7.252514000  |
| H | -1.978999000 | 14.748415000 | 6.466380000  |
| H | -0.638730000 | 15.184272000 | 7.565980000  |

|    |              |              |             |
|----|--------------|--------------|-------------|
| H  | -1.903736000 | 14.095717000 | 8.130707000 |
| Cu | 1.308713000  | 11.245469000 | 6.691866000 |

-----  
 {Cu<sup>II</sup>-L1\*} for **1a** (S=1)  
 -----

|   |              |              |              |
|---|--------------|--------------|--------------|
| O | 3.370821000  | 11.514934000 | 8.142975000  |
| O | 2.810046000  | 12.575739000 | 6.260318000  |
| N | 2.429115000  | 8.056901000  | 4.248014000  |
| N | -0.824333000 | 7.900987000  | 7.985921000  |
| O | -0.515627000 | 12.563188000 | 5.513724000  |
| N | 0.119606000  | 9.856526000  | 7.506684000  |
| N | 2.076471000  | 9.925427000  | 5.401034000  |
| C | -1.222234000 | 6.581747000  | 8.035348000  |
| H | -0.777524000 | 5.908584000  | 7.314751000  |
| C | 1.719069000  | 8.622406000  | 5.302617000  |
| O | 0.227680000  | 12.733647000 | 7.611818000  |
| C | 3.243539000  | 9.064047000  | 3.692124000  |
| C | 3.595992000  | 12.373276000 | 7.272046000  |
| C | 4.071609000  | 8.741848000  | 2.594707000  |
| H | 4.696457000  | 9.520065000  | 2.170416000  |
| C | -1.339565000 | 8.857413000  | 8.883962000  |
| C | 0.798026000  | 7.933958000  | 6.111256000  |
| H | 0.636665000  | 6.880185000  | 5.926645000  |
| C | 0.076157000  | 8.551011000  | 7.147672000  |
| C | -2.135131000 | 6.190424000  | 8.968400000  |
| H | -2.440070000 | 5.150764000  | 8.997655000  |
| C | 2.984441000  | 10.207507000 | 4.448481000  |
| H | 3.400494000  | 11.200689000 | 4.367168000  |
| C | 2.424037000  | 6.775339000  | 3.739332000  |
| H | 1.767229000  | 6.061012000  | 4.217336000  |
| C | -0.717942000 | 10.058441000 | 8.540559000  |
| H | -0.831760000 | 11.044242000 | 8.966395000  |
| C | 3.225278000  | 6.470294000  | 2.680072000  |
| H | 3.212513000  | 5.459573000  | 2.288904000  |
| C | 4.067281000  | 7.464810000  | 2.091936000  |
| H | 4.697373000  | 7.203172000  | 1.249197000  |
| C | -2.681171000 | 7.132556000  | 9.894776000  |
| H | -3.405809000 | 6.802073000  | 10.630548000 |
| C | -2.284874000 | 8.445748000  | 9.848713000  |
| H | -2.678080000 | 9.184995000  | 10.537906000 |
| C | 4.821255000  | 13.272214000 | 7.345747000  |
| H | 4.503357000  | 14.291500000 | 7.588565000  |
| H | 5.326061000  | 13.313198000 | 6.376220000  |
| H | 5.508280000  | 12.916671000 | 8.115044000  |
| C | -0.528299000 | 13.113375000 | 6.628815000  |
| C | -1.434726000 | 14.301471000 | 6.914301000  |
| H | -2.152800000 | 14.435735000 | 6.104007000  |
| H | -0.822453000 | 15.204431000 | 7.007757000  |
| H | -1.957524000 | 14.165519000 | 7.865471000  |



Cu 1.320281000 11.345348000 6.707664000

-----  
**1a, {Cu<sup>II</sup>-( $\mu$ -(L1)<sub>2</sub>)-Cu<sup>II</sup>} (S=1)**  
-----

|   |              |              |              |
|---|--------------|--------------|--------------|
| O | 3.317755000  | 11.321927000 | 8.079984000  |
| O | 2.602093000  | 12.670604000 | 6.441311000  |
| N | 2.140088000  | 8.100995000  | 4.173811000  |
| N | -0.637801000 | 7.802606000  | 7.978756000  |
| O | -0.437433000 | 12.710932000 | 5.284489000  |
| N | 0.020430000  | 9.827838000  | 7.416900000  |
| N | 1.852931000  | 10.016774000 | 5.229751000  |
| C | -0.768477000 | 6.435584000  | 8.172594000  |
| H | 0.017059000  | 5.811739000  | 7.776193000  |
| C | 1.823300000  | 8.690353000  | 5.369665000  |
| O | -0.061491000 | 12.723257000 | 7.475780000  |
| C | 2.375050000  | 9.136935000  | 3.241153000  |
| C | 3.411419000  | 12.366087000 | 7.380985000  |
| C | 2.716009000  | 8.788564000  | 1.908075000  |
| H | 2.894450000  | 9.585335000  | 1.194269000  |
| C | -1.591812000 | 8.711496000  | 8.487913000  |
| C | 1.552651000  | 7.968061000  | 6.656944000  |
| H | 1.380143000  | 6.909804000  | 6.443054000  |
| C | 0.327208000  | 8.531640000  | 7.329885000  |
| C | -1.846719000 | 5.961017000  | 8.851385000  |
| H | -1.925195000 | 4.888885000  | 8.989679000  |
| C | 2.185411000  | 10.316564000 | 3.944296000  |
| H | 2.247767000  | 11.337134000 | 3.600184000  |
| C | 2.231493000  | 6.760662000  | 3.816976000  |
| H | 2.029003000  | 6.024093000  | 4.588842000  |
| C | -1.137873000 | 9.966595000  | 8.116128000  |
| H | -1.553694000 | 10.942729000 | 8.307373000  |
| C | 2.557857000  | 6.450493000  | 2.533127000  |
| H | 2.626108000  | 5.403718000  | 2.259683000  |
| C | 2.807181000  | 7.469794000  | 1.558892000  |
| H | 3.065765000  | 7.187257000  | 0.544012000  |
| C | -2.839883000 | 6.849797000  | 9.373542000  |
| H | -3.690404000 | 6.445325000  | 9.911726000  |
| C | -2.710627000 | 8.199928000  | 9.196696000  |
| H | -3.442056000 | 8.901721000  | 9.582438000  |
| C | 4.531185000  | 13.360739000 | 7.651954000  |
| H | 4.124012000  | 14.196227000 | 8.231745000  |
| H | 4.916538000  | 13.771499000 | 6.715663000  |
| H | 5.333006000  | 12.896572000 | 8.229525000  |
| C | -0.631457000 | 13.201758000 | 6.413575000  |
| C | -1.529626000 | 14.407736000 | 6.614852000  |
| H | -2.140660000 | 14.578055000 | 5.727352000  |
| H | -0.905354000 | 15.289540000 | 6.794183000  |
| H | -2.164516000 | 14.272444000 | 7.494572000  |
| N | 2.398432000  | 7.964827000  | 10.122715000 |

|    |              |              |              |
|----|--------------|--------------|--------------|
| N  | 5.157176000  | 8.139030000  | 6.507221000  |
| N  | 4.204544000  | 6.149078000  | 6.684889000  |
| N  | 2.393558000  | 6.027611000  | 9.062703000  |
| C  | 5.484659000  | 9.483591000  | 6.590274000  |
| H  | 4.772908000  | 10.131238000 | 7.090863000  |
| C  | 2.557643000  | 7.344968000  | 8.910889000  |
| C  | 2.123771000  | 6.962058000  | 11.079584000 |
| C  | 1.920331000  | 7.345975000  | 12.431077000 |
| H  | 1.708851000  | 6.573860000  | 13.162733000 |
| C  | 6.038581000  | 7.197919000  | 5.929188000  |
| C  | 2.837163000  | 8.041481000  | 7.609479000  |
| H  | 3.013741000  | 9.102942000  | 7.800023000  |
| C  | 4.052461000  | 7.444898000  | 6.944296000  |
| C  | 6.671452000  | 9.904832000  | 6.073704000  |
| H  | 6.920094000  | 10.957536000 | 6.145717000  |
| C  | 2.131870000  | 5.769403000  | 10.374221000 |
| H  | 1.985021000  | 4.763736000  | 10.735374000 |
| C  | 2.482776000  | 9.307618000  | 10.474443000 |
| H  | 2.714821000  | 10.020729000 | 9.689979000  |
| C  | 5.400761000  | 5.973020000  | 6.065343000  |
| H  | 5.738409000  | 4.995119000  | 5.756280000  |
| C  | 2.284912000  | 9.652315000  | 11.775425000 |
| H  | 2.352477000  | 10.700395000 | 12.043531000 |
| C  | 1.997033000  | 8.667135000  | 12.773927000 |
| H  | 1.844414000  | 8.977504000  | 13.802037000 |
| C  | 7.580238000  | 8.987776000  | 5.456474000  |
| H  | 8.517340000  | 9.353790000  | 5.050681000  |
| C  | 7.268771000  | 7.657393000  | 5.391686000  |
| H  | 7.939632000  | 6.933536000  | 4.941544000  |
| O  | 1.458850000  | 4.737751000  | 6.281220000  |
| O  | 0.525270000  | 3.236691000  | 7.648990000  |
| O  | 4.122109000  | 3.556396000  | 8.953798000  |
| O  | 3.836305000  | 2.898532000  | 6.886086000  |
| C  | 0.587579000  | 3.799442000  | 6.549813000  |
| C  | -0.354325000 | 3.443911000  | 5.410740000  |
| H  | 0.217934000  | 2.964846000  | 4.609548000  |
| H  | -1.130456000 | 2.760737000  | 5.757263000  |
| H  | -0.807406000 | 4.347220000  | 4.991302000  |
| C  | 4.373247000  | 2.718838000  | 8.024732000  |
| C  | 5.258220000  | 1.528891000  | 8.283770000  |
| H  | 5.986899000  | 1.757877000  | 9.063608000  |
| H  | 4.634643000  | 0.696886000  | 8.628751000  |
| H  | 5.759088000  | 1.220063000  | 7.364217000  |
| Cu | 1.090811000  | 11.379186000 | 6.579549000  |
| Cu | 2.881840000  | 4.556029000  | 7.671171000  |

-----  
**{Zn<sup>II</sup>-L1<sup>-</sup>}** for **1b** (S=0)  
 -----

|    |             |              |             |
|----|-------------|--------------|-------------|
| Zn | 1.337904000 | 11.487124000 | 6.737186000 |
|----|-------------|--------------|-------------|

|   |              |              |              |
|---|--------------|--------------|--------------|
| O | 3.027483000  | 11.646140000 | 8.106124000  |
| O | 3.084901000  | 12.826266000 | 6.224410000  |
| N | 2.361636000  | 8.132656000  | 4.199539000  |
| N | -0.745598000 | 7.923471000  | 8.040241000  |
| O | -0.153222000 | 12.587591000 | 5.588224000  |
| N | 0.165460000  | 9.899445000  | 7.604175000  |
| N | 2.042099000  | 10.018770000 | 5.324459000  |
| C | -1.130227000 | 6.598052000  | 8.054096000  |
| H | -0.694100000 | 5.962377000  | 7.294150000  |
| C | 1.685485000  | 8.710293000  | 5.269761000  |
| O | 0.030143000  | 13.018198000 | 7.760279000  |
| C | 3.169330000  | 9.141585000  | 3.583489000  |
| C | 3.598475000  | 12.462537000 | 7.322859000  |
| C | 3.956057000  | 8.770946000  | 2.463312000  |
| H | 4.570663000  | 9.533612000  | 1.993697000  |
| C | -1.257074000 | 8.853115000  | 9.001533000  |
| C | 0.805932000  | 8.010029000  | 6.117179000  |
| H | 0.646104000  | 6.956750000  | 5.930292000  |
| C | 0.124087000  | 8.605879000  | 7.195231000  |
| C | -2.009882000 | 6.151447000  | 8.989112000  |
| H | -2.298357000 | 5.105588000  | 8.983333000  |
| C | 2.932548000  | 10.279655000 | 4.318422000  |
| H | 3.351559000  | 11.268691000 | 4.207494000  |
| C | 2.343842000  | 6.839639000  | 3.717274000  |
| H | 1.702253000  | 6.140391000  | 4.238020000  |
| C | -0.662694000 | 10.051719000 | 8.683046000  |
| H | -0.782709000 | 11.021739000 | 9.142047000  |
| C | 3.103008000  | 6.500757000  | 2.641962000  |
| H | 3.073773000  | 5.479096000  | 2.278053000  |
| C | 3.934184000  | 7.485688000  | 1.992805000  |
| H | 4.535024000  | 7.199863000  | 1.135094000  |
| C | -2.551040000 | 7.054798000  | 9.975755000  |
| H | -3.252424000 | 6.683346000  | 10.716335000 |
| C | -2.174289000 | 8.370751000  | 9.969574000  |
| H | -2.564458000 | 9.073025000  | 10.700692000 |
| C | 4.964379000  | 13.022003000 | 7.706879000  |
| H | 4.939225000  | 14.115381000 | 7.665685000  |
| H | 5.710862000  | 12.687517000 | 6.978400000  |
| H | 5.258434000  | 12.693846000 | 8.705462000  |
| C | -0.503336000 | 13.218933000 | 6.629717000  |
| C | -1.613436000 | 14.259506000 | 6.524841000  |
| H | -1.979861000 | 14.343665000 | 5.500187000  |
| H | -1.237537000 | 15.230124000 | 6.864165000  |
| H | -2.438042000 | 13.981820000 | 7.189682000  |

---

**{Zn<sup>II</sup>-L1<sup>•</sup>}** for **1b** (*S*=1/2)

---

|    |             |              |             |
|----|-------------|--------------|-------------|
| Zn | 1.357764000 | 11.614479000 | 6.755332000 |
| O  | 2.986320000 | 11.589568000 | 8.148521000 |

|   |              |              |              |
|---|--------------|--------------|--------------|
| O | 3.167185000  | 12.746222000 | 6.268265000  |
| N | 2.349273000  | 8.164426000  | 4.186615000  |
| N | -0.724662000 | 7.947751000  | 8.060740000  |
| O | -0.127967000 | 12.548738000 | 5.524258000  |
| N | 0.171885000  | 9.934713000  | 7.598483000  |
| N | 2.041774000  | 10.050633000 | 5.332660000  |
| C | -1.097708000 | 6.620708000  | 8.091540000  |
| H | -0.667059000 | 5.972894000  | 7.339848000  |
| C | 1.684320000  | 8.746527000  | 5.264732000  |
| O | -0.062423000 | 12.990627000 | 7.693675000  |
| C | 3.143219000  | 9.162614000  | 3.587303000  |
| C | 3.642337000  | 12.362590000 | 7.382922000  |
| C | 3.927225000  | 8.826395000  | 2.462448000  |
| H | 4.536097000  | 9.598733000  | 2.005241000  |
| C | -1.225431000 | 8.871222000  | 9.000095000  |
| C | 0.811371000  | 8.051629000  | 6.122614000  |
| H | 0.651525000  | 6.997570000  | 5.936589000  |
| C | 0.133583000  | 8.639182000  | 7.207179000  |
| C | -1.969515000 | 6.188911000  | 9.046006000  |
| H | -2.253818000 | 5.143035000  | 9.059803000  |
| C | 2.914447000  | 10.314303000 | 4.342626000  |
| H | 3.345077000  | 11.299269000 | 4.234341000  |
| C | 2.323939000  | 6.877122000  | 3.693322000  |
| H | 1.685755000  | 6.168726000  | 4.204204000  |
| C | -0.636141000 | 10.091303000 | 8.663225000  |
| H | -0.768303000 | 11.062840000 | 9.117090000  |
| C | 3.082484000  | 6.557824000  | 2.606986000  |
| H | 3.052781000  | 5.542462000  | 2.228786000  |
| C | 3.902114000  | 7.543634000  | 1.974295000  |
| H | 4.498322000  | 7.271187000  | 1.110541000  |
| C | -2.499447000 | 7.097307000  | 10.014471000 |
| H | -3.191214000 | 6.735397000  | 10.766962000 |
| C | -2.128257000 | 8.418616000  | 9.986484000  |
| H | -2.509891000 | 9.133571000  | 10.707228000 |
| C | 5.005103000  | 12.863435000 | 7.821207000  |
| H | 4.889754000  | 13.864071000 | 8.251895000  |
| H | 5.674234000  | 12.948810000 | 6.961963000  |
| H | 5.434824000  | 12.207638000 | 8.580084000  |
| C | -0.567535000 | 13.170443000 | 6.541197000  |
| C | -1.695675000 | 14.169885000 | 6.372788000  |
| H | -2.248455000 | 13.981200000 | 5.451176000  |
| H | -1.268242000 | 15.177254000 | 6.322422000  |
| H | -2.364403000 | 14.138362000 | 7.236108000  |

-----  
**1b, {Zn<sup>II</sup>-(μ-(L1)<sub>2</sub>)-Zn<sup>II</sup>} (S=0)**  
 -----

|    |             |              |             |
|----|-------------|--------------|-------------|
| Zn | 1.370680000 | 11.601105000 | 6.713304000 |
| O  | 3.019794000 | 11.324637000 | 8.166261000 |
| O  | 3.087695000 | 12.966563000 | 6.689254000 |

|   |              |              |              |
|---|--------------|--------------|--------------|
| N | 2.053624000  | 8.141715000  | 4.166700000  |
| N | -0.706027000 | 7.952128000  | 7.880877000  |
| O | 0.090045000  | 12.666616000 | 5.387582000  |
| N | 0.169604000  | 9.953670000  | 7.559732000  |
| N | 1.997828000  | 10.072046000 | 5.246529000  |
| C | -0.978575000 | 6.592666000  | 7.905455000  |
| H | -0.251299000 | 5.946331000  | 7.432698000  |
| C | 1.854778000  | 8.751353000  | 5.381237000  |
| O | -0.054687000 | 13.017756000 | 7.568895000  |
| C | 2.334669000  | 9.158588000  | 3.226871000  |
| C | 3.563255000  | 12.391447000 | 7.701524000  |
| C | 2.575191000  | 8.795325000  | 1.876148000  |
| H | 2.790838000  | 9.580638000  | 1.159862000  |
| C | -1.588579000 | 8.893929000  | 8.456780000  |
| C | 1.545158000  | 8.038155000  | 6.670572000  |
| H | 1.329550000  | 6.991169000  | 6.447313000  |
| C | 0.347848000  | 8.650063000  | 7.347180000  |
| C | -2.120637000 | 6.159279000  | 8.503726000  |
| H | -2.323146000 | 5.094531000  | 8.520575000  |
| C | 2.288131000  | 10.343273000 | 3.944595000  |
| H | 2.423345000  | 11.354428000 | 3.592597000  |
| C | 1.998258000  | 6.803796000  | 3.794452000  |
| H | 1.761673000  | 6.075397000  | 4.563362000  |
| C | -1.001007000 | 10.129315000 | 8.232482000  |
| H | -1.342299000 | 11.118494000 | 8.496563000  |
| C | 2.230050000  | 6.477736000  | 2.493854000  |
| H | 2.184933000  | 5.431861000  | 2.212359000  |
| C | 2.526112000  | 7.477984000  | 1.513777000  |
| H | 2.706706000  | 7.183079000  | 0.485636000  |
| C | -3.038219000 | 7.080886000  | 9.103304000  |
| H | -3.940394000 | 6.706110000  | 9.574497000  |
| C | -2.774967000 | 8.422660000  | 9.077255000  |
| H | -3.449991000 | 9.147475000  | 9.519215000  |
| C | 4.781170000  | 12.953775000 | 8.406356000  |
| H | 4.466771000  | 13.388623000 | 9.360992000  |
| H | 5.255702000  | 13.729077000 | 7.804099000  |
| H | 5.493906000  | 12.156090000 | 8.634175000  |
| C | -0.414198000 | 13.284497000 | 6.378970000  |
| C | -1.432486000 | 14.377863000 | 6.130095000  |
| H | -2.015158000 | 14.163780000 | 5.232049000  |
| H | -0.898838000 | 15.321133000 | 5.969569000  |
| H | -2.087091000 | 14.500841000 | 6.994774000  |
| N | 2.303970000  | 7.934567000  | 10.150564000 |
| N | 5.063551000  | 8.124029000  | 6.436326000  |
| N | 4.187934000  | 6.122504000  | 6.757605000  |
| N | 2.359690000  | 6.004208000  | 9.070781000  |
| C | 5.336093000  | 9.483491000  | 6.411664000  |
| H | 4.608816000  | 10.129851000 | 6.884386000  |
| C | 2.502770000  | 7.324895000  | 8.936037000  |

|    |              |              |              |
|----|--------------|--------------|--------------|
| C  | 2.022916000  | 6.917723000  | 11.090423000 |
| C  | 1.782435000  | 7.281025000  | 12.441144000 |
| H  | 1.566779000  | 6.495735000  | 13.157453000 |
| C  | 5.946104000  | 7.182198000  | 5.860478000  |
| C  | 2.812386000  | 8.038060000  | 7.646683000  |
| H  | 3.028011000  | 9.085047000  | 7.869917000  |
| C  | 4.009687000  | 7.426122000  | 6.970082000  |
| C  | 6.478147000  | 9.916847000  | 5.813356000  |
| H  | 6.680655000  | 10.981595000 | 5.796445000  |
| C  | 2.069398000  | 5.733021000  | 10.372727000 |
| H  | 1.934161000  | 4.721879000  | 10.724750000 |
| C  | 2.359389000  | 9.272491000  | 10.522782000 |
| H  | 2.595984000  | 10.000868000 | 9.753855000  |
| C  | 5.358549000  | 5.946820000  | 6.084873000  |
| H  | 5.699855000  | 4.957624000  | 5.820872000  |
| C  | 2.127634000  | 9.598589000  | 11.823377000 |
| H  | 2.172790000  | 10.644468000 | 12.104847000 |
| C  | 1.831561000  | 8.598372000  | 12.803484000 |
| H  | 1.650996000  | 8.893306000  | 13.831622000 |
| C  | 7.395726000  | 8.995208000  | 5.213823000  |
| H  | 8.297894000  | 9.369960000  | 4.742595000  |
| C  | 7.132481000  | 7.653435000  | 5.239957000  |
| H  | 7.807503000  | 6.928594000  | 4.798035000  |
| Zn | 2.986813000  | 4.475114000  | 7.604060000  |
| O  | 1.337798000  | 4.751617000  | 6.150960000  |
| O  | 1.269839000  | 3.109624000  | 7.627888000  |
| O  | 4.267263000  | 3.409557000  | 8.929923000  |
| O  | 4.412248000  | 3.058418000  | 6.748626000  |
| C  | 0.794347000  | 3.684759000  | 6.615595000  |
| C  | -0.423475000 | 3.122402000  | 5.910626000  |
| H  | -0.108959000 | 2.687576000  | 4.956019000  |
| H  | -0.898045000 | 2.347076000  | 6.512822000  |
| H  | -1.136213000 | 3.920067000  | 5.682743000  |
| C  | 4.771600000  | 2.791658000  | 7.938594000  |
| C  | 5.789795000  | 1.698231000  | 8.187587000  |
| H  | 6.372269000  | 1.912194000  | 9.085789000  |
| H  | 5.256078000  | 0.754960000  | 8.347875000  |
| H  | 6.444593000  | 1.575329000  | 7.323042000  |

-----  
**{Cu<sup>II</sup>-L4<sup>-</sup>}** for **1c** (*S*=1/2)  
 -----

|    |             |             |              |
|----|-------------|-------------|--------------|
| Cu | 3.944204000 | 3.442572000 | 9.178226000  |
| O  | 1.414912000 | 5.539560000 | 9.229478000  |
| O  | 3.127681000 | 2.946376000 | 7.429486000  |
| N  | 5.564929000 | 2.205698000 | 9.022691000  |
| O  | 1.905105000 | 1.756867000 | 8.886513000  |
| N  | 4.184475000 | 3.629473000 | 11.141013000 |
| C  | 6.479700000 | 2.059999000 | 9.975697000  |
| C  | 6.244607000 | 3.145915000 | 14.170575000 |

|   |              |              |              |
|---|--------------|--------------|--------------|
| H | 6.802541000  | 2.267280000  | 13.865073000 |
| C | 4.619357000  | 4.872705000  | 13.680937000 |
| C | 5.397789000  | 3.777535000  | 13.247419000 |
| C | 7.718217000  | 1.256385000  | 9.679772000  |
| C | 8.116606000  | 1.088857000  | 8.336229000  |
| C | 6.360477000  | 3.611464000  | 15.479946000 |
| H | 7.023162000  | 3.104863000  | 16.177103000 |
| C | 9.291333000  | 0.393182000  | 8.039536000  |
| H | 9.585381000  | 0.274291000  | 6.998640000  |
| C | 5.758706000  | 1.493131000  | 7.760389000  |
| H | 5.525827000  | 0.421638000  | 7.883337000  |
| H | 5.046171000  | 1.900080000  | 7.042445000  |
| C | 5.285634000  | 3.335193000  | 11.814066000 |
| C | 6.384834000  | 2.637370000  | 11.260789000 |
| C | 3.091704000  | 4.321208000  | 11.830832000 |
| H | 2.391158000  | 4.693477000  | 11.080201000 |
| H | 2.547170000  | 3.602619000  | 12.465032000 |
| C | 8.496337000  | 0.664512000  | 10.687016000 |
| H | 8.170013000  | 0.733147000  | 11.718937000 |
| C | 9.665598000  | -0.031277000 | 10.382258000 |
| H | 10.250420000 | -0.480048000 | 11.181220000 |
| C | 10.073957000 | -0.159740000 | 9.053743000  |
| H | 10.982618000 | -0.703604000 | 8.807613000  |
| C | 1.231716000  | 1.785618000  | 6.572987000  |
| H | 0.664744000  | 2.668345000  | 6.258100000  |
| H | 0.534825000  | 1.000139000  | 6.872880000  |
| H | 1.825719000  | 1.455735000  | 5.714725000  |
| C | 4.745977000  | 5.334950000  | 14.993484000 |
| H | 4.141583000  | 6.180731000  | 15.314703000 |
| C | 2.141668000  | 2.169292000  | 7.740717000  |
| C | 3.635369000  | 5.456341000  | 12.699312000 |
| H | 2.824576000  | 5.974672000  | 13.224827000 |
| H | 4.124518000  | 6.190124000  | 12.043143000 |
| C | 7.201311000  | 1.636896000  | 7.271738000  |
| H | 7.409310000  | 2.702032000  | 7.091814000  |
| H | 7.352365000  | 1.109708000  | 6.321778000  |
| C | 5.617024000  | 4.718258000  | 15.892601000 |
| H | 5.699221000  | 5.086335000  | 16.912393000 |
| O | 3.638988000  | 5.386431000  | 8.845950000  |
| C | 2.498742000  | 7.248681000  | 7.931792000  |
| H | 2.654808000  | 7.007886000  | 6.874140000  |
| H | 3.332673000  | 7.885348000  | 8.243993000  |
| H | 1.553370000  | 7.785402000  | 8.041851000  |
| C | 2.479990000  | 5.944689000  | 8.746381000  |
| H | 7.272522000  | 2.585634000  | 11.872851000 |

-----  
**{Cu<sup>II</sup>-L4<sup>•</sup>}** for **1c** (S=1)  
 -----

|    |             |             |             |
|----|-------------|-------------|-------------|
| Cu | 3.514597000 | 3.164273000 | 9.101336000 |
|----|-------------|-------------|-------------|

|   |              |              |              |
|---|--------------|--------------|--------------|
| O | 3.054150000  | 5.783140000  | 9.260940000  |
| O | 2.683447000  | 2.632176000  | 7.307232000  |
| N | 5.246991000  | 1.703595000  | 9.160777000  |
| O | 1.700007000  | 2.150656000  | 9.207136000  |
| N | 3.789004000  | 3.424094000  | 11.084752000 |
| C | 6.277556000  | 1.997745000  | 9.923596000  |
| C | 5.977146000  | 3.226419000  | 14.053565000 |
| H | 6.650853000  | 2.437251000  | 13.735332000 |
| C | 4.095902000  | 4.702427000  | 13.620133000 |
| C | 5.009496000  | 3.726133000  | 13.168210000 |
| C | 7.665667000  | 1.589028000  | 9.542831000  |
| C | 7.930309000  | 1.379514000  | 8.173219000  |
| C | 6.066345000  | 3.711424000  | 15.356573000 |
| H | 6.816438000  | 3.311780000  | 16.032170000 |
| C | 9.218588000  | 1.027908000  | 7.767568000  |
| H | 9.418367000  | 0.873786000  | 6.710299000  |
| C | 5.504332000  | 1.023263000  | 7.891902000  |
| H | 5.590137000  | -0.055921000 | 8.100091000  |
| H | 4.626674000  | 1.170614000  | 7.259404000  |
| C | 4.912132000  | 3.274274000  | 11.746768000 |
| C | 6.100552000  | 2.736104000  | 11.138294000 |
| C | 2.619037000  | 3.970954000  | 11.783010000 |
| H | 1.894042000  | 4.269308000  | 11.028196000 |
| H | 2.179680000  | 3.166092000  | 12.390686000 |
| C | 8.694717000  | 1.399904000  | 10.477367000 |
| H | 8.498615000  | 1.509457000  | 11.539360000 |
| C | 9.975151000  | 1.039078000  | 10.061893000 |
| H | 10.760520000 | 0.892047000  | 10.797129000 |
| C | 10.240856000 | 0.862748000  | 8.703012000  |
| H | 11.237555000 | 0.583732000  | 8.373712000  |
| C | 0.527644000  | 1.548654000  | 7.178251000  |
| H | -0.130420000 | 2.366129000  | 6.864400000  |
| H | -0.040096000 | 0.865790000  | 7.812107000  |
| H | 0.878278000  | 1.038801000  | 6.278192000  |
| C | 4.203393000  | 5.188772000  | 14.923928000 |
| H | 3.502381000  | 5.945327000  | 15.266667000 |
| C | 1.693675000  | 2.128755000  | 7.935864000  |
| C | 3.021165000  | 5.151551000  | 12.663112000 |
| H | 2.149234000  | 5.530420000  | 13.205632000 |
| H | 3.376881000  | 5.959866000  | 12.010416000 |
| C | 6.777313000  | 1.532547000  | 7.214183000  |
| H | 6.633262000  | 2.589517000  | 6.951072000  |
| H | 6.963220000  | 0.984865000  | 6.284740000  |
| C | 5.185569000  | 4.704249000  | 15.788963000 |
| H | 5.251843000  | 5.088169000  | 16.802812000 |
| O | 4.779230000  | 4.569389000  | 8.508192000  |
| C | 4.897653000  | 6.928693000  | 8.206002000  |
| H | 4.862627000  | 6.942410000  | 7.111530000  |
| H | 5.951111000  | 6.897589000  | 8.497388000  |



|   |             |             |              |
|---|-------------|-------------|--------------|
| H | 4.424058000 | 7.833691000 | 8.589269000  |
| C | 4.165527000 | 5.692301000 | 8.711638000  |
| H | 7.009231000 | 2.943487000 | 11.687520000 |

---

**1c, {Cu<sup>II</sup>-(μ-(L4)<sub>2</sub>)-Cu<sup>II</sup>} (S=1)**

---

|    |              |              |              |
|----|--------------|--------------|--------------|
| Cu | 4.141345000  | 3.772433000  | 9.145541000  |
| O  | 2.875594000  | 5.305596000  | 9.099433000  |
| O  | 3.343749000  | 3.138802000  | 7.425243000  |
| N  | 5.824616000  | 2.565569000  | 9.040280000  |
| O  | 2.354068000  | 2.112413000  | 9.134277000  |
| N  | 4.462244000  | 3.926538000  | 11.164609000 |
| C  | 6.761059000  | 2.479170000  | 9.925214000  |
| C  | 6.640089000  | 3.194239000  | 14.061507000 |
| H  | 7.532199000  | 2.792092000  | 13.600143000 |
| C  | 4.451754000  | 4.255152000  | 13.995655000 |
| C  | 5.569003000  | 3.713157000  | 13.313650000 |
| C  | 7.773348000  | 1.388942000  | 9.868600000  |
| C  | 7.989937000  | 0.747479000  | 8.625086000  |
| C  | 6.602174000  | 3.204139000  | 15.455243000 |
| H  | 7.444819000  | 2.798401000  | 16.005359000 |
| C  | 8.920823000  | -0.285276000 | 8.532192000  |
| H  | 9.083663000  | -0.767227000 | 7.571722000  |
| C  | 5.780844000  | 1.579086000  | 7.941904000  |
| H  | 5.255134000  | 0.690871000  | 8.320435000  |
| H  | 5.164756000  | 2.009670000  | 7.154411000  |
| C  | 5.551166000  | 3.731359000  | 11.826543000 |
| C  | 6.859264000  | 3.540806000  | 11.041344000 |
| C  | 3.178381000  | 4.069654000  | 11.877367000 |
| H  | 2.485577000  | 4.561414000  | 11.195580000 |
| H  | 2.800964000  | 3.055759000  | 12.064595000 |
| C  | 8.481416000  | 0.945611000  | 10.996675000 |
| H  | 8.353782000  | 1.401502000  | 11.969467000 |
| C  | 9.392709000  | -0.104475000 | 10.892710000 |
| H  | 9.922540000  | -0.435364000 | 11.779725000 |
| C  | 9.622401000  | -0.715143000 | 9.660777000  |
| H  | 10.336647000 | -1.529332000 | 9.577753000  |
| C  | 1.415161000  | 1.811758000  | 6.928162000  |
| H  | 0.748062000  | 2.618375000  | 6.606193000  |
| H  | 0.823351000  | 1.022041000  | 7.392996000  |
| H  | 1.921645000  | 1.432968000  | 6.036180000  |
| C  | 4.432415000  | 4.262415000  | 15.389207000 |
| H  | 3.571587000  | 4.681431000  | 15.903916000 |
| C  | 2.423342000  | 2.370509000  | 7.915720000  |
| C  | 3.335661000  | 4.847880000  | 13.175153000 |
| H  | 2.393018000  | 4.838444000  | 13.731643000 |
| H  | 3.560731000  | 5.899898000  | 12.947333000 |
| C  | 7.173798000  | 1.215290000  | 7.451522000  |
| H  | 7.638537000  | 2.092315000  | 6.980828000  |

|    |              |             |              |
|----|--------------|-------------|--------------|
| H  | 7.107636000  | 0.436884000 | 6.684806000  |
| C  | 5.499347000  | 3.736289000 | 16.122099000 |
| H  | 5.466596000  | 3.744246000 | 17.207923000 |
| O  | 4.610028000  | 6.111380000 | 7.944265000  |
| C  | 2.502987000  | 7.276210000 | 7.815201000  |
| H  | 1.823040000  | 6.858765000 | 7.065042000  |
| H  | 3.083031000  | 8.078912000 | 7.356341000  |
| H  | 1.888096000  | 7.664468000 | 8.631421000  |
| C  | 3.417385000  | 6.167643000 | 8.313406000  |
| N  | 8.400682000  | 5.903487000 | 12.454133000 |
| N  | 9.762058000  | 4.541567000 | 10.329711000 |
| C  | 7.463631000  | 5.989514000 | 11.569807000 |
| C  | 7.583798000  | 5.275463000 | 7.433536000  |
| H  | 6.691910000  | 5.677728000 | 7.895224000  |
| C  | 9.771851000  | 4.213930000 | 7.498548000  |
| C  | 8.654901000  | 4.755992000 | 8.180984000  |
| C  | 6.450776000  | 7.079187000 | 11.627254000 |
| C  | 6.234613000  | 7.720287000 | 12.871035000 |
| C  | 7.621390000  | 5.266023000 | 6.039792000  |
| H  | 6.778719000  | 5.672165000 | 5.490016000  |
| C  | 5.303117000  | 8.752414000 | 12.964750000 |
| H  | 5.140615000  | 9.234079000 | 13.925421000 |
| C  | 8.444677000  | 6.889957000 | 13.552518000 |
| H  | 8.969461000  | 7.778560000 | 13.173601000 |
| H  | 9.061683000  | 6.459788000 | 14.339514000 |
| C  | 8.673056000  | 4.737307000 | 9.668081000  |
| C  | 7.365181000  | 4.927969000 | 10.453605000 |
| C  | 11.045733000 | 4.398140000 | 9.616682000  |
| H  | 11.738392000 | 3.905759000 | 10.298177000 |
| H  | 11.423642000 | 5.411928000 | 9.429900000  |
| C  | 5.741644000  | 7.522261000 | 10.499752000 |
| H  | 5.868890000  | 7.066684000 | 9.526757000  |
| C  | 4.829732000  | 8.571731000 | 10.604527000 |
| H  | 4.299095000  | 8.902417000 | 9.717919000  |
| C  | 4.600482000  | 9.182029000 | 11.836722000 |
| H  | 3.885765000  | 9.995741000 | 11.920385000 |
| C  | 9.790885000  | 4.207153000 | 6.104987000  |
| H  | 10.651490000 | 3.788088000 | 5.589945000  |
| C  | 10.887935000 | 3.620536000 | 8.318588000  |
| H  | 11.830469000 | 3.629926000 | 7.761912000  |
| H  | 10.662604000 | 2.568482000 | 8.545994000  |
| C  | 7.051844000  | 7.252786000 | 14.043959000 |
| H  | 6.587986000  | 6.375376000 | 14.514803000 |
| H  | 7.118046000  | 8.031096000 | 14.810769000 |
| C  | 8.723929000  | 4.733809000 | 5.372510000  |
| H  | 8.756434000  | 4.726208000 | 4.286677000  |
| Cu | 10.083868000 | 4.696430000 | 12.348500000 |
| O  | 11.349056000 | 3.162697000 | 12.395174000 |
| O  | 10.882632000 | 5.331267000 | 14.067814000 |

|   |              |             |              |
|---|--------------|-------------|--------------|
| O | 11.871788000 | 6.355758000 | 12.357337000 |
| C | 12.811902000 | 6.658107000 | 14.562716000 |
| H | 13.477613000 | 5.851172000 | 14.886728000 |
| H | 13.405004000 | 7.445933000 | 14.096332000 |
| H | 12.305732000 | 7.039666000 | 15.453709000 |
| C | 11.803057000 | 6.098786000 | 13.576163000 |
| O | 9.613878000  | 2.358963000 | 13.550578000 |
| C | 11.719784000 | 1.192060000 | 13.679928000 |
| H | 12.400741000 | 1.609186000 | 14.429344000 |
| H | 11.139017000 | 0.390405000 | 14.139697000 |
| H | 12.333677000 | 0.802447000 | 12.863599000 |
| C | 10.806483000 | 2.301392000 | 13.181434000 |
| H | 7.632576000  | 3.222885000 | 11.734337000 |
| H | 6.591782000  | 5.246006000 | 9.760772000  |

-----  
**3<sup>-</sup>, {Ru<sup>II</sup>-L3<sup>-</sup>} (S=0)**  
 -----

|    |              |              |             |
|----|--------------|--------------|-------------|
| Ru | 0.242596000  | 18.290121000 | 6.794500000 |
| O  | -0.781906000 | 18.370118000 | 4.972294000 |
| O  | 1.266754000  | 18.173884000 | 8.618037000 |
| O  | 1.521556000  | 16.763326000 | 6.063570000 |
| O  | -1.073169000 | 16.738943000 | 7.393680000 |
| N  | 2.444195000  | 21.735127000 | 5.657574000 |
| N  | 1.555274000  | 19.776404000 | 6.186721000 |
| N  | -1.008174000 | 19.786169000 | 7.520869000 |
| N  | -1.960147000 | 21.753512000 | 7.892335000 |
| C  | 2.781288000  | 23.074912000 | 5.574178000 |
| H  | 2.023447000  | 23.779754000 | 5.881176000 |
| C  | -2.103213000 | 19.573805000 | 8.308698000 |
| H  | -2.377484000 | 18.575113000 | 8.609576000 |
| C  | 3.443250000  | 20.734296000 | 5.434261000 |
| C  | 4.712098000  | 21.137136000 | 4.949951000 |
| H  | 5.447219000  | 20.365213000 | 4.737071000 |
| C  | 5.000871000  | 22.465730000 | 4.778464000 |
| H  | 5.971279000  | 22.780907000 | 4.406001000 |
| C  | 2.845007000  | 19.550969000 | 5.798446000 |
| H  | 3.241877000  | 18.547624000 | 5.786705000 |
| C  | 4.012734000  | 23.450840000 | 5.132766000 |
| H  | 4.244808000  | 24.509927000 | 5.074523000 |
| C  | -4.186101000 | 22.508304000 | 9.415985000 |
| H  | -5.061384000 | 22.833274000 | 9.970960000 |
| C  | -2.211665000 | 23.096212000 | 8.116600000 |
| H  | -1.502454000 | 23.793676000 | 7.697140000 |
| C  | 0.065486000  | 21.771655000 | 6.430674000 |
| C  | 1.284003000  | 21.107857000 | 6.110519000 |
| C  | -2.746999000 | 20.762045000 | 8.560388000 |
| C  | -0.905499000 | 21.115232000 | 7.239348000 |
| C  | -3.297229000 | 23.483908000 | 8.839917000 |
| H  | -3.468528000 | 24.544822000 | 8.994974000 |

|   |              |              |              |
|---|--------------|--------------|--------------|
| C | -3.892020000 | 21.176493000 | 9.284507000  |
| H | -4.511234000 | 20.410807000 | 9.744846000  |
| C | -0.554257000 | 17.584448000 | 4.004818000  |
| C | -0.926222000 | 16.080410000 | 8.470212000  |
| C | -1.467279000 | 17.789205000 | 2.801492000  |
| H | -2.511571000 | 17.661238000 | 3.110846000  |
| H | -1.251718000 | 17.096867000 | 1.981506000  |
| H | -1.365183000 | 18.817572000 | 2.434703000  |
| C | 1.020759000  | 17.308529000 | 9.511197000  |
| C | 1.935396000  | 17.383483000 | 10.728157000 |
| H | 2.977324000  | 17.259321000 | 10.409148000 |
| H | 1.701612000  | 16.625328000 | 11.482351000 |
| H | 1.856712000  | 18.376823000 | 11.185982000 |
| C | 0.427338000  | 16.569608000 | 3.933359000  |
| H | 0.459063000  | 15.994227000 | 3.013319000  |
| C | 0.019447000  | 16.311636000 | 9.489278000  |
| H | -0.022233000 | 15.649993000 | 10.348972000 |
| C | 1.370514000  | 16.226889000 | 4.920908000  |
| C | -1.906887000 | 14.925686000 | 8.644949000  |
| H | -2.934317000 | 15.295460000 | 8.542774000  |
| H | -1.803199000 | 14.421927000 | 9.611301000  |
| H | -1.752194000 | 14.190733000 | 7.845177000  |
| C | 2.346316000  | 15.093975000 | 4.621979000  |
| H | 3.376103000  | 15.465962000 | 4.692028000  |
| H | 2.196552000  | 14.653354000 | 3.631221000  |
| H | 2.238560000  | 14.308988000 | 5.380413000  |
| C | -0.334364000 | 23.010197000 | 5.644527000  |
| H | -1.415519000 | 23.012610000 | 5.455261000  |
| H | -0.101127000 | 23.995349000 | 6.094185000  |
| H | 0.145297000  | 23.007878000 | 4.657275000  |

---

**3, {Ru<sup>II</sup>-L3\*} (S=1/2)**

---

|    |              |              |             |
|----|--------------|--------------|-------------|
| Ru | 0.264320000  | 18.320494000 | 6.868466000 |
| O  | -0.757031000 | 18.451409000 | 5.068167000 |
| O  | 1.281851000  | 18.121939000 | 8.676740000 |
| O  | 1.507173000  | 16.810405000 | 6.117136000 |
| O  | -1.069715000 | 16.800496000 | 7.429576000 |
| N  | 2.433942000  | 21.718367000 | 5.625812000 |
| N  | 1.565422000  | 19.776748000 | 6.281297000 |
| N  | -0.957143000 | 19.803516000 | 7.592441000 |
| N  | -1.986416000 | 21.759333000 | 7.859501000 |
| C  | 2.745263000  | 23.049490000 | 5.409753000 |
| H  | 1.970519000  | 23.771838000 | 5.609007000 |
| C  | -2.019822000 | 19.600794000 | 8.413975000 |
| H  | -2.255204000 | 18.617832000 | 8.788001000 |
| C  | 3.442616000  | 20.729064000 | 5.513649000 |
| C  | 4.728377000  | 21.101391000 | 5.048264000 |
| H  | 5.478999000  | 20.325381000 | 4.937603000 |

|   |              |              |              |
|---|--------------|--------------|--------------|
| C | 5.000337000  | 22.413193000 | 4.767463000  |
| H | 5.980890000  | 22.711462000 | 4.411164000  |
| C | 2.862852000  | 19.551858000 | 5.942406000  |
| H | 3.283091000  | 18.560646000 | 6.003144000  |
| C | 3.987333000  | 23.402857000 | 4.976390000  |
| H | 4.199700000  | 24.453073000 | 4.808990000  |
| C | -4.206418000 | 22.499353000 | 9.388205000  |
| H | -5.075665000 | 22.815211000 | 9.955623000  |
| C | -2.327047000 | 23.096757000 | 7.968258000  |
| H | -1.690337000 | 23.806900000 | 7.466599000  |
| C | 0.031158000  | 21.735277000 | 6.363208000  |
| C | 1.274886000  | 21.096622000 | 6.101250000  |
| C | -2.697976000 | 20.788052000 | 8.605489000  |
| C | -0.917716000 | 21.116239000 | 7.227416000  |
| C | -3.414551000 | 23.471598000 | 8.697622000  |
| H | -3.658900000 | 24.526363000 | 8.760012000  |
| C | -3.838204000 | 21.181619000 | 9.348671000  |
| H | -4.389042000 | 20.417217000 | 9.887352000  |
| C | -0.537390000 | 17.688961000 | 4.070868000  |
| C | -0.923308000 | 16.068607000 | 8.462693000  |
| C | -1.463212000 | 17.925813000 | 2.890638000  |
| H | -2.497637000 | 17.729690000 | 3.196466000  |
| H | -1.221501000 | 17.294031000 | 2.031926000  |
| H | -1.411146000 | 18.977741000 | 2.587534000  |
| C | 1.052528000  | 17.207010000 | 9.531522000  |
| C | 1.993670000  | 17.214760000 | 10.723475000 |
| H | 3.021651000  | 17.060731000 | 10.374916000 |
| H | 1.748500000  | 16.443566000 | 11.458428000 |
| H | 1.962709000  | 18.196668000 | 11.209252000 |
| C | 0.440778000  | 16.680271000 | 3.971743000  |
| H | 0.470560000  | 16.127970000 | 3.039242000  |
| C | 0.043347000  | 16.224362000 | 9.473729000  |
| H | 0.009770000  | 15.515330000 | 10.293230000 |
| C | 1.372446000  | 16.300972000 | 4.956385000  |
| C | -1.922452000 | 14.930010000 | 8.577415000  |
| H | -2.942271000 | 15.322553000 | 8.494248000  |
| H | -1.824944000 | 14.376346000 | 9.515083000  |
| H | -1.778653000 | 14.236745000 | 7.740024000  |
| C | 2.338220000  | 15.169651000 | 4.648574000  |
| H | 3.369471000  | 15.519240000 | 4.776146000  |
| H | 2.218669000  | 14.776302000 | 3.635634000  |
| H | 2.185858000  | 14.355732000 | 5.367017000  |
| C | -0.350514000 | 22.984979000 | 5.592012000  |
| H | -1.427912000 | 22.997087000 | 5.399145000  |
| H | -0.099019000 | 23.941438000 | 6.077163000  |
| H | 0.135693000  | 22.986448000 | 4.611433000  |

---

**3<sup>+</sup>, {Ru<sup>III</sup>-L3<sup>•</sup>} (S=1)**

---

|    |              |              |              |
|----|--------------|--------------|--------------|
| Ru | 0.247381000  | 18.367705000 | 6.807282000  |
| O  | -0.733644000 | 18.451922000 | 5.031352000  |
| O  | 1.234640000  | 18.261193000 | 8.581310000  |
| O  | 1.478108000  | 16.899109000 | 6.070858000  |
| O  | -1.032989000 | 16.893612000 | 7.439711000  |
| N  | 2.518253000  | 21.817561000 | 5.778713000  |
| N  | 1.573347000  | 19.869483000 | 6.252060000  |
| N  | -1.015884000 | 19.887019000 | 7.478953000  |
| N  | -2.031391000 | 21.837657000 | 7.782702000  |
| C  | 2.877356000  | 23.152241000 | 5.671802000  |
| H  | 2.129641000  | 23.886239000 | 5.922415000  |
| C  | -2.157741000 | 19.646509000 | 8.160834000  |
| H  | -2.450774000 | 18.645168000 | 8.432560000  |
| C  | 3.487673000  | 20.812196000 | 5.587664000  |
| C  | 4.795256000  | 21.163628000 | 5.177856000  |
| H  | 5.517737000  | 20.370832000 | 5.015973000  |
| C  | 5.119150000  | 22.483968000 | 5.012062000  |
| H  | 6.115923000  | 22.774509000 | 4.698920000  |
| C  | 2.855240000  | 19.618566000 | 5.901465000  |
| H  | 3.244523000  | 18.612777000 | 5.881647000  |
| C  | 4.140367000  | 23.487019000 | 5.285454000  |
| H  | 4.394587000  | 24.537977000 | 5.205745000  |
| C  | -4.379317000 | 22.517570000 | 9.133109000  |
| H  | -5.293233000 | 22.812520000 | 9.636880000  |
| C  | -2.363046000 | 23.173580000 | 7.945469000  |
| H  | -1.670572000 | 23.904830000 | 7.563584000  |
| C  | 0.090693000  | 21.865326000 | 6.436115000  |
| C  | 1.329148000  | 21.205072000 | 6.177428000  |
| C  | -2.829707000 | 20.840713000 | 8.376457000  |
| C  | -0.918064000 | 21.218800000 | 7.207285000  |
| C  | -3.513232000 | 23.514963000 | 8.591696000  |
| H  | -3.750089000 | 24.567054000 | 8.703337000  |
| C  | -4.028276000 | 21.196951000 | 9.037048000  |
| H  | -4.637206000 | 20.408513000 | 9.466297000  |
| C  | -0.743067000 | 17.493590000 | 4.173671000  |
| C  | -0.735839000 | 16.036976000 | 8.349146000  |
| C  | -1.753802000 | 17.660218000 | 3.064433000  |
| H  | -2.756834000 | 17.746142000 | 3.497178000  |
| H  | -1.737924000 | 16.827912000 | 2.357755000  |
| H  | -1.554907000 | 18.592299000 | 2.523403000  |
| C  | 1.231667000  | 17.224336000 | 9.341105000  |
| C  | 2.250883000  | 17.262805000 | 10.454263000 |
| H  | 3.251876000  | 17.389511000 | 10.027126000 |
| H  | 2.233065000  | 16.359177000 | 11.067046000 |
| H  | 2.061445000  | 18.132322000 | 11.093917000 |
| C  | 0.109280000  | 16.377982000 | 4.181490000  |
| H  | -0.008435000 | 15.668459000 | 3.371646000  |
| C  | 0.355038000  | 16.132246000 | 9.230610000  |
| H  | 0.465992000  | 15.339133000 | 9.959937000  |

|   |              |              |             |
|---|--------------|--------------|-------------|
| C | 1.181817000  | 16.160501000 | 5.064262000 |
| C | -1.700921000 | 14.880998000 | 8.468215000 |
| H | -2.702277000 | 15.258806000 | 8.705471000 |
| H | -1.400766000 | 14.166133000 | 9.237068000 |
| H | -1.774234000 | 14.366021000 | 7.503945000 |
| C | 2.125284000  | 15.004053000 | 4.830955000 |
| H | 3.128439000  | 15.387232000 | 4.609347000 |
| H | 1.803778000  | 14.364006000 | 4.006745000 |
| H | 2.204852000  | 14.405949000 | 5.745123000 |
| C | -0.216161000 | 23.174649000 | 5.733955000 |
| H | -1.279152000 | 23.231110000 | 5.482470000 |
| H | 0.032846000  | 24.079719000 | 6.306447000 |
| H | 0.325655000  | 23.230744000 | 4.785816000 |

---

[3-H]<sup>+</sup>, {Ru<sup>III</sup>-HL3}<sup>+</sup> (S=1/2)

---

|    |              |              |             |
|----|--------------|--------------|-------------|
| Ru | 4.352226000  | 12.112250000 | 3.568661000 |
| O  | 6.160941000  | 12.311959000 | 2.653638000 |
| O  | 2.543796000  | 11.931525000 | 4.475187000 |
| O  | 4.681146000  | 13.862125000 | 4.571323000 |
| O  | 3.455423000  | 13.181077000 | 2.070124000 |
| N  | 6.296007000  | 9.324542000  | 6.128165000 |
| N  | 3.962255000  | 8.173437000  | 2.039869000 |
| N  | 3.953452000  | 10.299644000 | 2.598258000 |
| N  | 5.290698000  | 10.972249000 | 5.071348000 |
| C  | 6.180461000  | 10.394514000 | 7.041281000 |
| C  | 6.905416000  | 8.131567000  | 6.492363000 |
| H  | 6.972795000  | 7.364016000  | 5.733669000 |
| C  | 4.557319000  | 9.127856000  | 2.818748000 |
| C  | 7.384390000  | 7.987811000  | 7.756695000 |
| H  | 7.857246000  | 7.051843000  | 8.030685000 |
| C  | 5.548998000  | 11.406001000 | 6.339974000 |
| H  | 5.279970000  | 12.396827000 | 6.665381000 |
| C  | 5.745837000  | 8.868502000  | 3.701254000 |
| H  | 5.662554000  | 7.826424000  | 4.035542000 |
| C  | 2.924430000  | 8.793083000  | 1.307770000 |
| C  | 7.892390000  | 13.384108000 | 1.470817000 |
| H  | 8.458764000  | 13.553735000 | 2.391994000 |
| H  | 8.083278000  | 14.202077000 | 0.774878000 |
| H  | 8.261220000  | 12.451303000 | 1.031024000 |
| C  | 0.459473000  | 12.603132000 | 5.336454000 |
| H  | -0.067142000 | 12.215528000 | 4.458684000 |
| H  | -0.074218000 | 13.472748000 | 5.722254000 |
| H  | 0.448774000  | 11.811761000 | 6.093185000 |
| C  | 6.427213000  | 13.243247000 | 1.803862000 |
| C  | 2.952193000  | 10.122669000 | 1.686884000 |
| H  | 2.327381000  | 10.942711000 | 1.372510000 |
| C  | 7.082798000  | 9.021061000  | 2.920840000 |
| H  | 7.095927000  | 8.362137000  | 2.047394000 |

|   |             |              |              |
|---|-------------|--------------|--------------|
| H | 7.931965000 | 8.760326000  | 3.559591000  |
| H | 7.194696000 | 10.055688000 | 2.591284000  |
| C | 4.233858000 | 6.819286000  | 1.895218000  |
| H | 5.054661000 | 6.419752000  | 2.474953000  |
| C | 5.485969000 | 14.067071000 | 1.170395000  |
| H | 5.869705000 | 14.786195000 | 0.457791000  |
| C | 5.733804000 | 9.717839000  | 4.943106000  |
| C | 6.684554000 | 10.229550000 | 8.357912000  |
| H | 6.589413000 | 11.052958000 | 9.056935000  |
| C | 7.275074000 | 9.048240000  | 8.711838000  |
| H | 7.666448000 | 8.906526000  | 9.712807000  |
| C | 2.143011000 | 8.002876000  | 0.424164000  |
| H | 1.345390000 | 8.482503000  | -0.132149000 |
| C | 3.476742000 | 6.076162000  | 1.045227000  |
| H | 3.697153000 | 5.020144000  | 0.940481000  |
| C | 3.202763000 | 14.807161000 | 0.387138000  |
| H | 2.611519000 | 14.150941000 | -0.260445000 |
| H | 3.774618000 | 15.496126000 | -0.235867000 |
| H | 2.495942000 | 15.373596000 | 1.001335000  |
| C | 3.742886000 | 14.599665000 | 5.045410000  |
| C | 2.411013000 | 6.668689000  | 0.294855000  |
| H | 1.824220000 | 6.051575000  | -0.375974000 |
| C | 2.401840000 | 14.207425000 | 5.200970000  |
| H | 1.726834000 | 14.932525000 | 5.637935000  |
| C | 4.186463000 | 15.968954000 | 5.500203000  |
| H | 4.971499000 | 15.868202000 | 6.256739000  |
| H | 3.365539000 | 16.557123000 | 5.912466000  |
| H | 4.626917000 | 16.506903000 | 4.654476000  |
| C | 4.085956000 | 13.968784000 | 1.279493000  |
| C | 1.886287000 | 12.922635000 | 4.963533000  |

---



*B. Optimized Cartesian coordinates using M06-L density functional for the transition state analysis and free energy calculation.*

---

**L1• (S=1/2)**

---

|                                              |                             |
|----------------------------------------------|-----------------------------|
| Zero-point correction=                       | 0.230748 (Hartree/Particle) |
| Thermal correction to Energy=                | 0.244613                    |
| Thermal correction to Enthalpy=              | 0.245557                    |
| Thermal correction to Gibbs Free Energy=     | 0.187974                    |
| Sum of electronic and zero-point Energies=   | -796.882866                 |
| Sum of electronic and thermal Energies=      | -796.869001                 |
| Sum of electronic and thermal Enthalpies=    | -796.868057                 |
| Sum of electronic and thermal Free Energies= | -796.925640                 |

---

Cartesian Coordinates

---

|   |              |              |              |
|---|--------------|--------------|--------------|
| N | 1.520908000  | -1.821421000 | 0.160784000  |
| N | 2.450321000  | 0.215941000  | -0.003473000 |
| N | -2.450320000 | 0.215939000  | 0.003483000  |
| C | -2.853076000 | -1.952646000 | -0.183573000 |
| H | -3.326821000 | -2.921520000 | -0.274519000 |
| C | -4.822226000 | -0.251242000 | -0.054093000 |
| H | -5.627976000 | -0.974815000 | -0.124999000 |
| C | 2.702345000  | 1.559658000  | -0.132663000 |
| H | 1.840246000  | 2.210336000  | -0.212104000 |
| C | -5.074689000 | 1.093744000  | 0.066261000  |
| H | -6.094221000 | 1.462887000  | 0.091799000  |
| C | 1.252024000  | -0.507032000 | 0.047346000  |
| C | -3.498903000 | -0.717384000 | -0.084975000 |
| C | 4.822225000  | -0.251245000 | 0.054090000  |
| H | 5.627974000  | -0.974820000 | 0.124998000  |
| C | -3.988837000 | 2.007446000  | 0.162598000  |
| H | -4.168186000 | 3.071582000  | 0.265344000  |
| C | 3.988841000  | 2.007444000  | -0.162599000 |
| H | 4.168192000  | 3.071580000  | -0.265340000 |
| C | 0.000000000  | 0.129111000  | -0.000010000 |
| C | 3.498901000  | -0.717383000 | 0.084989000  |
| C | -2.702342000 | 1.559656000  | 0.132676000  |
| H | -1.840242000 | 2.210329000  | 0.212148000  |
| C | 5.074692000  | 1.093739000  | -0.066275000 |
| H | 6.094224000  | 1.462878000  | -0.091831000 |
| C | 2.853072000  | -1.952645000 | 0.183578000  |
| H | 3.326816000  | -2.921519000 | 0.274528000  |
| N | -1.520911000 | -1.821423000 | -0.160789000 |
| C | -1.252025000 | -0.507036000 | -0.047353000 |
| H | -0.000002000 | 1.214721000  | -0.000042000 |

---

[L1\*...L1\*]<sup>#</sup> (S=1)

---

|                                              |                             |
|----------------------------------------------|-----------------------------|
| Zero-point correction=                       | 0.462788 (Hartree/Particle) |
| Thermal correction to Energy=                | 0.490921                    |
| Thermal correction to Enthalpy=              | 0.491865                    |
| Thermal correction to Gibbs Free Energy=     | 0.403431                    |
| Sum of electronic and zero-point Energies=   | -1593.735621                |
| Sum of electronic and thermal Energies=      | -1593.707488                |
| Sum of electronic and thermal Enthalpies=    | -1593.706544                |
| Sum of electronic and thermal Free Energies= | -1593.794978                |

---

Cartesian Coordinates

---

|   |              |              |              |
|---|--------------|--------------|--------------|
| N | 2.377617000  | 9.101924000  | 4.570909000  |
| N | -0.446067000 | 7.245667000  | 8.084274000  |
| N | -0.691327000 | 9.435499000  | 7.697995000  |
| N | 1.712683000  | 10.616145000 | 6.097804000  |
| C | -0.025776000 | 5.934235000  | 8.089213000  |
| H | 0.870540000  | 5.696290000  | 7.520832000  |
| C | 1.642948000  | 9.328618000  | 5.734544000  |
| C | 2.902161000  | 10.319236000 | 4.154373000  |
| C | 3.666004000  | 10.401445000 | 3.001354000  |
| H | 4.054678000  | 11.358513000 | 2.676148000  |
| C | -1.542353000 | 7.680431000  | 8.848425000  |
| C | 1.197038000  | 8.238751000  | 6.551906000  |
| H | 1.237255000  | 7.272603000  | 6.047786000  |
| C | 0.032276000  | 8.356204000  | 7.403562000  |
| C | -0.702064000 | 5.028898000  | 8.849681000  |
| H | -0.354836000 | 4.002379000  | 8.859038000  |
| C | 2.455878000  | 11.224067000 | 5.153411000  |
| H | 2.662870000  | 12.286470000 | 5.193684000  |
| C | 2.559438000  | 7.918959000  | 3.839350000  |
| H | 2.123522000  | 7.013392000  | 4.237159000  |
| C | -1.644909000 | 9.041375000  | 8.566133000  |
| H | -2.377261000 | 9.733870000  | 8.958543000  |
| C | 3.367520000  | 7.993712000  | 2.694683000  |
| H | 3.548382000  | 7.073427000  | 2.147333000  |
| C | 3.914789000  | 9.181797000  | 2.263053000  |
| H | 4.527862000  | 9.209133000  | 1.368884000  |
| C | -1.814185000 | 5.427079000  | 9.640090000  |
| H | -2.333105000 | 4.691459000  | 10.246196000 |
| C | -2.223862000 | 6.735638000  | 9.639516000  |
| H | -3.068196000 | 7.067469000  | 10.234930000 |
| N | 1.934316000  | 8.654084000  | 9.801608000  |
| N | 4.672179000  | 7.218442000  | 6.095742000  |

|   |             |              |              |
|---|-------------|--------------|--------------|
| N | 3.175846000 | 5.670840000  | 6.680654000  |
| N | 2.532435000 | 6.500511000  | 9.661965000  |
| C | 5.387412000 | 8.381830000  | 5.925520000  |
| H | 5.041162000 | 9.250477000  | 6.472909000  |
| C | 2.473139000 | 7.657487000  | 8.998875000  |
| C | 1.652702000 | 8.065871000  | 11.044112000 |
| C | 1.103839000 | 8.872412000  | 12.057022000 |
| H | 0.879343000 | 8.421716000  | 13.018246000 |
| C | 5.017168000 | 6.034930000  | 5.418554000  |
| C | 2.846919000 | 7.935437000  | 7.631940000  |
| H | 3.260796000 | 8.939388000  | 7.522449000  |
| C | 3.564744000 | 6.932211000  | 6.872850000  |
| C | 6.455043000 | 8.391534000  | 5.080223000  |
| H | 6.997698000 | 9.319477000  | 4.940315000  |
| C | 2.044476000 | 6.733220000  | 10.894392000 |
| H | 1.992449000 | 5.953678000  | 11.642779000 |
| C | 1.679808000 | 9.980807000  | 9.542910000  |
| H | 1.847469000 | 10.330508000 | 8.526644000  |
| C | 4.052236000 | 5.113545000  | 5.817664000  |
| H | 3.967107000 | 4.082053000  | 5.504273000  |
| C | 1.163533000 | 10.756365000 | 10.537825000 |
| H | 0.950182000 | 11.796646000 | 10.322755000 |
| C | 0.868882000 | 10.202450000 | 11.812352000 |
| H | 0.445381000 | 10.834073000 | 12.586464000 |
| C | 6.847200000 | 7.211806000  | 4.392634000  |
| H | 7.705908000 | 7.236342000  | 3.730613000  |
| C | 6.134697000 | 6.051872000  | 4.563524000  |
| H | 6.408952000 | 5.136210000  | 4.049722000  |

-----  
**(L1)<sub>2</sub> (S=0)**  
 -----

|                                              |                             |
|----------------------------------------------|-----------------------------|
| Zero-point correction=                       | 0.470093 (Hartree/Particle) |
| Thermal correction to Energy=                | 0.496396                    |
| Thermal correction to Enthalpy=              | 0.497340                    |
| Thermal correction to Gibbs Free Energy=     | 0.414554                    |
| Sum of electronic and zero-point Energies=   | -1593.819259                |
| Sum of electronic and thermal Energies=      | -1593.792957                |
| Sum of electronic and thermal Enthalpies=    | -1593.792012                |
| Sum of electronic and thermal Free Energies= | -1593.874798                |

-----  
 Cartesian Coordinates  
 -----

|   |              |             |              |
|---|--------------|-------------|--------------|
| N | -2.390345000 | 1.562911000 | 0.258194000  |
| N | 2.390524000  | 1.562850000 | 0.256023000  |
| N | 1.498703000  | 1.590344000 | -1.785118000 |
| N | -1.500652000 | 1.589990000 | -1.783878000 |
| C | 2.639667000  | 1.407047000 | 1.602857000  |

|   |              |              |              |
|---|--------------|--------------|--------------|
| H | 1.819767000  | 1.041277000  | 2.209175000  |
| C | -1.253685000 | 1.366163000  | -0.500998000 |
| C | -3.409652000 | 1.959931000  | -0.633655000 |
| C | -4.698327000 | 2.205777000  | -0.116342000 |
| H | -5.481816000 | 2.506124000  | -0.804766000 |
| C | 3.408857000  | 1.960155000  | -0.636812000 |
| C | -0.000049000 | 0.794379000  | 0.075480000  |
| H | 0.000366000  | 0.971321000  | 1.158931000  |
| C | 1.253078000  | 1.366198000  | -0.502033000 |
| C | 3.888060000  | 1.649730000  | 2.085560000  |
| H | 4.068332000  | 1.508103000  | 3.145142000  |
| C | -2.797834000 | 1.966433000  | -1.878397000 |
| H | -3.249505000 | 2.217901000  | -2.828526000 |
| C | -2.637969000 | 1.407623000  | 1.605355000  |
| H | -1.817379000 | 1.042119000  | 2.210883000  |
| C | 2.795765000  | 1.966821000  | -1.880930000 |
| H | 3.246419000  | 2.218530000  | -2.831477000 |
| C | -3.885812000 | 1.650486000  | 2.089375000  |
| H | -4.064889000 | 1.509299000  | 3.149217000  |
| C | -4.938966000 | 2.055411000  | 1.222523000  |
| H | -5.929091000 | 2.235470000  | 1.627706000  |
| C | 4.940211000  | 2.055123000  | 1.217704000  |
| H | 5.930777000  | 2.235082000  | 1.621854000  |
| C | 4.698058000  | 2.205981000  | -0.120833000 |
| H | 5.480741000  | 2.506670000  | -0.810025000 |
| N | 2.390527000  | -1.562880000 | -0.256031000 |
| N | -2.390358000 | -1.562922000 | -0.258193000 |
| N | -1.500607000 | -1.590140000 | 1.783846000  |
| N | 1.498752000  | -1.590236000 | 1.785135000  |
| C | -2.638011000 | -1.407564000 | -1.605346000 |
| H | -1.817441000 | -1.041997000 | -2.210873000 |
| C | 1.253092000  | -1.366220000 | 0.502030000  |
| C | 3.408892000  | -1.960101000 | 0.636811000  |
| C | 4.698094000  | -2.205913000 | 0.120824000  |
| H | 5.480803000  | -2.506525000 | 0.810019000  |
| C | -3.409640000 | -1.959996000 | 0.633659000  |
| C | -0.000046000 | -0.794420000 | -0.075490000 |
| H | 0.000344000  | -0.971360000 | -1.158941000 |
| C | -1.253675000 | -1.366215000 | 0.500979000  |
| C | -3.885876000 | -1.650370000 | -2.089340000 |
| H | -4.064981000 | -1.509116000 | -3.149167000 |
| C | 2.795804000  | -1.966759000 | 1.880931000  |
| H | 3.246493000  | -2.218389000 | 2.831483000  |
| C | 2.639655000  | -1.407117000 | -1.602868000 |
| H | 1.819726000  | -1.041452000 | -2.209199000 |
| C | -2.797809000 | -1.966506000 | 1.878394000  |
| H | -3.249448000 | -2.218023000 | 2.828525000  |
| C | 3.888046000  | -1.649784000 | -2.085581000 |
| H | 4.068301000  | -1.508191000 | -3.145172000 |

|   |              |              |              |
|---|--------------|--------------|--------------|
| C | 4.940221000  | -2.055110000 | -1.217725000 |
| H | 5.930778000  | -2.235089000 | -1.621886000 |
| C | -4.939011000 | -2.055327000 | -1.222479000 |
| H | -5.929159000 | -2.235311000 | -1.627640000 |
| C | -4.698329000 | -2.205803000 | 0.116365000  |
| H | -5.481802000 | -2.506185000 | 0.804792000  |

---

[L1...<sup>3</sup>O<sub>2</sub>]<sup>#</sup> (S=1/2)

---

|                                              |                             |
|----------------------------------------------|-----------------------------|
| Zero-point correction=                       | 0.238781 (Hartree/Particle) |
| Thermal correction to Energy=                | 0.254413                    |
| Thermal correction to Enthalpy=              | 0.255357                    |
| Thermal correction to Gibbs Free Energy=     | 0.194074                    |
| Sum of electronic and zero-point Energies=   | -947.191260                 |
| Sum of electronic and thermal Energies=      | -947.175628                 |
| Sum of electronic and thermal Enthalpies=    | -947.174684                 |
| Sum of electronic and thermal Free Energies= | -947.235967                 |

---

Cartesian Coordinates

---

|   |              |              |              |
|---|--------------|--------------|--------------|
| N | 2.240654000  | 21.701507000 | 5.326315000  |
| N | 1.289960000  | 19.676094000 | 5.367873000  |
| N | -1.218959000 | 19.512835000 | 7.067690000  |
| N | -1.741276000 | 21.411793000 | 8.131136000  |
| C | 2.606851000  | 23.000878000 | 5.578465000  |
| H | 2.055831000  | 23.517034000 | 6.356648000  |
| C | -2.387373000 | 19.339858000 | 7.705427000  |
| H | -2.928605000 | 18.404552000 | 7.659229000  |
| C | 2.935127000  | 20.900586000 | 4.410724000  |
| C | 4.009735000  | 21.467540000 | 3.701806000  |
| H | 4.547433000  | 20.849495000 | 2.990335000  |
| C | 4.358618000  | 22.775299000 | 3.926159000  |
| H | 5.188083000  | 23.221756000 | 3.388133000  |
| C | 2.299267000  | 19.658378000 | 4.482854000  |
| H | 2.545841000  | 18.769521000 | 3.918308000  |
| C | 3.645021000  | 23.545026000 | 4.882172000  |
| H | 3.927295000  | 24.570969000 | 5.087761000  |
| C | -3.857130000 | 22.170657000 | 9.726881000  |
| H | -4.678651000 | 22.494064000 | 10.357224000 |
| C | -1.734518000 | 22.671090000 | 8.679993000  |
| H | -0.861567000 | 23.281623000 | 8.476772000  |
| C | 0.344035000  | 21.465278000 | 6.853311000  |
| C | 1.237498000  | 20.909508000 | 5.872179000  |
| C | -2.769028000 | 20.496060000 | 8.390714000  |
| C | -0.827052000 | 20.764562000 | 7.308197000  |
| C | -2.782727000 | 23.059611000 | 9.461238000  |

|   |              |              |             |
|---|--------------|--------------|-------------|
| H | -2.769643000 | 24.054978000 | 9.890120000 |
| C | -3.843527000 | 20.903206000 | 9.201918000 |
| H | -4.642714000 | 20.196797000 | 9.399876000 |
| H | 0.194030000  | 22.544190000 | 6.748151000 |
| O | 1.355469000  | 21.734596000 | 8.327037000 |
| O | 1.449019000  | 22.994054000 | 8.577429000 |

---

**L1-O<sub>2</sub> (S=1/2)**

---

|                                              |                             |
|----------------------------------------------|-----------------------------|
| Zero-point correction=                       | 0.239436 (Hartree/Particle) |
| Thermal correction to Energy=                | 0.255390                    |
| Thermal correction to Enthalpy=              | 0.256335                    |
| Thermal correction to Gibbs Free Energy=     | 0.194189                    |
| Sum of electronic and zero-point Energies=   | -947.191741                 |
| Sum of electronic and thermal Energies=      | -947.175786                 |
| Sum of electronic and thermal Enthalpies=    | -947.174842                 |
| Sum of electronic and thermal Free Energies= | -947.236988                 |

---

Cartesian Coordinates

---

|   |              |              |              |
|---|--------------|--------------|--------------|
| N | -2.447291000 | -0.028100000 | -0.138120000 |
| N | -1.494766000 | 1.965223000  | 0.195799000  |
| N | 1.495340000  | 1.963921000  | 0.204078000  |
| N | 2.447090000  | -0.028267000 | -0.138962000 |
| C | -2.698257000 | -1.371808000 | -0.291369000 |
| H | -1.841315000 | -2.033161000 | -0.224519000 |
| C | 2.825772000  | 2.138217000  | 0.089075000  |
| H | 3.278219000  | 3.117762000  | 0.159678000  |
| C | -3.477249000 | 0.924793000  | -0.129817000 |
| C | -4.800151000 | 0.481744000  | -0.318880000 |
| H | -5.599262000 | 1.215744000  | -0.317719000 |
| C | -5.052790000 | -0.854379000 | -0.495612000 |
| H | -6.068970000 | -1.205973000 | -0.639403000 |
| C | -2.825168000 | 2.139501000  | 0.080126000  |
| H | -3.277221000 | 3.119563000  | 0.146219000  |
| C | -3.982800000 | -1.788448000 | -0.475968000 |
| H | -4.173142000 | -2.849059000 | -0.593173000 |
| C | 5.052526000  | -0.853940000 | -0.498813000 |
| H | 6.068639000  | -1.205247000 | -0.643772000 |
| C | 2.697754000  | -1.371383000 | -0.297505000 |
| H | 1.840682000  | -2.032774000 | -0.233457000 |
| C | -0.000141000 | -0.070931000 | 0.099114000  |
| C | -1.264061000 | 0.665797000  | 0.052552000  |
| C | 3.477420000  | 0.924177000  | -0.126043000 |
| C | 1.264057000  | 0.665311000  | 0.054342000  |
| C | 3.982230000  | -1.787713000 | -0.483325000 |
| H | 4.172243000  | -2.847903000 | -0.604761000 |

|   |              |              |              |
|---|--------------|--------------|--------------|
| C | 4.800239000  | 0.481519000  | -0.316585000 |
| H | 5.599567000  | 1.215268000  | -0.312028000 |
| H | 0.000117000  | -0.909478000 | -0.611689000 |
| O | -0.001024000 | -0.892462000 | 1.448237000  |
| O | 0.001218000  | -2.186154000 | 1.222676000  |

---

**L1' (S=0)**

---

|                                              |                             |
|----------------------------------------------|-----------------------------|
| Zero-point correction=                       | 0.226640 (Hartree/Particle) |
| Thermal correction to Energy=                | 0.240741                    |
| Thermal correction to Enthalpy=              | 0.241686                    |
| Thermal correction to Gibbs Free Energy=     | 0.183857                    |
| Sum of electronic and zero-point Energies=   | -871.540930                 |
| Sum of electronic and thermal Energies=      | -871.526828                 |
| Sum of electronic and thermal Enthalpies=    | -871.525884                 |
| Sum of electronic and thermal Free Energies= | -871.583713                 |

---

Cartesian Coordinates

---

|   |              |              |              |
|---|--------------|--------------|--------------|
| N | 1.442213000  | 1.809591000  | -0.000568000 |
| N | 2.489070000  | -0.174120000 | 0.000009000  |
| N | -2.489070000 | -0.174119000 | -0.000013000 |
| C | -2.760575000 | 2.027461000  | 0.000617000  |
| H | -3.176719000 | 3.026453000  | 0.000905000  |
| C | -4.827160000 | 0.454163000  | 0.000157000  |
| H | -5.578167000 | 1.237386000  | 0.000364000  |
| C | 2.829431000  | -1.507645000 | 0.000372000  |
| H | 1.996492000  | -2.194392000 | 0.000544000  |
| C | -5.168679000 | -0.874994000 | -0.000204000 |
| H | -6.211166000 | -1.175269000 | -0.000272000 |
| C | 1.257053000  | 0.486277000  | -0.000190000 |
| C | -3.472149000 | 0.823519000  | 0.000258000  |
| C | 4.827160000  | 0.454164000  | -0.000135000 |
| H | 5.578166000  | 1.237388000  | -0.000332000 |
| C | -4.149272000 | -1.858688000 | -0.000474000 |
| H | -4.400623000 | -2.913143000 | -0.000754000 |
| C | 4.149273000  | -1.858688000 | 0.000488000  |
| H | 4.400625000  | -2.913142000 | 0.000767000  |
| C | 0.000000000  | -0.248168000 | -0.000031000 |
| C | 3.472149000  | 0.823519000  | -0.000250000 |
| C | -2.829429000 | -1.507644000 | -0.000373000 |
| H | -1.996488000 | -2.194389000 | -0.000557000 |
| C | 5.168680000  | -0.874992000 | 0.000229000  |
| H | 6.211167000  | -1.175267000 | 0.000309000  |
| C | 2.760574000  | 2.027460000  | -0.000608000 |
| H | 3.176717000  | 3.026453000  | -0.000885000 |
| N | -1.442214000 | 1.809592000  | 0.000561000  |

|   |              |              |              |
|---|--------------|--------------|--------------|
| C | -1.257053000 | 0.486278000  | 0.000159000  |
| O | -0.000001000 | -1.496354000 | -0.000013000 |

---

**$^3\text{O}_2$  ( $S=1$ )**

---

|                                              |                             |
|----------------------------------------------|-----------------------------|
| Zero-point correction=                       | 0.003770 (Hartree/Particle) |
| Thermal correction to Energy=                | 0.006133                    |
| Thermal correction to Enthalpy=              | 0.007078                    |
| Thermal correction to Gibbs Free Energy=     | -0.016213                   |
| Sum of electronic and zero-point Energies=   | -150.303834                 |
| Sum of electronic and thermal Energies=      | -150.301471                 |
| Sum of electronic and thermal Enthalpies=    | -150.300527                 |
| Sum of electronic and thermal Free Energies= | -150.323818                 |

---

Cartesian Coordinates

---

|   |             |             |              |
|---|-------------|-------------|--------------|
| O | 0.000000000 | 0.000000000 | 0.608736000  |
| O | 0.000000000 | 0.000000000 | -0.608736000 |

---

**$\text{OH}^\bullet$  ( $S=1/2$ )**

---

|                                              |                             |
|----------------------------------------------|-----------------------------|
| Zero-point correction=                       | 0.008603 (Hartree/Particle) |
| Thermal correction to Energy=                | 0.010964                    |
| Thermal correction to Enthalpy=              | 0.011908                    |
| Thermal correction to Gibbs Free Energy=     | -0.008320                   |
| Sum of electronic and zero-point Energies=   | -75.711202                  |
| Sum of electronic and thermal Energies=      | -75.708842                  |
| Sum of electronic and thermal Enthalpies=    | -75.707897                  |
| Sum of electronic and thermal Free Energies= | -75.728125                  |

---

Cartesian Coordinates

---

|   |             |             |              |
|---|-------------|-------------|--------------|
| O | 0.000000000 | 0.000000000 | 0.108133000  |
| H | 0.000000000 | 0.000000000 | -0.865061000 |

---

**{Cu<sup>II</sup>-L1<sup>•</sup>} for **1a** ( $S=1$ )**

---

|                                              |                             |
|----------------------------------------------|-----------------------------|
| Zero-point correction=                       | 0.337264 (Hartree/Particle) |
| Thermal correction to Energy=                | 0.363813                    |
| Thermal correction to Enthalpy=              | 0.364757                    |
| Thermal correction to Gibbs Free Energy=     | 0.275634                    |
| Sum of electronic and zero-point Energies=   | -1449.946287                |
| Sum of electronic and thermal Energies=      | -1449.919739                |
| Sum of electronic and thermal Enthalpies=    | -1449.918794                |
| Sum of electronic and thermal Free Energies= | -1450.007918                |



---

Cartesian Coordinates

---

|    |              |              |              |
|----|--------------|--------------|--------------|
| O  | 3.388453000  | 11.551618000 | 8.024152000  |
| O  | 2.764517000  | 12.630332000 | 6.177532000  |
| N  | 2.451918000  | 8.061795000  | 4.286445000  |
| N  | -0.839377000 | 7.927878000  | 7.959013000  |
| O  | -0.505424000 | 12.491582000 | 5.647898000  |
| N  | 0.151584000  | 9.868748000  | 7.531909000  |
| N  | 2.101120000  | 9.935531000  | 5.425667000  |
| C  | -1.261787000 | 6.621813000  | 7.968116000  |
| H  | -0.815276000 | 5.961900000  | 7.231899000  |
| C  | 1.737097000  | 8.637318000  | 5.326854000  |
| O  | 0.293828000  | 12.730225000 | 7.713788000  |
| C  | 3.281746000  | 9.056802000  | 3.735486000  |
| C  | 3.585835000  | 12.417199000 | 7.153115000  |
| C  | 4.111102000  | 8.715555000  | 2.653608000  |
| H  | 4.752870000  | 9.483138000  | 2.229371000  |
| C  | -1.347594000 | 8.874828000  | 8.868677000  |
| C  | 0.803196000  | 7.957858000  | 6.118605000  |
| H  | 0.627979000  | 6.904266000  | 5.922887000  |
| C  | 0.083692000  | 8.574116000  | 7.149570000  |
| C  | -2.196069000 | 6.225465000  | 8.875841000  |
| H  | -2.521097000 | 5.189638000  | 8.872981000  |
| C  | 3.021106000  | 10.201906000 | 4.483541000  |
| H  | 3.437577000  | 11.197602000 | 4.395813000  |
| C  | 2.432782000  | 6.783098000  | 3.787402000  |
| H  | 1.757478000  | 6.083982000  | 4.269159000  |
| C  | -0.695539000 | 10.064669000 | 8.556067000  |
| H  | -0.791107000 | 11.046540000 | 9.002307000  |
| C  | 3.238245000  | 6.460461000  | 2.737962000  |
| H  | 3.213205000  | 5.445728000  | 2.352438000  |
| C  | 4.094684000  | 7.436574000  | 2.157132000  |
| H  | 4.730432000  | 7.164318000  | 1.319274000  |
| C  | -2.733941000 | 7.152176000  | 9.811238000  |
| H  | -3.477788000 | 6.820021000  | 10.530098000 |
| C  | -2.310874000 | 8.457508000  | 9.802935000  |
| H  | -2.702833000 | 9.187768000  | 10.505662000 |
| C  | 4.808882000  | 13.302331000 | 7.182456000  |
| H  | 4.514748000  | 14.320065000 | 7.463145000  |
| H  | 5.267761000  | 13.369569000 | 6.190110000  |
| H  | 5.538534000  | 12.933534000 | 7.907374000  |
| C  | -0.506037000 | 13.061079000 | 6.753924000  |
| C  | -1.445152000 | 14.206273000 | 7.048991000  |
| H  | -2.215986000 | 14.285463000 | 6.278495000  |
| H  | -0.877118000 | 15.143155000 | 7.077088000  |
| H  | -1.909662000 | 14.089411000 | 8.033917000  |
| Cu | 1.341499000  | 11.342153000 | 6.723064000  |

---

1a (S=1)

---

|                                              |                             |
|----------------------------------------------|-----------------------------|
| Zero-point correction=                       | 0.681328 (Hartree/Particle) |
| Thermal correction to Energy=                | 0.731573                    |
| Thermal correction to Enthalpy=              | 0.732517                    |
| Thermal correction to Gibbs Free Energy=     | 0.595045                    |
| Sum of electronic and zero-point Energies=   | -2899.980869                |
| Sum of electronic and thermal Energies=      | -2899.930624                |
| Sum of electronic and thermal Enthalpies=    | -2899.929680                |
| Sum of electronic and thermal Free Energies= | -2900.067152                |

---

Cartesian Coordinates

---

|   |              |              |              |
|---|--------------|--------------|--------------|
| O | 3.180389000  | 11.248547000 | 8.096785000  |
| O | 2.764417000  | 12.651260000 | 6.408830000  |
| N | 2.437937000  | 8.160612000  | 4.301111000  |
| N | -0.458492000 | 7.838929000  | 8.133596000  |
| O | -0.299854000 | 12.793502000 | 5.418880000  |
| N | 0.085035000  | 9.863760000  | 7.463679000  |
| N | 1.887521000  | 10.063420000 | 5.264252000  |
| C | -0.523251000 | 6.479441000  | 8.356150000  |
| H | 0.237524000  | 5.877245000  | 7.872568000  |
| C | 1.905370000  | 8.739689000  | 5.419851000  |
| O | 0.105244000  | 12.766507000 | 7.598637000  |
| C | 2.760558000  | 9.196443000  | 3.399288000  |
| C | 3.471713000  | 12.250850000 | 7.389958000  |
| C | 3.351052000  | 8.848647000  | 2.165374000  |
| H | 3.600778000  | 9.643939000  | 1.467837000  |
| C | -1.370325000 | 8.734094000  | 8.729289000  |
| C | 1.594676000  | 8.005313000  | 6.671905000  |
| H | 1.407453000  | 6.945208000  | 6.441285000  |
| C | 0.408487000  | 8.573858000  | 7.370149000  |
| C | -1.492733000 | 5.985244000  | 9.170753000  |
| H | -1.516887000 | 4.911694000  | 9.338140000  |
| C | 2.391684000  | 10.366924000 | 4.042998000  |
| H | 2.458861000  | 11.393248000 | 3.707554000  |
| C | 2.671967000  | 6.829351000  | 4.009128000  |
| H | 2.366215000  | 6.095004000  | 4.755346000  |
| C | -0.990535000 | 9.987905000  | 8.278273000  |
| H | -1.407727000 | 10.961522000 | 8.496157000  |
| C | 3.249146000  | 6.520009000  | 2.816782000  |
| H | 3.435292000  | 5.473389000  | 2.594444000  |
| C | 3.599070000  | 7.533794000  | 1.880332000  |
| H | 4.059356000  | 7.256225000  | 0.935434000  |
| C | -2.432763000 | 6.854489000  | 9.792443000  |
| H | -3.198374000 | 6.440843000  | 10.443784000 |
| C | -2.370375000 | 8.204135000  | 9.573372000  |

|   |              |              |              |
|---|--------------|--------------|--------------|
| H | -3.075010000 | 8.891146000  | 10.034578000 |
| C | 4.735165000  | 13.019619000 | 7.697729000  |
| H | 4.628197000  | 13.516323000 | 8.668517000  |
| H | 4.949551000  | 13.774790000 | 6.937687000  |
| H | 5.582016000  | 12.329789000 | 7.790380000  |
| C | -0.474993000 | 13.270278000 | 6.558501000  |
| C | -1.348659000 | 14.473198000 | 6.787731000  |
| H | -2.070009000 | 14.586257000 | 5.974569000  |
| H | -0.721757000 | 15.371902000 | 6.815902000  |
| H | -1.867823000 | 14.409652000 | 7.748873000  |
| N | 2.050887000  | 7.918618000  | 10.005648000 |
| N | 4.943381000  | 8.176087000  | 6.177225000  |
| N | 4.378849000  | 6.145500000  | 6.837041000  |
| N | 2.555122000  | 5.982035000  | 9.087658000  |
| C | 5.026857000  | 9.537570000  | 5.976921000  |
| H | 4.299056000  | 10.142744000 | 6.509802000  |
| C | 2.569803000  | 7.302809000  | 8.899329000  |
| C | 1.704411000  | 6.912484000  | 10.931209000 |
| C | 1.113566000  | 7.300268000  | 12.153098000 |
| H | 0.844897000  | 6.526365000  | 12.867439000 |
| C | 5.841109000  | 7.276732000  | 5.567804000  |
| C | 2.888801000  | 8.013955000  | 7.634885000  |
| H | 3.081501000  | 9.074614000  | 7.856035000  |
| C | 4.072700000  | 7.436286000  | 6.937129000  |
| C | 5.992675000  | 10.026936000 | 5.153713000  |
| H | 6.039907000  | 11.102020000 | 5.000371000  |
| C | 2.047497000  | 5.719204000  | 10.317180000 |
| H | 1.949309000  | 4.702865000  | 10.674603000 |
| C | 1.840704000  | 9.260707000  | 10.265781000 |
| H | 2.162503000  | 9.972348000  | 9.506592000  |
| C | 5.448912000  | 6.024297000  | 6.016202000  |
| H | 5.871719000  | 5.054853000  | 5.786374000  |
| C | 1.261506000  | 9.609598000  | 11.445990000 |
| H | 1.093615000  | 10.664812000 | 11.640202000 |
| C | 0.887459000  | 8.625664000  | 12.404598000 |
| H | 0.426546000  | 8.935002000  | 13.339186000 |
| C | 6.911593000  | 9.153082000  | 4.507364000  |
| H | 7.673200000  | 9.564318000  | 3.849788000  |
| C | 6.837747000  | 7.802554000  | 4.717671000  |
| H | 7.530665000  | 7.112532000  | 4.243062000  |
| O | 1.652422000  | 4.811474000  | 6.321279000  |
| O | 0.960671000  | 3.382351000  | 7.886732000  |
| O | 4.147031000  | 3.265913000  | 9.095969000  |
| O | 4.050097000  | 3.001902000  | 6.923540000  |
| C | 0.828183000  | 3.923871000  | 6.775293000  |
| C | -0.351724000 | 3.603001000  | 5.886235000  |
| H | -0.002476000 | 3.226282000  | 4.918688000  |
| H | -1.005270000 | 2.860464000  | 6.349922000  |
| H | -0.926613000 | 4.514036000  | 5.678592000  |

|    |             |              |             |
|----|-------------|--------------|-------------|
| C  | 4.411361000 | 2.570280000  | 8.072510000 |
| C  | 5.101335000 | 1.249504000  | 8.189252000 |
| H  | 5.766798000 | 1.235694000  | 9.056350000 |
| H  | 4.348150000 | 0.466167000  | 8.332503000 |
| H  | 5.657476000 | 1.014433000  | 7.277803000 |
| Cu | 1.151748000 | 11.406422000 | 6.604392000 |
| Cu | 3.164485000 | 4.578773000  | 7.772977000 |

---
